# Supplementary material for: Trait‐specific sensitive developmental windows: Wing growth best integrates weather conditions encountered throughout the development of nestling Alpine swifts
Source: PubMed Central journal article supplement (PMC11156578; doi:10.1002/ece3.11491), 2024-06-06
Supplement: ECE3-14-e11491-s001.pdf [file ECE3-14-e11491-s001.pdf]

# Trait-specific sensitive developmental windows: wing growth best integrates weather conditions encountered throughout the development of nestling Alpine swifts

Supporting Information and codes for the manuscript

Last compiled on 20 May 2024

## Contents

|                                                     |           |
|-----------------------------------------------------|-----------|
| <b>Authors' list and affiliations</b>               | <b>2</b>  |
| ORCIDs . . . . .                                    | 2         |
| <b>Abstract and keywords</b>                        | <b>2</b>  |
| <b>Libraries and datasets</b>                       | <b>3</b>  |
| Libraries . . . . .                                 | 3         |
| Reproducible environment . . . . .                  | 3         |
| The datasets . . . . .                              | 4         |
| <b>Growth curves</b>                                | <b>7</b>  |
| <b>Supporting Information 01 - Climwin analyses</b> | <b>11</b> |
| Weather data . . . . .                              | 11        |
| PCA results . . . . .                               | 12        |
| The climwin approach . . . . .                      | 13        |
| Base model . . . . .                                | 13        |
| Finding the best window . . . . .                   | 14        |
| Investigating the models . . . . .                  | 15        |
| Wing length at 50 days . . . . .                    | 15        |
| Sternum length at 50 days . . . . .                 | 23        |
| Body mass at 50 days . . . . .                      | 31        |
| Adding the variables to the dataset . . . . .       | 41        |
| Figure . . . . .                                    | 42        |
| Testing for segments . . . . .                      | 43        |
| Sternum length . . . . .                            | 45        |
| Body mass . . . . .                                 | 49        |

|                                                                           |           |
|---------------------------------------------------------------------------|-----------|
| <b>Supporting Information 02: Growth rates</b>                            | <b>59</b> |
| Checking the resulting growth rates . . . . .                             | 61        |
| Growth rate models . . . . .                                              | 62        |
| Wing length . . . . .                                                     | 62        |
| Sternum length . . . . .                                                  | 63        |
| Figure . . . . .                                                          | 66        |
| <b>Supporting Information 03: Correlation between the size and growth</b> | <b>66</b> |
| Figure . . . . .                                                          | 66        |
| Pearson’s correlation tests . . . . .                                     | 68        |
| <b>Supporting Information 04: Short-term consequences</b>                 | <b>69</b> |
| Probability of fledging . . . . .                                         | 69        |
| Age at fledging . . . . .                                                 | 72        |
| Figure . . . . .                                                          | 75        |
| Session information . . . . .                                             | 76        |

## Authors’ list and affiliations

Giulia Masoero<sup>1,2</sup> \*, Michela Natalina Dumas<sup>2</sup>, Julien G.A. Martin<sup>2</sup>, Pierre Bize<sup>1</sup> \*

<sup>1</sup> Swiss Ornithological Institute, Seerose 1, 6204 Sempach, Switzerland

<sup>2</sup> Department of Biology, University of Ottawa, Canada

\* **Corresponding authors:** [giulia.masoero@gmail.com](mailto:giulia.masoero@gmail.com), [pierre.bize@vogelwarte.ch](mailto:pierre.bize@vogelwarte.ch)

## ORCIDs

**GM:** 0000-0003-4429-7726

**MND:** 0000-0003-2948-8751

**JGAM:** 0000-0001-7726-6809

**PB:** 0000-0002-6759-4371

## Abstract and keywords

**Abstract:** The size and growth patterns of nestling birds are key determinants of their survival up to fledging and long-term fitness. However, because traits such as feathers, skeleton and body mass can follow different developmental trajectories, our understanding of the impact of adverse weather on development requires insights on trait-specific sensitive developmental windows. We analysed data from nestling Alpine swifts in Switzerland measured throughout growth up to the age of 50 days (i.e. fledging between 50 and 70 days), for wing length and body mass (2693 nestlings in 25 years) and sternum length (2447 nestlings in 22 years). We show that the sensitive developmental windows for wing and sternum length corresponded to the periods of trait-specific peak growth, which span almost the whole developmental period for wings and

the first half for the sternum. Adverse weather conditions during these periods slowed down growth and reduced size. Although nestling body mass at 50 days showed the greatest inter-individual variation, this was explained by weather in the two days before measurement rather than during peak growth. Interestingly, the relationship between temperature and body mass was not linear, and the initial sharp increase in body mass associated with the increase in temperature was followed by a moderate drop on hot days, likely linked to heat stress. Nestlings experiencing adverse weather conditions during wing growth had lower survival rates up to fledging and fledged at later ages, presumably to compensate for slower wing growth. Overall, our results suggest that measures of feather growth and, to some extent, skeletal growth best capture the consequences of adverse weather conditions throughout the whole development of offspring, while body mass better reflects the short, instantaneous effects of weather conditions on their body reserves (i.e. energy depletion vs storage in unfavourable vs favourable conditions).

**Keywords:** Apodiformes, feathers, meteorological conditions, climate change, multi-trait, heat stress, offspring development, early-life conditions, *Tachymarptis (Apus) melba*

**Journal:** Ecology and Evolution

Full script, data and Supporting Information can also be found on the OSF page of the project: <https://osf.io/2ndmk/>

## Libraries and datasets

### Libraries

```
# data manipulation
library(dplyr)
library(lubridate)
# models
library(lme4)
library(lmerTest)
library(climwin)
library(segmented)
library(MuMIn)
# graphics
library(ggplot2)
library(ggtext)
library(scales)
# tables
library(sjPlot)
# others
library(performance)
# renv::update(prompt = FALSE) # use to update the packages within the project
# renv::snapshot(prompt = FALSE) # to update the metadata in the renv.lock about the used packages

knitr::opts_chunk$set(
  fig.path = "cache/",
  cache.path = "cache/",
  cache.extra = getRversion()
)
```

### Reproducible environment

This project has been initialised using the package *renv*.

```
citation("renv")
```

```
## To cite package 'renv' in publications use:
##
##   Ushey K, Wickham H (2024). _renv: Project Environments_. R package version 1.0.7,
##   <https://CRAN.R-project.org/package=renv>.
##
## A BibTeX entry for LaTeX users is
##
##   @Manual{,
##     title = {renv: Project Environments},
##     author = {Kevin Ushey and Hadley Wickham},
##     year = {2024},
##     note = {R package version 1.0.7},
##     url = {https://CRAN.R-project.org/package=renv},
##   }
```

This package allows to upload the exact same version of each of the packages used in this project. This is done using the files in the compressed folder “renv.zip”. The file has to be decompressed to obtain “renv.lock” file, the “.Rprofile” file and the folder “renv”. The packages should then be obtained by running the function `renv::restore()` in the R console.

For more information <https://rstudio.github.io/renv/articles/renv.html>

## The datasets

### *Study system*

Data were collected between 1999 and 2023 in a Swiss population of Alpine swift. It is a long-distance migratory bird that breeds in colonies of a few to several hundred pairs in holes within cliffs or under the roofs of tall buildings. In Switzerland, Alpine swifts return to their breeding grounds from sub-Saharan Africa at the beginning of April (Meier et al. 2020) and start laying eggs between early May and June, with significant adaptive variations in laying dates depending on weather conditions (de Villemereuil et al. 2020). Females lay one clutch a year, with one to four eggs per clutch (modal clutch size is three). Both parents incubate the eggs for about 18 days and then feed their nestlings until fledging, which occurs around 55 days after hatching (range 50-76 days; (Bize et al. 2004) and this manuscript). After breeding, Alpine swifts migrate back to Africa in September (Meier et al. 2020).

Fieldwork was carried out in two Alpine swift colonies located in clock towers in the Swiss cities of Biel (60-100 breeding pairs) and Solothurn (40-55 breeding pairs), ca. 20km apart. Each year, both colonies were regularly visited to monitor egg laying and clutch size, to capture and measure adults, and to ring and measure nestlings. Nestlings were individually recognised by ringing them with numbered metal rings 10 to 15 days after hatching. Nestlings were measured regularly (usually every 5 to 10 days, on average five times in total) until fledging. At each measurement, we measured wing length with a ruler to the nearest 1 mm, sternum size with a calliper to the nearest 0.1 mm, and body mass with a digital scale to the nearest 0.1 g. The measure of sternum length provides an estimate of skeletal growth and size. Tarsus length has been commonly used in passerines, but it is difficult to measure in a repeatable way in a species with short and bulky tarsi, such as swifts. As nestlings are not ringed at hatching, the age of the nestlings in a brood is based on the hatching date of the first nestling; the last nestling is usually born on the same day or 1 day later. Therefore, measurements for a brood of three nestlings, for example, are taken when the first-hatched nestling reaches 50 days of age, the youngest one might be the same age or 1 day younger. Only nestlings that survived up to fledging were included in the statistical analyses. Sample sizes differ between traits, as wing length and body mass have been measured since 1999, while sternum length has been measured since 2003.

```

# parameters for colors
par_col_wing_50 <- "#2D708EFF"
par_col_wing_growth <- "#2D708EFF"
par_col_sternum_50 <- "#440154FF"
par_col_sternum_growth <- "#440154FF"
par_col_mass_50 <- "#56C667FF"

# functions from another script
source("script_functions.R")

# loading the datasets
data_clim <- read.csv("data/data_clim.csv",
  stringsAsFactors = TRUE, na = c("", "NA"))
)
data_am_nestlings <- read.csv("data/data_nestlings.csv",
  stringsAsFactors = TRUE, na = c("", "NA"))
)
data_am_nestlings_all <- read.csv("data/data_nestlings-all-meas.csv",
  stringsAsFactors = TRUE, na = c("", "NA"))
)
data_am_nests <- read.csv("data/data_nests.csv",
  stringsAsFactors = TRUE, na = c("", "NA"))
)

```

```

# creating the metadata
data_clim_meta <- data.frame(
  column_name = colnames(data_clim),
  description = c(
    "year of weather recording",
    "date of weather recording",
    "daily mean ambient temperatures (°C) averaged using data from five stations obtained from Swiss meteorological data",
    "daily total rainfall (degrees Celsius) averaged using data from five stations obtained from Swiss meteorological data",
    "daily mean wind (degrees Celsius) averaged using data from five stations obtained from Swiss meteorological data"
  )
)
write.csv(data_clim_meta,
  file = "data/data_clim_metadata.csv",
  row.names = FALSE
)

data_am_nestlings_meta <- data.frame(
  column_name = colnames(data_am_nestlings),
  description = c(
    "year of measurement recording",
    "colony where the nest was located",
    "code of the nest, equivalent to broodID",
    "individual ID of the nestling",
    "date of hatching of the first nestling in the brood",
    "date of measurement of the nestling",
    "age in days of the nestling at the time of measurement",
    "hour of measurement of the nestling",
    "mass at day 50",
    "wing length at day 50",
  )
)

```

```

    "sternum length at day 50",
    "age at fledging in days since hatching",
    "number of days from the 1st of May of hatching of the first nestling in the brood",
    "brood size (number of hatchlings) of the nest of the focal nestling"
  )
)
write.csv(data_am_nestlings_meta,
  file = "data/data_nestlings_metadata.csv",
  row.names = FALSE
)

data_am_nestlings_all_meta <- data.frame(
  column_name = colnames(data_am_nestlings_all),
  description = c(
    "individual ID of the nestling",
    "wing length at the time of measurement",
    "sternum length at the time of measurement",
    "mass at the time of measurement",
    "age in days of the nestling at the time of measurement"
  )
)
write.csv(data_am_nestlings_all_meta,
  file = "data/data_nestlings_all-meas_metadata.csv",
  row.names = FALSE
)

data_am_nests_meta <- data.frame(
  column_name = colnames(data_am_nests),
  description = c(
    "colony where the nest was located",
    "year of measurement recording",
    "date of hatching of the first nestling in the brood",
    "number of nestlings in the brood that did not fledge",
    "number of nestlings in the brood that fledged",
    "brood size of the nest (number of hatchlings)"
  )
)
write.csv(data_am_nests_meta,
  file = "data/data_am_nests_metadata.csv",
  row.names = FALSE
)

```

```
# handling of date variables
```

```

data_am_nestlings$date_meas <- as.Date(data_am_nestlings$date_meas)
data_am_nestlings$date_hatch <- as.Date(data_am_nestlings$date_hatch)
data_am_nestlings$date_50days <- data_am_nestlings$date_hatch + 50
data_am_nestlings$hatch_doy <- yday(data_am_nestlings$date_hatch)
data_clim$date <- as.Date(data_clim$dateYMD, "%d/%m/%y")

```

```
# scaling variables for the analyses
```

```

data_am_nestlings$day_hatch_1may_sc <-
  fun_scale(data_am_nestlings$day_hatch_1may)

```

```

data_am_nestlings$hatch_doy_sc <- fun_scale(data_am_nestlings$hatch_doy)
# age in days scaled with 50
data_am_nestlings$age_days_sc50 <- data_am_nestlings$age_days - 50

# year of measurement as factor
data_am_nestlings$year_f <- as.factor(data_am_nestlings$year)
data_am_nestlings$ring <- as.factor(data_am_nestlings$ring)

```

Creating the subsets needed for the analyses

```

data_am_nestlings_wing_50 <- subset(data_am_nestlings, !is.na(wing_50))
data_am_nestlings_sternum_50 <- subset(data_am_nestlings, !is.na(sternum_50))
data_am_nestlings_mass_50 <- subset(
  data_am_nestlings,
  !is.na(mass_50) & !is.na(day_hatch_1may)
)
# To include only the reproductive season: subset clim to 1st of May -> 10th of September
data_clim_sub <- subset(
  data_clim,
  as.numeric(strftime(data_clim$date, "%m")) %in% 5:8 |
  as.numeric(strftime(data_clim$date, "%m")) == 9 &
  as.numeric(strftime(data_clim$date, "%d")) <= 10
)

nestlings <- subset(data_am_nestlings_all, ring %in% data_am_nestlings$ring)

nestlings_n <- nestlings %>%
  group_by(ring) %>%
  mutate(n_measures = sum(!is.na(unique(mass)))) %>%
  slice(which.max(age_days))

```

## Growth curves

Developmental trajectories, from hatching to fledging, of nestling Alpine swifts. Dots represent individual measurements of wing and sternum length and body mass of nestlings measured between 1999 and 2023, and smooth lines represent the average growth pattern of nestlings. The sensitive developmental windows during which weather conditions most affected the phenotype at 50 days (see results below) are highlighted with a purple background.

```

cowplot::plot_grid(
  fun_plot_growth(data_am_nestlings_all, "wing"),
  fun_plot_growth(data_am_nestlings_all, "sternum"),
  fun_plot_growth(data_am_nestlings_all, "mass") +
  xlab("Age (days)"),
  nrow = 3, align = "hv"
)

```

```

# Save the plot to the figures directory
ggsave("figures/Fig. 1 - Growth curves.png", width = 7, height = 5, dpi = 300)

```

Sample sizes for this figure:

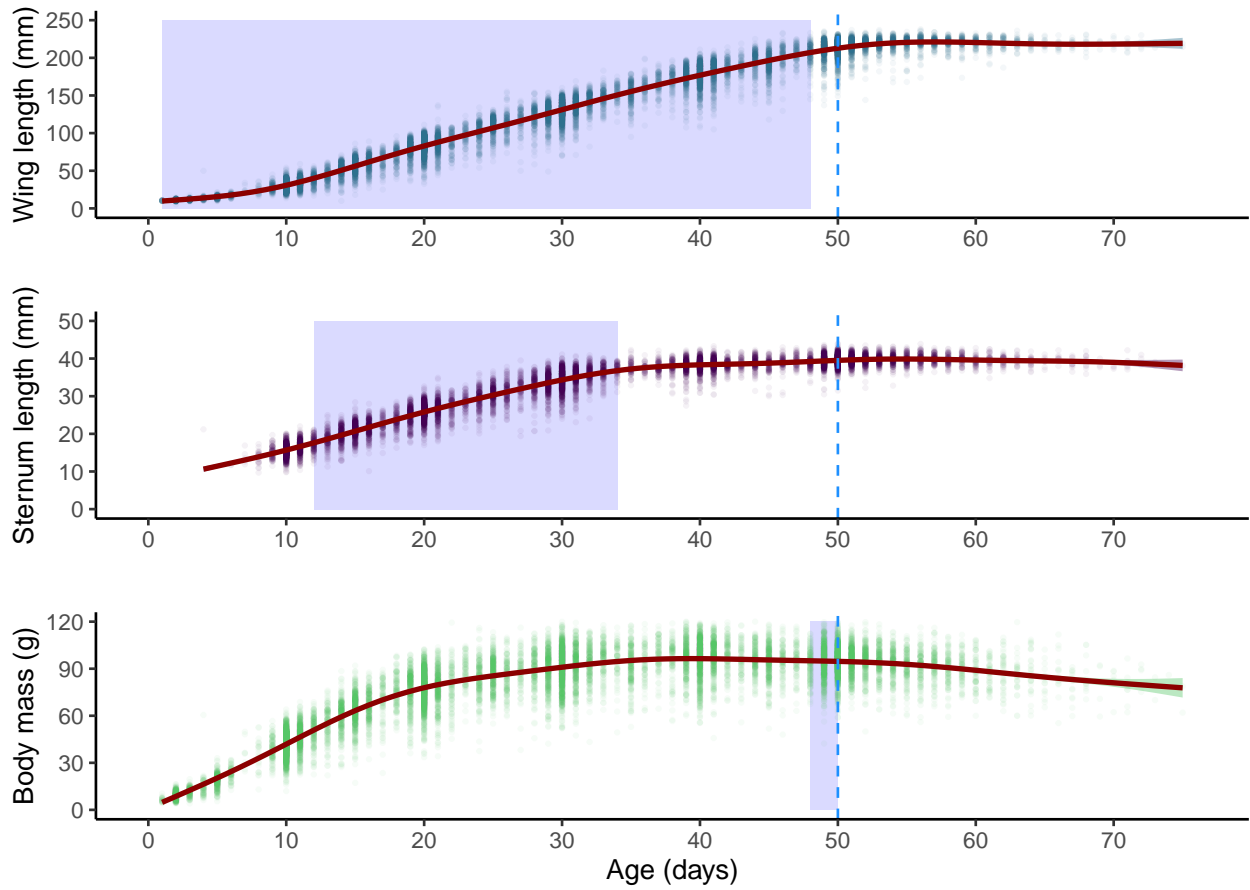

Figure 1: Fig. 1 - Growth curves for the wing, sternum and body mass in Alpine swifts nestlings. The rectangle in blue highlights the time interval used to calculate the growth rates used in the models. The vertical dashed line marks day 50 of chicks growth.



```

table_means <- data.frame(
  Trait = c("Wing", "Sternum", "Body mass"),
  No_measures = c(
    sum(
      !is.na(data_am_nestlings_all$wing)
    ),
    sum(
      !is.na(data_am_nestlings_all$sternum)
    ),
    sum(
      !is.na(data_am_nestlings_all$mass)
    )
  ),
  No_individuals = c(
    sum(
      !is.na(unique(subset(data_am_nestlings_all, !is.na(wing))$wing))
    ),
    sum(
      !is.na(unique(subset(data_am_nestlings_all, !is.na(sternum))$sternum))
    ),
    sum(
      !is.na(unique(subset(data_am_nestlings_all, !is.na(mass))$mass))
    )
  )
)

knitr::kable(table_means,
  caption =
    "Number of measures and of individuals measured for the measures wing length, sternum length and body mass",
  digits = 2
)

```

Table 1: Number of measures and of individuals measured for the measures wing length, sternum length and body mass for nestling Alpine swifts.

| Trait     | No_measures | No_individuals |
|-----------|-------------|----------------|
| Wing      | 15865       | 557            |
| Sternum   | 12662       | 335            |
| Body mass | 15967       | 1153           |

```

table_means <- data.frame(
  Trait = c("Wing", "Sternum", "Body mass"),
  MeanSD = c(
    paste0(
      round(mean(data_am_nestlings_wing_50$wing_50), 2), " + ",
      round(sd(data_am_nestlings_wing_50$wing_50), 2)
    ),
    paste0(
      round(mean(data_am_nestlings_sternum_50$sternum_50), 2), " + ",
      round(sd(data_am_nestlings_sternum_50$sternum_50), 2)
    )
  )
)

```

```

),
paste0(
  round(mean(data_am_nestlings_mass_50$mass_50), 2), " + ",
  round(sd(data_am_nestlings_mass_50$mass_50), 2)
)
),
Range = c(
  paste0(
    min(data_am_nestlings_wing_50$wing_50), " - ",
    max(data_am_nestlings_wing_50$wing_50)
  ),
  paste0(
    min(data_am_nestlings_sternum_50$sternum_50), " - ",
    max(data_am_nestlings_sternum_50$sternum_50)
  ),
  paste0(
    min(data_am_nestlings_mass_50$mass_50), " - ",
    max(data_am_nestlings_mass_50$mass_50)
  )
),
C.V. = c(
  fun_cv(data_am_nestlings_wing_50$wing_50),
  fun_cv(data_am_nestlings_sternum_50$sternum_50),
  fun_cv(data_am_nestlings_mass_50$mass_50)
),
No = c(
  sum(
    !is.na(data_am_nestlings_wing_50$wing_50)
  ),
  sum(
    !is.na(data_am_nestlings_sternum_50$sternum_50)
  ),
  sum(
    !is.na(data_am_nestlings_mass_50$mass_50)
  )
)
)

```

```

knitr::kable(table_means,
caption =
  "Mean and standard deviation (SD), range (min and max), coefficient of variation (C.V.) and sample size",
  digits = 2
)

```

Table 2: Mean and standard deviation (SD), range (min and max), coefficient of variation (C.V.) and sample size in wing length, sternum length and body mass for nestling Alpine swifts.

| Trait   | MeanSD         | Range     | C.V. | No   |
|---------|----------------|-----------|------|------|
| Wing    | 212.46 + 11.85 | 151 – 237 | 5.58 | 2693 |
| Sternum | 39.48 + 1.42   | 30.5 – 44 | 3.60 | 2447 |

| Trait     | MeanSD       | Range        | C.V.  | No   |
|-----------|--------------|--------------|-------|------|
| Body mass | 94.81 + 9.51 | 56.3 – 127.3 | 10.03 | 2693 |

## Supporting Information 01 - Climwin analyses

### Weather data

To estimate the weather conditions during nestling development, we used meteorological data collected from five Swiss meteorological stations surrounding Biel and Solothurn (Bern-Zollikofen, Cressier, Grenchen, Koppigen, Wynau). Doing so allowed us to cover the whole foraging area of the swifts (up to 30 km in a single foraging trip) (Arn-Willi 1960) and to account for microenvironmental variations (i.e., strong weather events captured by one station only). Daily weather data were averaged across the five stations to obtain two variables: mean daily temperature (average air temperature at 2 m above ground for the whole day), daily precipitation (total rainfall for that day) and wind speed (daily mean of the wind speed scalar in m/s.). We also used a principal component analysis to calculate a daily first component (PC1) between temperature and precipitation for the meteorological data collected during the whole breeding season (May-August). PC1 explained 60% of the total variance in weather data, with factor loadings of 0.71 for the mean temperature and -0.71 for the mean precipitation. A high PC1 value, therefore, indicates warm and dry weather, whereas low values indicate cold and rainy weather.

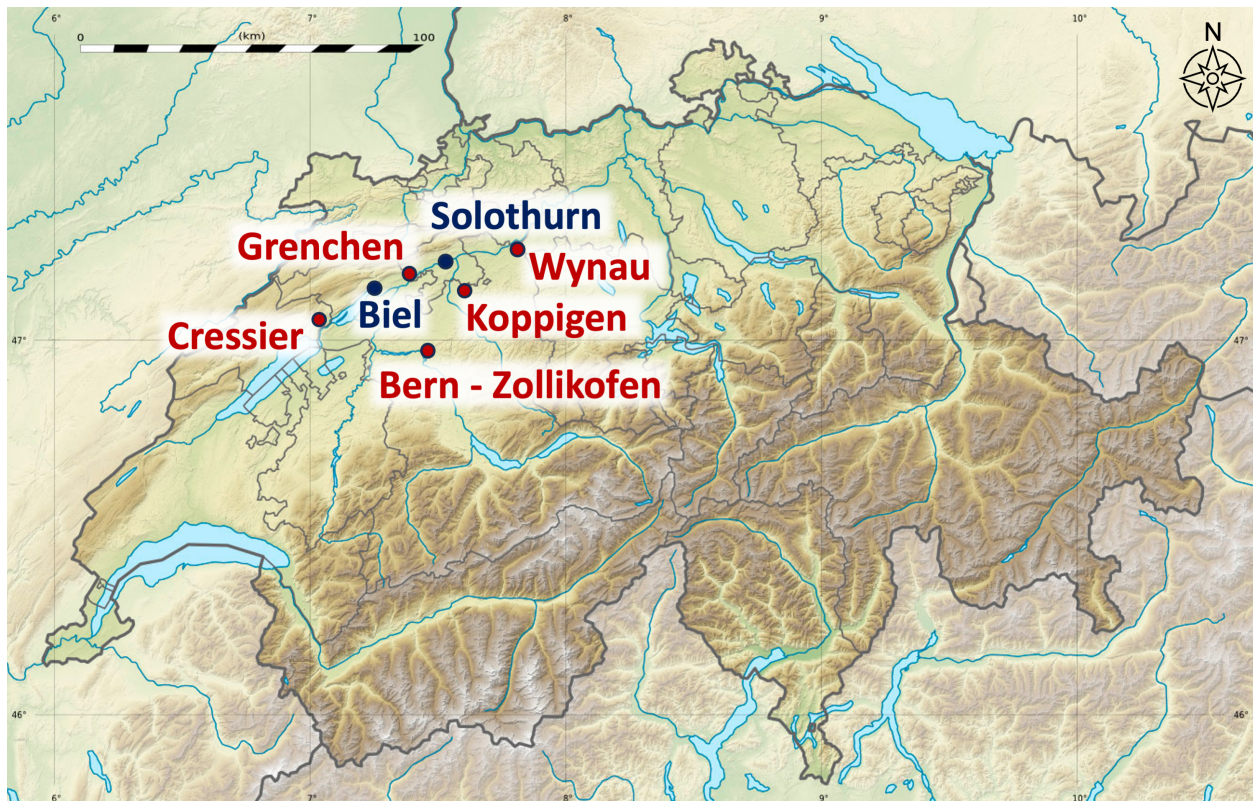

Figure 2: Map of Switzerland representing the location of the two Alpine swift colonies in Biel and Solothurn and the five meteorological stations Bern-Zollikofen, Cressier, Grenchen, Koppigen, Wynau.

[Base map] ([https://commons.wikimedia.org/wiki/File:Switzerland\\_relief\\_location\\_map.jpg](https://commons.wikimedia.org/wiki/File:Switzerland_relief_location_map.jpg)) credits to Eric Gaba [Wikimedia Commons user: Sting] (<https://commons.wikimedia.org/wiki/User:Sting>) and

Wikimedia [Commons user: NordNordWest] (<https://commons.wikimedia.org/wiki/User:NordNordWest>).  
This file is licensed under the Creative Commons Attribution-Share Alike 3.0 Unported license.

## PCA results

A Principal Component Analysis was run between average daily temperature and daily rain.

```
### PCA

# Principal component analyses to create a variable
# with temperature and rain together.
clim_pca1 <- princomp(data_clim_sub[, c("T.daily.mean", "Rain.daily")],
  cor = TRUE, scores = TRUE
)

summary(clim_pca1)
```

```
## Importance of components:
##                Comp.1    Comp.2
## Standard deviation    1.0879599 0.9035171
## Proportion of Variance 0.5918284 0.4081716
## Cumulative Proportion 0.5918284 1.0000000
```

```
# tr_comp_1 explains 59% of the variance
clim_pca1$loadings
```

```
##
## Loadings:
##                Comp.1 Comp.2
## T.daily.mean    0.707  0.707
## Rain.daily     -0.707  0.707
##
##                Comp.1 Comp.2
## SS loadings      1.0    1.0
## Proportion Var   0.5    0.5
## Cumulative Var   0.5    1.0
```

```
# tr_comp_1 = from cold and rainy to warm and dry day
# adding the new variable to the climate dataset
data_pca1 <- as.data.frame(clim_pca1$scores)
colnames(data_pca1) <- c("tr_comp_1", "tr_comp_2")
data_clim_sub <- cbind(data_clim_sub, data_pca1)
```

The loadings result shows that the Component 1 has positive values with warm days and dry days, and negative values cold and rainy days.

The importance of the components results show that the component 1 explains 59.2% of the variation in the climatic data.

## The climwin approach

The overall approach for the climwin analysis is to compare the support by the data for competing hypotheses and to formalize them into regression models (van de Pol et al., 2016).

Competing models are based upon a baseline model (called also null model, a model without weather effects) and ranked using the deltaAICc, or the difference in terms of the Akaike Information Criterion values calculated for a small sample size between the candidate model and baseline model.

Climwin presents the models using the deltaAICc value relative to the baseline model (AICc of the candidate model - AICc of the baseline model). Therefore, a model that is more supported than the baseline model will have a negative deltaAICc value. On the same hand the model with the best support from the data, usually with lowest AICc, will be shown as the model with lowest deltaAICc in the climwin output.

The baseline model was a linear mixed model with the trait (wing length, sternum length or body mass) of the nestlings at 50 days of age in relation to brood size, colony of hatching, hatching day, and exact age of measurement (range 45-55 days of age). The function slidingwin creates a candidate set of competing models testing windows of different lengths for the weather variable of interest, in this study the mean daily ambient temperature (°C).

Non-linear effects of temperature on the traits were taken into account by checking for both linear and quadratic trends. This is mentioned in the climwin output as func = lin (only linear term) func = quad (linear and quadratic terms).

For the analyses we used an individual specific time window, based on the date when the nestlings had 50 days. We then looked for windows between this reference date and 50 days before.

### Base model

According to (van de Pol et al. 2016), we built a base model that includes variables that can affect the traits. As random effects, we included brood ID and year as a factor to account for non-independence among nestlings belonging to the same brood and nestlings hatched in the same year, respectively.

### Baseline models

```
# double check base models are the same as in script 01

wing_50_basemod <- lme4::lmer(
  wing_50 ~
    brood_size + colony +
    hatch_doy_sc + age_days_sc50 +
    (1 | year_f) + (1 | nestcode_rearing),
  control = lmerControl(optimizer = "bobyqa", optCtrl = list(maxfun = 1e+06)),
  data = data_am_nestlings_wing_50
)

sternum_50_basemod <- lme4::lmer(
  sternum_50 ~
    brood_size + colony +
    age_days_sc50 + hatch_doy_sc +
    (1 | year_f) + (1 | nestcode_rearing),
  control = lmerControl(optimizer = "bobyqa", optCtrl = list(maxfun = 1e+06)),
  data = data_am_nestlings_sternum_50
)

mass_50_basemod <- lme4::lmer(
```

```

mass_50 ~
  brood_size + colony +
  hatch_doy_sc + age_days_sc50 +
  (1 | year_f) + (1 | nestcode_rearing),
control = lmerControl(optimizer = "bobyqa", optCtrl = list(maxfun = 1e+06)),
data = data_am_nestlings_mass_50
)

```

## Finding the best window

Using the function `slidingwin` allows to search for the best climatic window

```

# -----
# ----- WING -----

wing_50_sw <- slidingwin(
  baseline = wing_50_basemod,
  xvar = list(
    tr_pc1 = data_clim_sub$tr_comp_1,
    temp_mean = data_clim_sub$T.daily.mean,
    rain_mean = data_clim_sub$Rain.daily,
    wind_mean = data_clim_sub$Wind.daily.mean
  ),
  stat = c("mean"),
  func = c("lin", "quad"),
  type = "relative", # relative to the individual
  range = c(50, 0),
  cinterval = "day",
  cdate = data_clim_sub$date,
  bdate = data_am_nestlings_wing_50$date_50days
)
save(wing_50_sw, file = "output/wing_50_sw.rda")

# -----
# ----- STERNUM -----

sternum_50_sw <- slidingwin(
  baseline = sternum_50_basemod,
  xvar = list(
    tr_pc1 = data_clim_sub$tr_comp_1,
    temp_mean = data_clim_sub$T.daily.mean,
    rain_mean = data_clim_sub$Rain.daily,
    wind_mean = data_clim_sub$Wind.daily.mean
  ),
  stat = c("mean"),
  func = c("lin", "quad"),
  type = "relative",
  range = c(50, 0),
  cinterval = "day",
  cdate = data_clim_sub$date,
  bdate = data_am_nestlings_sternum_50$date_50days
)

```

```

save(sternum_50_sw, file = "output/sternum_50_sw.rda")

# -----
# ----- MASS -----

mass_50_sw <- slidingwin(
  baseline = mass_50_basemod,
  xvar = list(
    tr_pc1 = data_clim_sub$tr_comp_1,
    temp_mean = data_clim_sub$T.daily.mean,
    rain_mean = data_clim_sub$Rain.daily,
    wind_mean = data_clim_sub$Wind.daily.mean
  ),
  stat = c("mean"),
  func = c("lin", "quad"),
  type = "relative",
  range = c(50, 0),
  cinterval = "day",
  cdate = data_clim_sub$date,
  bdate = data_am_nestlings_mass_50$date_50days
)
save(mass_50_sw, file = "output/mass_50_sw.rda")

```

## Investigating the models

Loading the models

```

model_load <- list.files("output/", pattern = "*.rda", full.names = FALSE)
for (i in seq_len(length(model_load))) {
  assign(model_load[i], load(paste0("output/", model_load[i])))
}

```

**Wing length at 50 days** The linear+quadratic term for the PC1 better explains the variation in the data (deltaAICc has the lowest value), sorted by deltaAICc such that the best supported model is on top.

```

wing_50_mod_combos <- (wing_50_sw$combos)

wing_50_mod_combos[order(wing_50_mod_combos$DeltaAICc), ]

```

| ##   | response | climate   | type     | stat | func | DeltaAICc | WindowOpen | WindowClose |
|------|----------|-----------|----------|------|------|-----------|------------|-------------|
| ## 5 | wing_50  | tr_pc1    | relative | mean | quad | -54.89    | 50         | 4           |
| ## 1 | wing_50  | tr_pc1    | relative | mean | lin  | -51.78    | 48         | 2           |
| ## 2 | wing_50  | temp_mean | relative | mean | lin  | -44.85    | 44         | 0           |
| ## 6 | wing_50  | temp_mean | relative | mean | quad | -44.06    | 46         | 1           |
| ## 3 | wing_50  | rain_mean | relative | mean | lin  | -35.67    | 50         | 4           |
| ## 7 | wing_50  | rain_mean | relative | mean | quad | -33.13    | 50         | 4           |
| ## 8 | wing_50  | wind_mean | relative | mean | quad | -30.09    | 43         | 16          |
| ## 4 | wing_50  | wind_mean | relative | mean | lin  | -20.50    | 50         | 16          |

```
# to save the row name of the model with the lowest DeltaAICc
n_bestmod_wing_50 <- as.numeric(rownames(
  wing_50_mod_combos[order(wing_50_mod_combos$DeltaAICc), ]
))[1]
```

**The best quadratic models** The 30 best windows for the linear+quadratic models sorted by deltaAICc. To investigate any other tested hypothesis we can simply replace the number on the left or in the double square brackets with the corresponding list number.

```
head(wing_50_sw[[n_bestmod_wing_50]]$Dataset, 30)
```

| ##      | deltaAICc | WindowOpen | WindowClose | ModelBeta | Std.Error     | ModelBetaQ | Std.ErrorQ  | ModelBetaC  |            |
|---------|-----------|------------|-------------|-----------|---------------|------------|-------------|-------------|------------|
| ## 1322 | -54.89092 | 50         | 4           | 6.551631  | 0.3361476     | 11.0387223 | 0.4863652   | NA          |            |
| ## 1223 | -54.84205 | 48         | 2           | 12.455726 | 0.3366066     | 2.7489047  | 0.4859876   | NA          |            |
| ## 1323 | -54.76311 | 50         | 3           | 7.868213  | 0.3362721     | 9.3874591  | 0.4861168   | NA          |            |
| ## 1325 | -54.45219 | 50         | 1           | 9.825671  | 0.3363533     | 7.5729701  | 0.4851552   | NA          |            |
| ## 1324 | -54.41977 | 50         | 2           | 9.981766  | 0.3363880     | 6.7217760  | 0.4856579   | NA          |            |
| ## 1224 | -54.32639 | 48         | 1           | 12.650438 | 0.3366280     | 2.9862848  | 0.4856233   | NA          |            |
| ## 1272 | -54.08562 | 49         | 3           | 8.544611  | 0.3364165     | 8.2142865  | 0.4861785   | NA          |            |
| ## 1222 | -54.03660 | 48         | 3           | 10.263727 | 0.3365971     | 5.4752835  | 0.4866291   | NA          |            |
| ## 1273 | -53.96047 | 49         | 2           | 10.706399 | 0.3365262     | 5.4821138  | 0.4856960   | NA          |            |
| ## 1271 | -53.87250 | 49         | 4           | 7.190108  | 0.3363290     | 9.8540777  | 0.4864658   | NA          |            |
| ## 1274 | -53.68233 | 49         | 1           | 10.674798 | 0.3365185     | 6.0797486  | 0.4852664   | NA          |            |
| ## 1174 | -52.90919 | 47         | 2           | 12.437476 | 0.3367720     | 2.1534341  | 0.4856307   | NA          |            |
| ## 1225 | -52.84705 | 48         | 0           | 14.456870 | 0.3368176     | 0.3027216  | 0.4858772   | NA          |            |
| ## 1221 | -52.84061 | 48         | 4           | 8.940424  | 0.3366223     | 6.9043294  | 0.4871025   | NA          |            |
| ## 1175 | -52.64052 | 47         | 1           | 12.588455 | 0.3367644     | 2.5504995  | 0.4852247   | NA          |            |
| ## 1326 | -52.30213 | 50         | 0           | 11.662259 | 0.3366616     | 4.8728030  | 0.4856115   | NA          |            |
| ## 1126 | -51.69699 | 46         | 2           | 12.483527 | 0.3369035     | 1.6598150  | 0.4853873   | NA          |            |
| ## 1127 | -51.66755 | 46         | 1           | 12.552901 | 0.3368703     | 2.2735931  | 0.4849586   | NA          |            |
| ## 1173 | -51.55800 | 47         | 3           | 10.411740 | 0.3368546     | 4.4021966  | 0.4863902   | NA          |            |
| ## 1275 | -51.55052 | 49         | 0           | 12.551106 | 0.3367897     | 3.2700689  | 0.4856945   | NA          |            |
| ## 1176 | -51.26785 | 47         | 0           | 14.255534 | 0.3369472     | 0.1701031  | 0.4854594   | NA          |            |
| ## 1079 | -50.76999 | 45         | 2           | 14.147982 | 0.3371526     | -1.1918020 | 0.4852511   | NA          |            |
| ## 1080 | -50.35263 | 45         | 1           | 14.108448 | 0.3371538     | -0.4976083 | 0.4849790   | NA          |            |
| ## 1128 | -50.35040 | 46         | 0           | 14.079579 | 0.3370639     | 0.1735787  | 0.4851918   | NA          |            |
| ## 1125 | -50.23049 | 46         | 3           | 10.591392 | 0.3370209     | 3.6320887  | 0.4861570   | NA          |            |
| ## 1172 | -50.15347 | 47         | 4           | 9.122739  | 0.3369127     | 5.6884318  | 0.4869242   | NA          |            |
| ## 1081 | -49.36892 | 45         | 0           | 15.294356 | 0.3372935     | -2.0929514 | 0.4851141   | NA          |            |
| ## 1124 | -49.10548 | 46         | 4           | 9.264878  | 0.3370408     | 5.0356618  | 0.4866230   | NA          |            |
| ## 1078 | -48.93918 | 45         | 3           | 12.283747 | 0.3373236     | 0.8309290  | 0.4859783   | NA          |            |
| ## 1321 | -47.56793 | 50         | 5           | 5.641579  | 0.3366908     | 10.7798666 | 0.4869438   | NA          |            |
| ##      | ModelInt  | Function   | Furthest    | Closest   | Statistics    | Type K     | ModWeight   | sample.size | Randomised |
| ## 1322 | 217.0848  | quad       | 50          | 0         | mean relative | 0          | 0.084572833 | 25          | no         |
| ## 1223 | 216.9736  | quad       | 50          | 0         | mean relative | 0          | 0.082531069 | 25          | no         |
| ## 1323 | 217.0928  | quad       | 50          | 0         | mean relative | 0          | 0.079337301 | 25          | no         |
| ## 1325 | 216.8889  | quad       | 50          | 0         | mean relative | 0          | 0.067914088 | 25          | no         |
| ## 1324 | 217.0447  | quad       | 50          | 0         | mean relative | 0          | 0.066822304 | 25          | no         |
| ## 1224 | 216.8182  | quad       | 50          | 0         | mean relative | 0          | 0.063774173 | 25          | no         |
| ## 1272 | 217.0634  | quad       | 50          | 0         | mean relative | 0          | 0.056540774 | 25          | no         |
| ## 1222 | 217.0684  | quad       | 50          | 0         | mean relative | 0          | 0.055171766 | 25          | no         |
| ## 1273 | 216.9947  | quad       | 50          | 0         | mean relative | 0          | 0.053111227 | 25          | no         |



|    |      |          |      |    |   |               |   |             |    |    |
|----|------|----------|------|----|---|---------------|---|-------------|----|----|
| ## | 1271 | 217.0835 | quad | 50 | 0 | mean relative | 0 | 0.050825589 | 25 | no |
| ## | 1274 | 216.8472 | quad | 50 | 0 | mean relative | 0 | 0.046215462 | 25 | no |
| ## | 1174 | 217.0212 | quad | 50 | 0 | mean relative | 0 | 0.031398094 | 25 | no |
| ## | 1225 | 216.8362 | quad | 50 | 0 | mean relative | 0 | 0.030437574 | 25 | no |
| ## | 1221 | 217.1366 | quad | 50 | 0 | mean relative | 0 | 0.030339628 | 25 | no |
| ## | 1175 | 216.8444 | quad | 50 | 0 | mean relative | 0 | 0.027451227 | 25 | no |
| ## | 1326 | 216.9188 | quad | 50 | 0 | mean relative | 0 | 0.023178328 | 25 | no |
| ## | 1126 | 217.0579 | quad | 50 | 0 | mean relative | 0 | 0.017126836 | 25 | no |
| ## | 1127 | 216.8582 | quad | 50 | 0 | mean relative | 0 | 0.016876543 | 25 | no |
| ## | 1173 | 217.1755 | quad | 50 | 0 | mean relative | 0 | 0.015977034 | 25 | no |
| ## | 1275 | 216.8741 | quad | 50 | 0 | mean relative | 0 | 0.015917366 | 25 | no |
| ## | 1176 | 216.8405 | quad | 50 | 0 | mean relative | 0 | 0.013819467 | 25 | no |
| ## | 1079 | 217.0713 | quad | 50 | 0 | mean relative | 0 | 0.010774101 | 25 | no |
| ## | 1080 | 216.8755 | quad | 50 | 0 | mean relative | 0 | 0.008744850 | 25 | no |
| ## | 1128 | 216.8407 | quad | 50 | 0 | mean relative | 0 | 0.008735114 | 25 | no |
| ## | 1125 | 217.2351 | quad | 50 | 0 | mean relative | 0 | 0.008226783 | 25 | no |
| ## | 1172 | 217.2726 | quad | 50 | 0 | mean relative | 0 | 0.007915981 | 25 | no |
| ## | 1081 | 216.8539 | quad | 50 | 0 | mean relative | 0 | 0.005347413 | 25 | no |
| ## | 1124 | 217.3224 | quad | 50 | 0 | mean relative | 0 | 0.004687464 | 25 | no |
| ## | 1078 | 217.2487 | quad | 50 | 0 | mean relative | 0 | 0.004313467 | 25 | no |
| ## | 1321 | 217.3428 | quad | 50 | 0 | mean relative | 0 | 0.002173012 | 25 | no |

The best windows (deltaAICc difference from the best model < 2) for the linear+quadratic models sorted by deltaAICc. All models with the lowest AICc present very comparable windows:

```
wing_50_bestmod <- subset(
  wing_50_sw[[n_bestmod_wing_50]]$Dataset,
  deltaAICc < wing_50_sw[[n_bestmod_wing_50]]$Dataset$deltaAICc[1] + 2
)
wing_50_bestmod
```

| ## | deltaAICc | WindowOpen | WindowClose | ModelBeta | Std.Error  | ModelBetaQ    | Std.ErrorQ | ModelBetaC |             |            |
|----|-----------|------------|-------------|-----------|------------|---------------|------------|------------|-------------|------------|
| ## | 1322      | -54.89092  | 50          | 4         | 6.551631   | 0.3361476     | 11.038722  | 0.4863652  | NA          |            |
| ## | 1223      | -54.84205  | 48          | 2         | 12.455726  | 0.3366066     | 2.748905   | 0.4859876  | NA          |            |
| ## | 1323      | -54.76311  | 50          | 3         | 7.868213   | 0.3362721     | 9.387459   | 0.4861168  | NA          |            |
| ## | 1325      | -54.45219  | 50          | 1         | 9.825671   | 0.3363533     | 7.572970   | 0.4851552  | NA          |            |
| ## | 1324      | -54.41977  | 50          | 2         | 9.981766   | 0.3363880     | 6.721776   | 0.4856579  | NA          |            |
| ## | 1224      | -54.32639  | 48          | 1         | 12.650438  | 0.3366280     | 2.986285   | 0.4856233  | NA          |            |
| ## | 1272      | -54.08562  | 49          | 3         | 8.544611   | 0.3364165     | 8.214286   | 0.4861785  | NA          |            |
| ## | 1222      | -54.03660  | 48          | 3         | 10.263727  | 0.3365971     | 5.475283   | 0.4866291  | NA          |            |
| ## | 1273      | -53.96047  | 49          | 2         | 10.706399  | 0.3365262     | 5.482114   | 0.4856960  | NA          |            |
| ## | 1271      | -53.87250  | 49          | 4         | 7.190108   | 0.3363290     | 9.854078   | 0.4864658  | NA          |            |
| ## | 1274      | -53.68233  | 49          | 1         | 10.674798  | 0.3365185     | 6.079749   | 0.4852664  | NA          |            |
| ## | 1174      | -52.90919  | 47          | 2         | 12.437476  | 0.3367720     | 2.153434   | 0.4856307  | NA          |            |
| ## | ModelInt  | Function   | Furthest    | Closest   | Statistics | Type          | K          | ModWeight  | sample.size | Randomised |
| ## | 1322      | 217.0848   | quad        | 50        | 0          | mean relative | 0          | 0.08457283 | 25          | no         |
| ## | 1223      | 216.9736   | quad        | 50        | 0          | mean relative | 0          | 0.08253107 | 25          | no         |
| ## | 1323      | 217.0928   | quad        | 50        | 0          | mean relative | 0          | 0.07933730 | 25          | no         |
| ## | 1325      | 216.8889   | quad        | 50        | 0          | mean relative | 0          | 0.06791409 | 25          | no         |
| ## | 1324      | 217.0447   | quad        | 50        | 0          | mean relative | 0          | 0.06682230 | 25          | no         |
| ## | 1224      | 216.8182   | quad        | 50        | 0          | mean relative | 0          | 0.06377417 | 25          | no         |
| ## | 1272      | 217.0634   | quad        | 50        | 0          | mean relative | 0          | 0.05654077 | 25          | no         |

|    |      |          |      |    |   |                 |            |    |    |
|----|------|----------|------|----|---|-----------------|------------|----|----|
| ## | 1222 | 217.0684 | quad | 50 | 0 | mean relative 0 | 0.05517177 | 25 | no |
| ## | 1273 | 216.9947 | quad | 50 | 0 | mean relative 0 | 0.05311123 | 25 | no |
| ## | 1271 | 217.0835 | quad | 50 | 0 | mean relative 0 | 0.05082559 | 25 | no |
| ## | 1274 | 216.8472 | quad | 50 | 0 | mean relative 0 | 0.04621546 | 25 | no |
| ## | 1174 | 217.0212 | quad | 50 | 0 | mean relative 0 | 0.03139809 | 25 | no |

**Windows plot** It's possible to extract the time windows of all the best supported models (i.e. multi-model inference). This panel shows the opening and closing points of the time windows that were best supported by the data, here those models that made up 95% model confidence set.

```
plotwin(wing_50_sw[[n_bestmod_wing_50]]$Dataset)
```

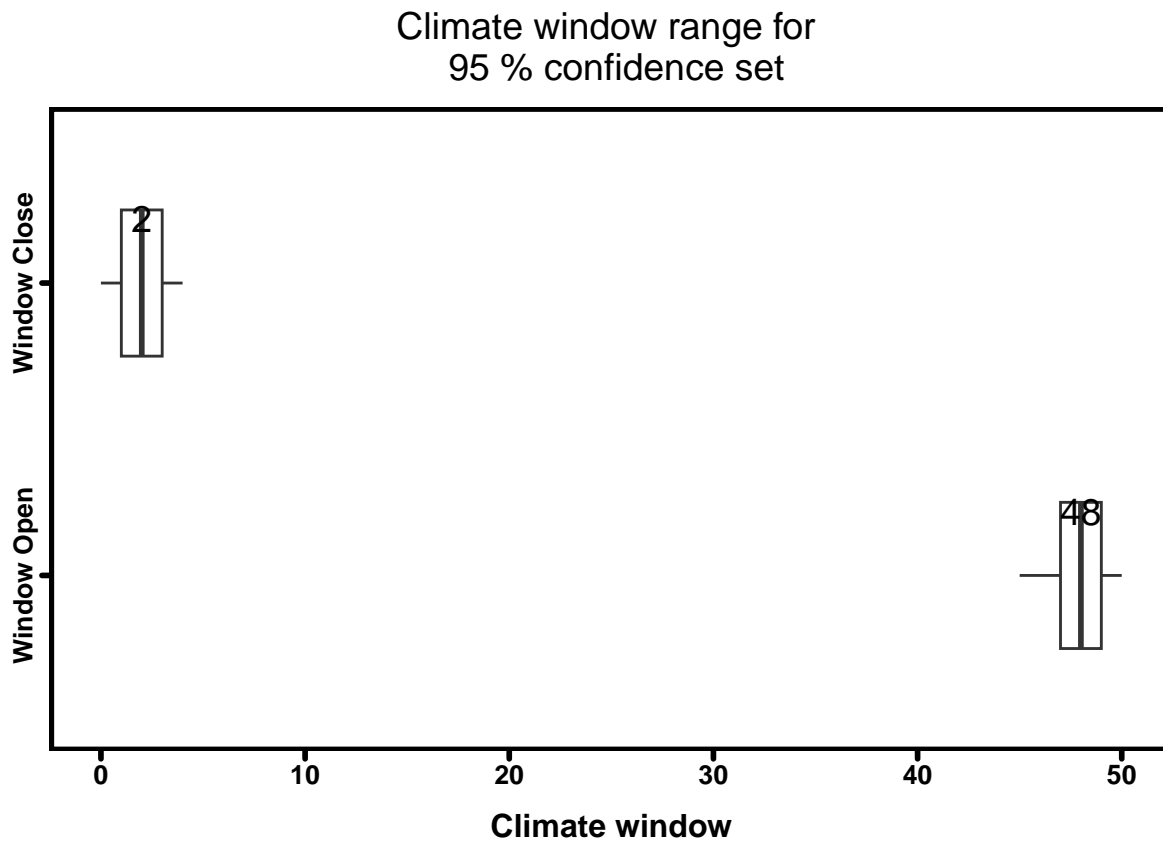

**Delta plot** The variation in deltaAICc between time windows can be better investigated using the following plot:

```
plotdelta(  
  dataset =  
    wing_50_sw[[n_bestmod_wing_50]]$Dataset, arrow = TRUE  
)
```

$\Delta\text{AICc}$  (compared to null model)

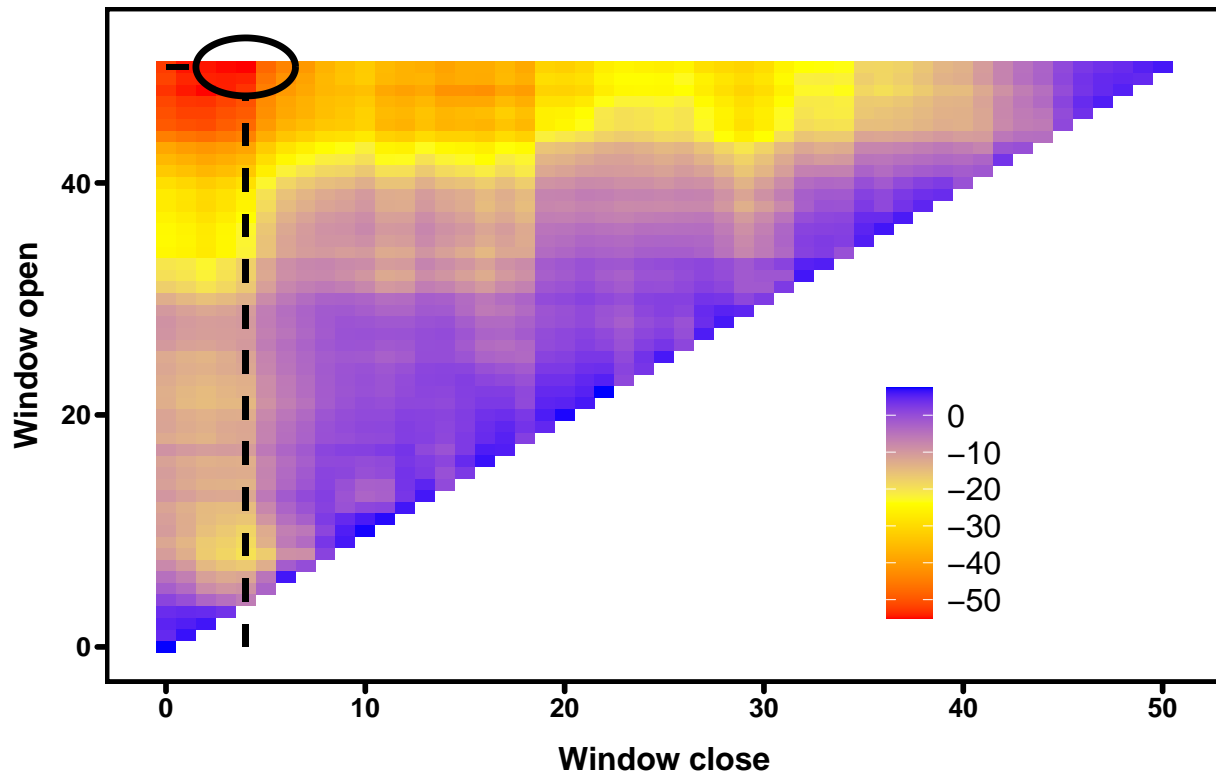

Warmer areas shows values with the lowest deltaAICc (i.e. “best models”). As explained by van de Pol et al., 2016, these deltaAICc landscapes of the different time windows shows multiple peaks (red areas) instead of a clear single peak. This can indicate the presence of multiple (e.g. possibly both long- and short-lag) weather signals within the same weather variable, but it can also occur due to collinearity or chance.

The evidence for multiple signals can be therefore investigated by adding the best supported of the weather windows to the baseline model, and re-fitting all the different time windows again: this tests whether there is still strong model support for the second best (e.g. short-lag) weather window once the other best supported (e.g. long-lag) weather window has been accounted for in the baseline model (here in the Step 2).

**Beta plot** This panel shows the model support (deltaAICc) for all fitted time windows tried, shown for each combination of Window open (y-axis) and Window close (x-axis). Models with the lowest deltaAICc (red) are the best supported (colours show the deltaAICc levels compared to the null model, see legend). Strongly supported windows will often be grouped together.

```
plotbetas(wing_50_sw[[n_bestmod_wing_50]]$Dataset, arrow = TRUE)
```

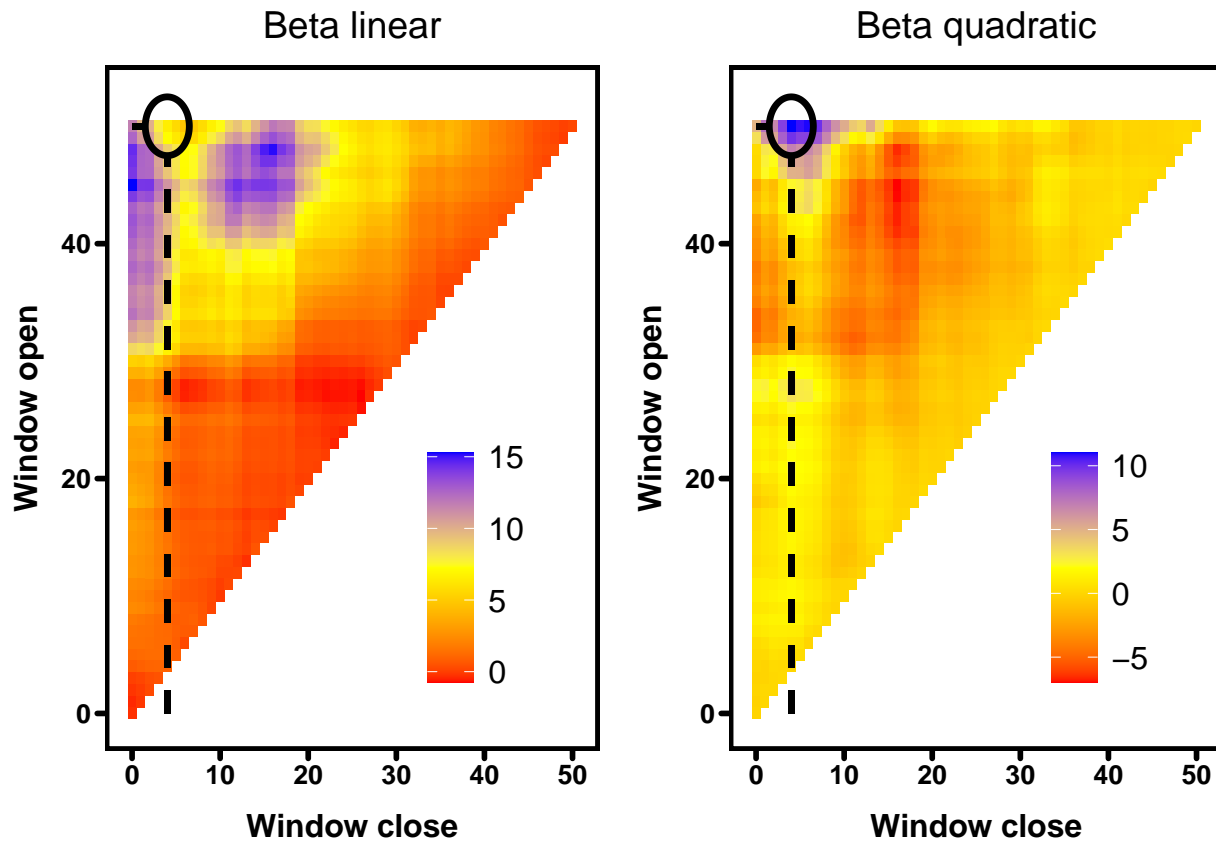

**Autocollinearity** Correlation between the mean temperature during the best supported time window and the mean temperature over all other time windows.

```
autocoll <- autowin(
  reference = wing_50_sw[[n_bestmod_wing_50]],
  baseline = wing_50_basemod,
  xvar = list(
    tr_pcl = data_clim_sub$tr_comp_1
  ),
  type = "relative",
  range = c(50, 0),
  stat = "mean",
  cdate = data_clim_sub$date,
  bdate = data_am_nestlings_wing_50$date_50days,
  func = "quad",
  # cmissing = FALSE,
  cinterval = "day"
)

save(autocoll, file = "output/wing_50_autocoll.rda")
```

```
load(file = "output/wing_50_autocoll.rda")
plotcor(autocoll, type = "A", arrow = TRUE)
```

## Correlation between single window and all other windows

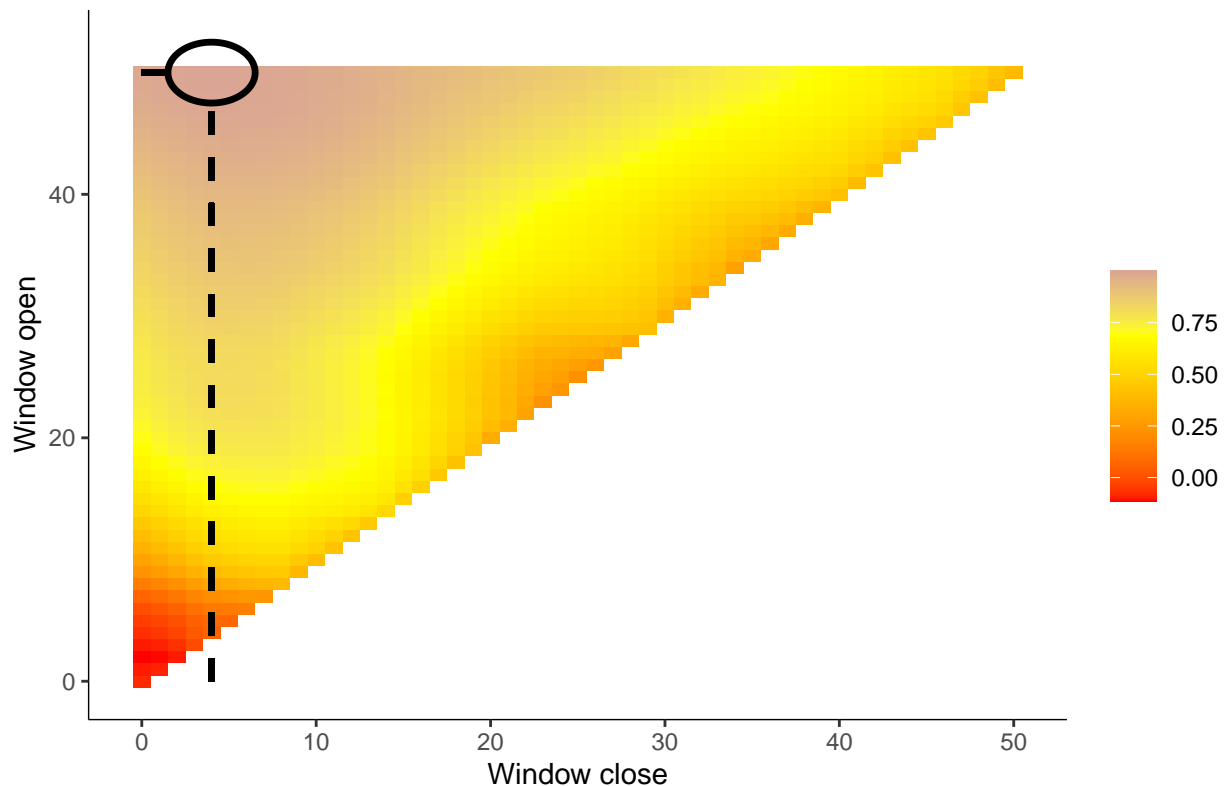

**Randwin** Using `randwin()` to randomize the identity of the nestling, we are able to check if the window that was found before is actually important, or the relationship was just random.

```
# Performing randomization to identify
# likelihood of of signals occurring by chance

wing_50_rand1000 <- randwin(
  repeats = 1000,
  baseline = wing_50_basemod,
  xvar = list(tr_pcl = data_clim_sub$str_comp_1),
  stat = c("mean"),
  func = c("quad"),
  type = "relative", # relative to the individual
  range = c(50, 0),
  cinterval = "day",
  cdate = data_clim_sub$date,
  bdate = data_am_nestlings_wing_50$date_50days,
  cmissing = FALSE
)
save(wing_50_rand1000, file = "output/wing_50_rand1000.rda")

load("output/wing_50_rand1000.rda")

climwin::pvalue(
  datasetrand = wing_50_rand1000[[1]],
  dataset = wing_50_sw[[n_bestmod_wing_50]]$Dataset,
```

```
metric = "AIC",
sample.size = wing_50_sw[[n_bestmod_wing_50]]$Dataset$sample.size[1]
# sample size = number of years
)
```

```
## [1] "<0.001"
```

This panel shows a histogram of all  $\Delta AICc$  values from all models run on the randomized (in grey) and the  $\Delta AICc$  of the best model fitted on the observed data (dashed line). The best climate window in the randomized data is by definition a false positive, as the randomization procedure removes any climate signal from the data. The percentage of randomizations that generates a  $\Delta AICc$  value that is at least as low as the  $\Delta AICc$  value of the best model fitted to the observed data (P value above) is a measure of how likely it is that one obtained the observed  $\Delta AICc$  by chance and thus whether the signal is likely to be real or not. In our case we can say that the candidate signal is very unlikely to be a false positive:  $P < 0.001$ .

```
climwin::plothist(
  datasetrand = wing_50_rand1000[[1]],
  dataset = wing_50_sw[[n_bestmod_wing_50]]$Dataset
)
```

```
## Warning: The dot-dot notation (`.density.`) was deprecated in ggplot2 3.4.0.
## i Please use `after_stat(density)` instead.
## i The deprecated feature was likely used in the climwin package.
## Please report the issue at <https://github.com/LiamDBailey/climwin/issues>.
## This warning is displayed once every 8 hours.
## Call `lifecycle::last_lifecycle_warnings()` to see where this warning was generated.
```

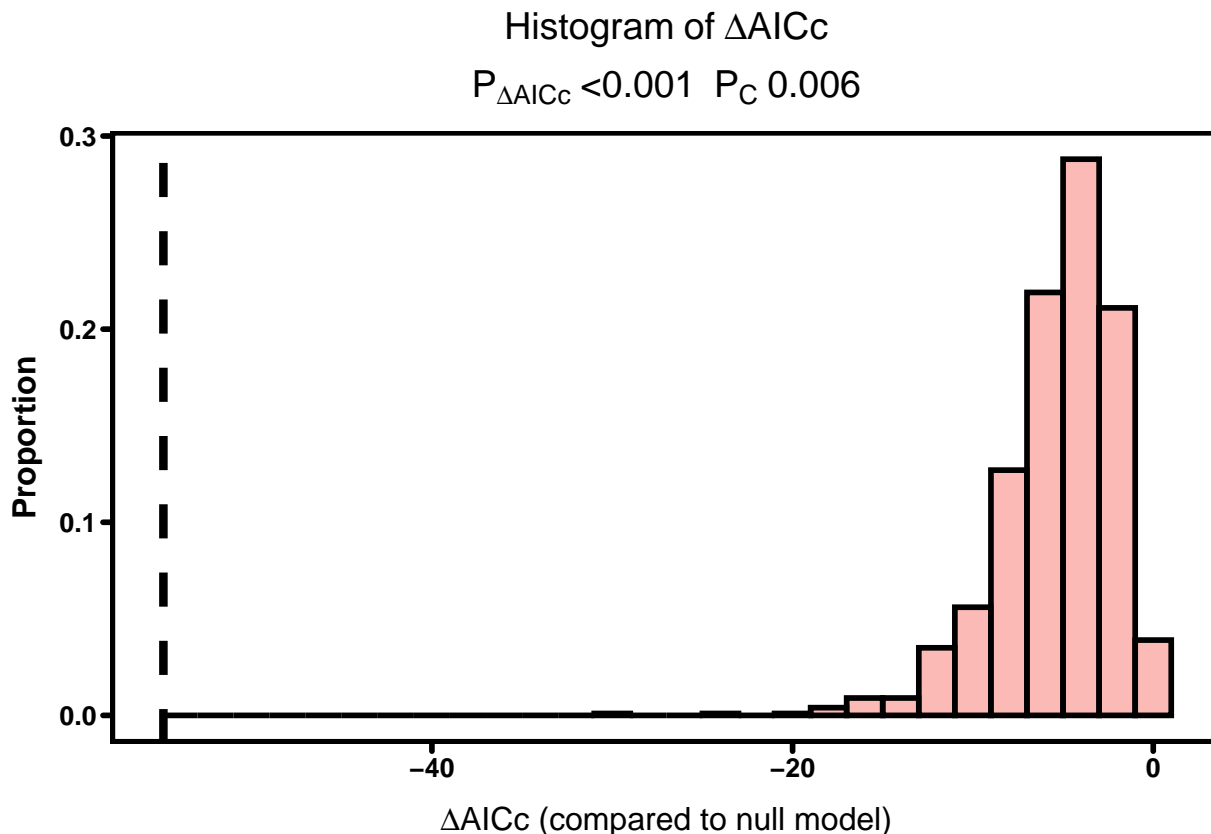

**Extracting the best window** The best window was obtained by averaging the opening and closing dates for all the best models ( $\Delta AICc < 2$ ). The best window opened 48.92 (mean; SD: 1) and closed 2.33 (mean; SD: 1.07) days before the 50 days measurement, which corresponds to the age of the nestling of 1 and 48 days old.

```
wing_50_bestsw <- singlewin(
  baseline = wing_50_basemod,
  xvar = list(
    tr_pc1 = data_clim_sub$tr_comp_1
  ),
  stat = c("mean"),
  func = c("quad"),
  type = "relative",
  range = c(
    round(mean(wing_50_bestmod$WindowOpen), 0),
    round(mean(wing_50_bestmod$WindowClose), 0)
  ),
  cinterval = "day",
  cdate = data_clim_sub$date,
  bdate = data_am_nestlings_wing_50$date_50days
)
```

```
## fixed-effect model matrix is rank deficient so dropping 2 columns / coefficients
```

```
# adding the climatic variable to the wing_50 dataset
data_am_nestlings_wing_50$signal_for_wing_50 <-
  wing_50_bestsw$BestModelData$climate
```

**Sternum length at 50 days** The linear+quadratic term for the PC1 better explains the variation in the data ( $\Delta AICc$  has the lowest value), sorted by  $\Delta AICc$  such that the best supported model is on top.

```
sternum_50_mod_combos <- (sternum_50_sw$combos)

sternum_50_mod_combos[order(sternum_50_mod_combos$DeltaAICc), ]
```

| ##   | response   | climate   | type     | stat | func | DeltaAICc | WindowOpen | WindowClose |
|------|------------|-----------|----------|------|------|-----------|------------|-------------|
| ## 5 | sternum_50 | tr_pc1    | relative | mean | quad | -6.92     | 31         | 16          |
| ## 1 | sternum_50 | tr_pc1    | relative | mean | lin  | -5.23     | 50         | 16          |
| ## 8 | sternum_50 | wind_mean | relative | mean | quad | -3.74     | 45         | 16          |
| ## 2 | sternum_50 | temp_mean | relative | mean | lin  | -2.64     | 48         | 14          |
| ## 4 | sternum_50 | wind_mean | relative | mean | lin  | -1.15     | 45         | 20          |
| ## 3 | sternum_50 | rain_mean | relative | mean | lin  | 0.79      | 29         | 16          |
| ## 7 | sternum_50 | rain_mean | relative | mean | quad | 3.84      | 43         | 2           |
| ## 6 | sternum_50 | temp_mean | relative | mean | quad | 4.93      | 49         | 14          |

```
n_bestmod_sternum_50 <- as.numeric(rownames(
  sternum_50_mod_combos[order(sternum_50_mod_combos$DeltaAICc), ]
))[1]
```

**The best quadratic models** The 30 best windows for the linear+quadratic models sorted by  $\Delta AICc$ . To investigate any other tested hypothesis we can simply replace the number on the left or in the double square brackets with the corresponding list number.

```
head(sternum_50_sw[[n_bestmod_sternum_50]]$Dataset, 30)
```

| ##      | deltaAICc | WindowOpen | WindowClose | ModelBeta | Std.Error     | ModelBetaQ | Std.ErrorQ  | ModelBetaC |             |            |
|---------|-----------|------------|-------------|-----------|---------------|------------|-------------|------------|-------------|------------|
| ## 512  | -6.921814 | 31         | 16          | 0.6439868 | 0.04890045    | -0.4618389 | 0.06793423  | NA         |             |            |
| ## 513  | -6.567573 | 31         | 15          | 0.6923178 | 0.04888465    | -0.4919496 | 0.06791674  | NA         |             |            |
| ## 545  | -6.054905 | 32         | 16          | 0.6681248 | 0.04894310    | -0.4998184 | 0.06789905  | NA         |             |            |
| ## 514  | -5.998077 | 31         | 14          | 0.7277946 | 0.04889078    | -0.5134053 | 0.06788579  | NA         |             |            |
| ## 546  | -5.799299 | 32         | 15          | 0.7153519 | 0.04891801    | -0.5325067 | 0.06787628  | NA         |             |            |
| ## 974  | -5.526967 | 43         | 16          | 0.8627472 | 0.04896451    | -0.7063225 | 0.06795367  | NA         |             |            |
| ## 1019 | -5.476339 | 44         | 16          | 0.8637459 | 0.04896773    | -0.6758509 | 0.06798146  | NA         |             |            |
| ## 1065 | -5.469180 | 45         | 16          | 0.8657824 | 0.04898187    | -0.6529619 | 0.06801712  | NA         |             |            |
| ## 1066 | -5.062738 | 45         | 15          | 0.8729279 | 0.04899598    | -0.6545456 | 0.06799652  | NA         |             |            |
| ## 930  | -5.000570 | 42         | 16          | 0.8194125 | 0.04897776    | -0.6897538 | 0.06795795  | NA         |             |            |
| ## 511  | -5.000428 | 31         | 17          | 0.5647773 | 0.04895028    | -0.4018979 | 0.06797507  | NA         |             |            |
| ## 1018 | -4.955888 | 44         | 17          | 0.8356887 | 0.04897945    | -0.6573560 | 0.06805801  | NA         |             |            |
| ## 975  | -4.940319 | 43         | 15          | 0.8651537 | 0.04897529    | -0.7012805 | 0.06793445  | NA         |             |            |
| ## 1064 | -4.939830 | 45         | 17          | 0.8360772 | 0.04899397    | -0.6333999 | 0.06809447  | NA         |             |            |
| ## 1020 | -4.897758 | 44         | 15          | 0.8637132 | 0.04898299    | -0.6678083 | 0.06796395  | NA         |             |            |
| ## 547  | -4.855831 | 32         | 14          | 0.7328238 | 0.04892918    | -0.5384602 | 0.06786275  | NA         |             |            |
| ## 526  | -4.816052 | 31         | 2           | 0.9740741 | 0.04896630    | -0.8003427 | 0.06818197  | NA         |             |            |
| ## 1067 | -4.797222 | 45         | 14          | 0.8853837 | 0.04899490    | -0.6620802 | 0.06800663  | NA         |             |            |
| ## 579  | -4.759085 | 33         | 16          | 0.6867554 | 0.04897166    | -0.4891356 | 0.06787970  | NA         |             |            |
| ## 1209 | -4.749999 | 48         | 16          | 0.8035990 | 0.04902974    | -0.5286647 | 0.06819112  | NA         |             |            |
| ## 973  | -4.696554 | 43         | 17          | 0.8180629 | 0.04898258    | -0.6667891 | 0.06803156  | NA         |             |            |
| ## 931  | -4.631783 | 42         | 15          | 0.8351901 | 0.04897879    | -0.7008244 | 0.06793034  | NA         |             |            |
| ## 1063 | -4.623354 | 45         | 18          | 0.8130383 | 0.04899888    | -0.6083582 | 0.06808147  | NA         |             |            |
| ## 1017 | -4.572024 | 44         | 18          | 0.8097343 | 0.04898085    | -0.6281466 | 0.06804767  | NA         |             |            |
| ## 510  | -4.517666 | 31         | 18          | 0.5225618 | 0.04892357    | -0.3790670 | 0.06793934  | NA         |             |            |
| ## 1021 | -4.512650 | 44         | 14          | 0.8705341 | 0.04898466    | -0.6666277 | 0.06796981  | NA         |             |            |
| ## 480  | -4.511638 | 30         | 16          | 0.5494362 | 0.04893859    | -0.3708243 | 0.06810227  | NA         |             |            |
| ## 944  | -4.438145 | 42         | 2           | 1.0529507 | 0.04902264    | -1.0107469 | 0.06804540  | NA         |             |            |
| ## 976  | -4.436852 | 43         | 14          | 0.8659776 | 0.04897874    | -0.6932581 | 0.06793719  | NA         |             |            |
| ## 1210 | -4.414423 | 48         | 15          | 0.8045932 | 0.04903585    | -0.5304052 | 0.06816179  | NA         |             |            |
| ##      | ModelInt  | Function   | Furthest    | Closest   | Statistics    | Type       | K           | ModWeight  | sample.size | Randomised |
| ## 512  | 40.19533  | quad       | 50          | 0         | mean relative | 0          | 0.020872955 |            | 22          | no         |
| ## 513  | 40.18964  | quad       | 50          | 0         | mean relative | 0          | 0.017484832 |            | 22          | no         |
| ## 545  | 40.19438  | quad       | 50          | 0         | mean relative | 0          | 0.013531225 |            | 22          | no         |
| ## 514  | 40.18390  | quad       | 50          | 0         | mean relative | 0          | 0.013152155 |            | 22          | no         |
| ## 546  | 40.18927  | quad       | 50          | 0         | mean relative | 0          | 0.011907840 |            | 22          | no         |
| ## 974  | 40.18512  | quad       | 50          | 0         | mean relative | 0          | 0.010391942 |            | 22          | no         |
| ## 1019 | 40.17877  | quad       | 50          | 0         | mean relative | 0          | 0.010132185 |            | 22          | no         |
| ## 1065 | 40.17287  | quad       | 50          | 0         | mean relative | 0          | 0.010095982 |            | 22          | no         |
| ## 1066 | 40.17256  | quad       | 50          | 0         | mean relative | 0          | 0.008239309 |            | 22          | no         |
| ## 930  | 40.19599  | quad       | 50          | 0         | mean relative | 0          | 0.007987137 |            | 22          | no         |
| ## 511  | 40.20409  | quad       | 50          | 0         | mean relative | 0          | 0.007986572 |            | 22          | no         |
| ## 1018 | 40.18291  | quad       | 50          | 0         | mean relative | 0          | 0.007810675 |            | 22          | no         |
| ## 975  | 40.18407  | quad       | 50          | 0         | mean relative | 0          | 0.007750109 |            | 22          | no         |
| ## 1064 | 40.17707  | quad       | 50          | 0         | mean relative | 0          | 0.007748212 |            | 22          | no         |
| ## 1020 | 40.17783  | quad       | 50          | 0         | mean relative | 0          | 0.007586924 |            | 22          | no         |
| ## 547  | 40.18476  | quad       | 50          | 0         | mean relative | 0          | 0.007429531 |            | 22          | no         |
| ## 526  | 40.13406  | quad       | 50          | 0         | mean relative | 0          | 0.007283222 |            | 22          | no         |
| ## 1067 | 40.16965  | quad       | 50          | 0         | mean relative | 0          | 0.007214973 |            | 22          | no         |
| ## 579  | 40.18509  | quad       | 50          | 0         | mean relative | 0          | 0.007078698 |            | 22          | no         |



|    |      |          |      |    |   |               |   |             |    |    |
|----|------|----------|------|----|---|---------------|---|-------------|----|----|
| ## | 1209 | 40.16699 | quad | 50 | 0 | mean relative | 0 | 0.007046612 | 22 | no |
| ## | 973  | 40.18940 | quad | 50 | 0 | mean relative | 0 | 0.006860802 | 22 | no |
| ## | 931  | 40.19451 | quad | 50 | 0 | mean relative | 0 | 0.006642171 | 22 | no |
| ## | 1063 | 40.17907 | quad | 50 | 0 | mean relative | 0 | 0.006614238 | 22 | no |
| ## | 1017 | 40.18465 | quad | 50 | 0 | mean relative | 0 | 0.006446643 | 22 | no |
| ## | 510  | 40.21307 | quad | 50 | 0 | mean relative | 0 | 0.006273789 | 22 | no |
| ## | 1021 | 40.17428 | quad | 50 | 0 | mean relative | 0 | 0.006258073 | 22 | no |
| ## | 480  | 40.19762 | quad | 50 | 0 | mean relative | 0 | 0.006254908 | 22 | no |
| ## | 944  | 40.16213 | quad | 50 | 0 | mean relative | 0 | 0.006029234 | 22 | no |
| ## | 976  | 40.18070 | quad | 50 | 0 | mean relative | 0 | 0.006025337 | 22 | no |
| ## | 1210 | 40.16909 | quad | 50 | 0 | mean relative | 0 | 0.005958144 | 22 | no |

The best windows (deltaAICc difference from the best model < 2) for the linear+quadratic models sorted by deltaAICc. All models with the lowest AICc present very comparable windows:

```
sternum_50_bestmod <- subset(
  sternum_50_sw[[n_bestmod_sternum_50]]$Dataset,
  deltaAICc < sternum_50_sw[[n_bestmod_sternum_50]]$Dataset$deltaAICc[1] + 2
)
sternum_50_bestmod
```

| ## | deltaAICc | WindowOpen | WindowClose | ModelBeta | Std.Error  | ModelBetaQ    | Std.ErrorQ | ModelBetaC  |             |            |
|----|-----------|------------|-------------|-----------|------------|---------------|------------|-------------|-------------|------------|
| ## | 512       | -6.921814  | 31          | 16        | 0.6439868  | 0.04890045    | -0.4618389 | 0.06793423  | NA          |            |
| ## | 513       | -6.567573  | 31          | 15        | 0.6923178  | 0.04888465    | -0.4919496 | 0.06791674  | NA          |            |
| ## | 545       | -6.054905  | 32          | 16        | 0.6681248  | 0.04894310    | -0.4998184 | 0.06789905  | NA          |            |
| ## | 514       | -5.998077  | 31          | 14        | 0.7277946  | 0.04889078    | -0.5134053 | 0.06788579  | NA          |            |
| ## | 546       | -5.799299  | 32          | 15        | 0.7153519  | 0.04891801    | -0.5325067 | 0.06787628  | NA          |            |
| ## | 974       | -5.526967  | 43          | 16        | 0.8627472  | 0.04896451    | -0.7063225 | 0.06795367  | NA          |            |
| ## | 1019      | -5.476339  | 44          | 16        | 0.8637459  | 0.04896773    | -0.6758509 | 0.06798146  | NA          |            |
| ## | 1065      | -5.469180  | 45          | 16        | 0.8657824  | 0.04898187    | -0.6529619 | 0.06801712  | NA          |            |
| ## | 1066      | -5.062738  | 45          | 15        | 0.8729279  | 0.04899598    | -0.6545456 | 0.06799652  | NA          |            |
| ## | 930       | -5.000570  | 42          | 16        | 0.8194125  | 0.04897776    | -0.6897538 | 0.06795795  | NA          |            |
| ## | 511       | -5.000428  | 31          | 17        | 0.5647773  | 0.04895028    | -0.4018979 | 0.06797507  | NA          |            |
| ## | 1018      | -4.955888  | 44          | 17        | 0.8356887  | 0.04897945    | -0.6573560 | 0.06805801  | NA          |            |
| ## | 975       | -4.940319  | 43          | 15        | 0.8651537  | 0.04897529    | -0.7012805 | 0.06793445  | NA          |            |
| ## | 1064      | -4.939830  | 45          | 17        | 0.8360772  | 0.04899397    | -0.6333999 | 0.06809447  | NA          |            |
| ## | ModelInt  | Function   | Furthest    | Closest   | Statistics | Type          | K          | ModWeight   | sample.size | Randomised |
| ## | 512       | 40.19533   | quad        | 50        | 0          | mean relative | 0          | 0.020872955 | 22          | no         |
| ## | 513       | 40.18964   | quad        | 50        | 0          | mean relative | 0          | 0.017484832 | 22          | no         |
| ## | 545       | 40.19438   | quad        | 50        | 0          | mean relative | 0          | 0.013531225 | 22          | no         |
| ## | 514       | 40.18390   | quad        | 50        | 0          | mean relative | 0          | 0.013152155 | 22          | no         |
| ## | 546       | 40.18927   | quad        | 50        | 0          | mean relative | 0          | 0.011907840 | 22          | no         |
| ## | 974       | 40.18512   | quad        | 50        | 0          | mean relative | 0          | 0.010391942 | 22          | no         |
| ## | 1019      | 40.17877   | quad        | 50        | 0          | mean relative | 0          | 0.010132185 | 22          | no         |
| ## | 1065      | 40.17287   | quad        | 50        | 0          | mean relative | 0          | 0.010095982 | 22          | no         |
| ## | 1066      | 40.17256   | quad        | 50        | 0          | mean relative | 0          | 0.008239309 | 22          | no         |
| ## | 930       | 40.19599   | quad        | 50        | 0          | mean relative | 0          | 0.007987137 | 22          | no         |
| ## | 511       | 40.20409   | quad        | 50        | 0          | mean relative | 0          | 0.007986572 | 22          | no         |
| ## | 1018      | 40.18291   | quad        | 50        | 0          | mean relative | 0          | 0.007810675 | 22          | no         |
| ## | 975       | 40.18407   | quad        | 50        | 0          | mean relative | 0          | 0.007750109 | 22          | no         |
| ## | 1064      | 40.17707   | quad        | 50        | 0          | mean relative | 0          | 0.007748212 | 22          | no         |

**Windows plot** It's possible to extract the time windows of all the best supported models (i.e. multi-model inference). This panel shows the opening and closing points of the time windows that were best supported

by the data, here those models that made up 95% model confidence set.

```
plotwin(sternum_50_sw[[n_bestmod_sternum_50]]$Dataset)
```

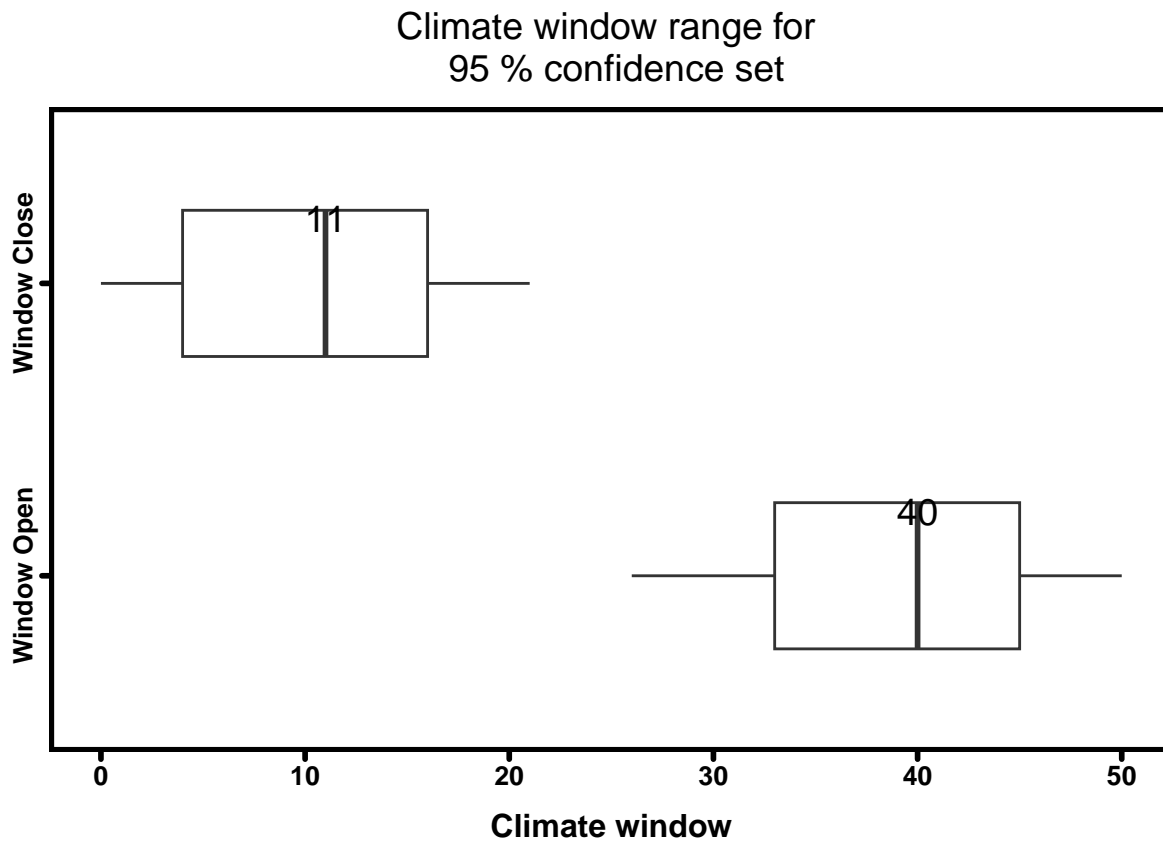

**Delta plot** The variation in deltaAICc between time windows can be better investigated using the following plot:

```
plotdelta(  
  dataset =  
    sternum_50_sw[[n_bestmod_sternum_50]]$Dataset, arrow = TRUE  
)
```

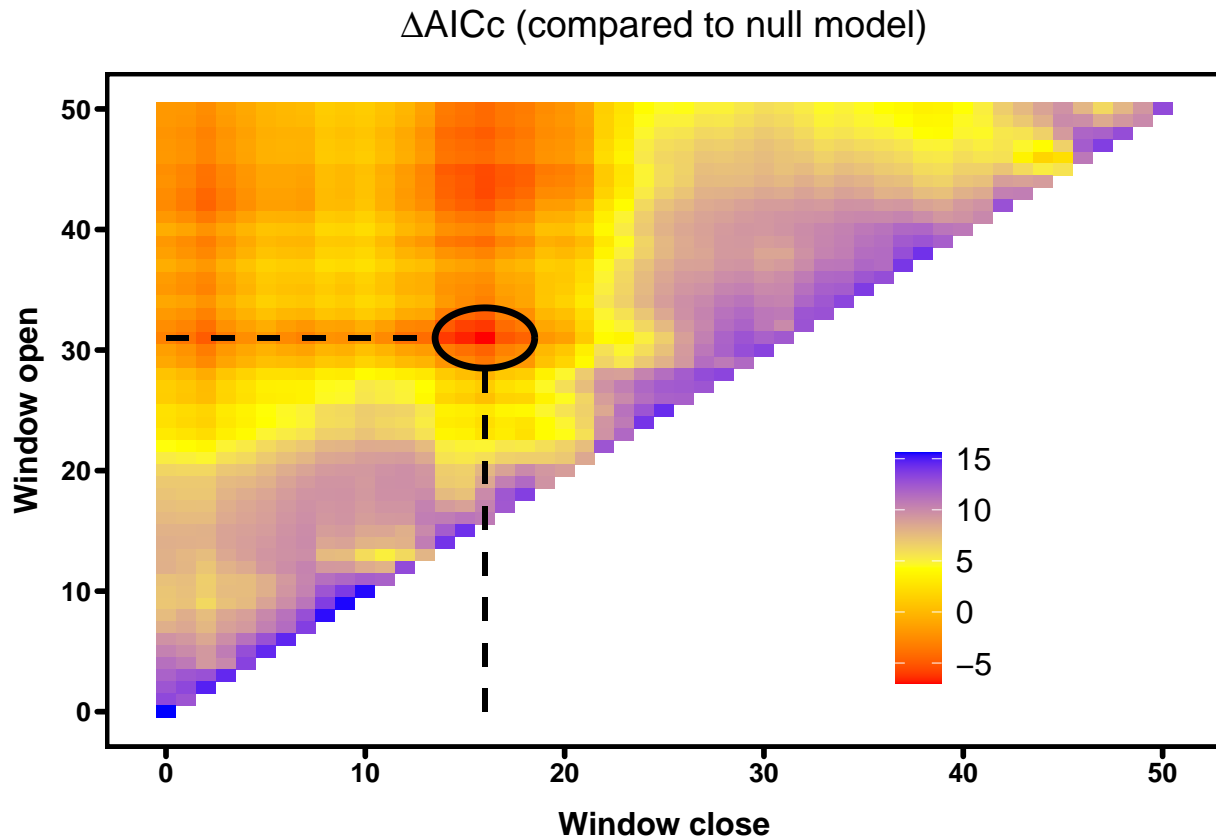

Warmer areas shows values with the lowest deltaAICc (i.e. “best models”). As explained by van de Pol et al., 2016, these deltaAICc landscapes of the different time windows shows multiple peaks (red areas) instead of a clear single peak. This can indicate the presence of multiple (e.g. possibly both long- and short-lag) weather signals within the same weather variable, but it can also occur due to collinearity or chance.

The evidence for multiple signals can be therefore investigated by adding the best supported of the weather windows to the baseline model, and re-fitting all the different time windows again: this tests whether there is still strong model support for the second best (e.g. short-lag) weather window once the other best supported (e.g. long-lag) weather window has been accounted for in the baseline model (here in the Step 2).

**Beta plot** This panel shows the model support (deltaAICc) for all fitted time windows tried, shown for each combination of Window open (y-axis) and Window close (x-axis). Models with the lowest deltaAICc (red) are the best supported (colours show the deltaAICc levels compared to the null model, see legend). Strongly supported windows will often be grouped together.

```
plotbetas(sternum_50_sw[[n_bestmod_sternum_50]]$Dataset, arrow = TRUE)
```

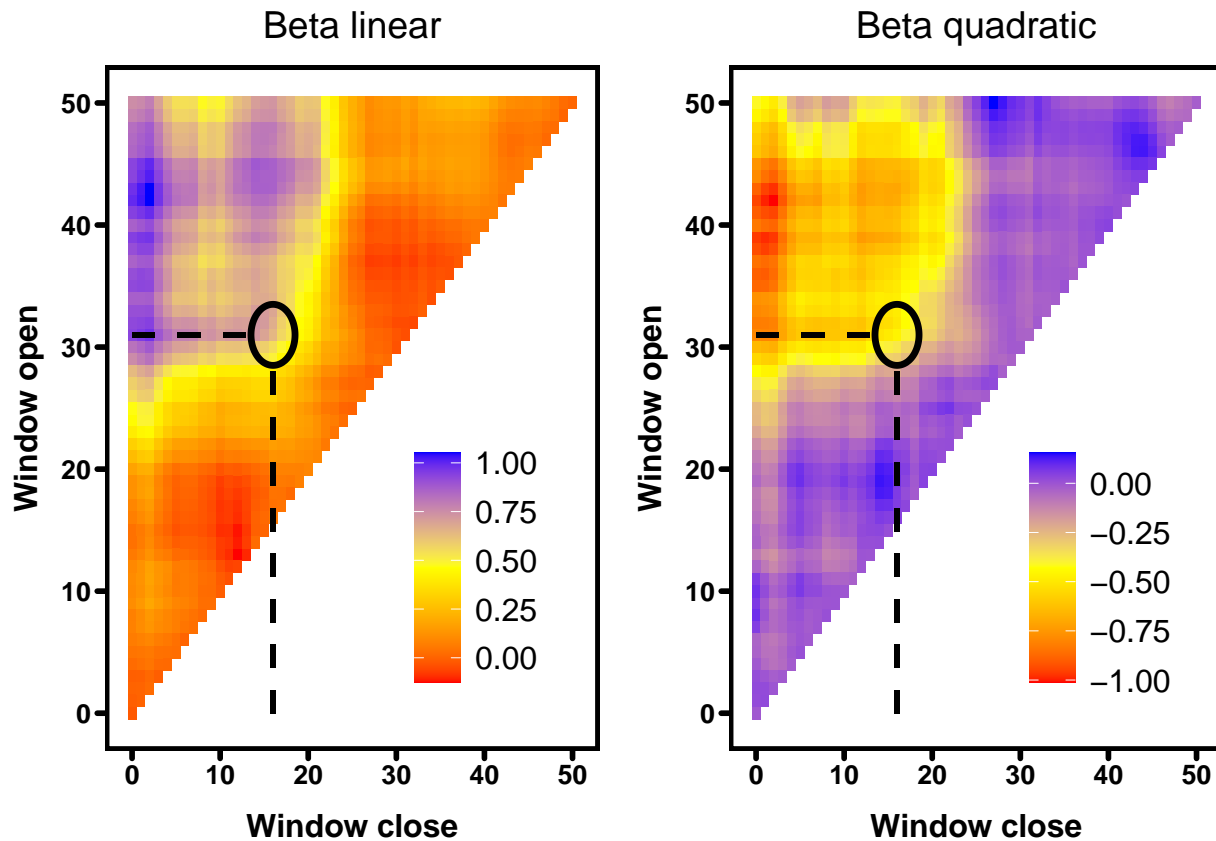

**Autocollinearity** Correlation between the mean temperature during the best supported time window and the mean temperature over all other time windows.

```
autocoll <- autowin(
  reference = sternum_50_sw[[n_bestmod_sternum_50]],
  baseline = sternum_50_basemod,
  xvar = list(
    tr_pcl = data_clim_sub$tr_comp_1
  ),
  type = "relative",
  range = c(50, 0),
  stat = "mean",
  cdate = data_clim_sub$date,
  bdate = data_am_nestlings_sternum_50$date_50days,
  func = "quad",
  # cmissing = FALSE,
  cinterval = "day"
)

save(autocoll, file = "output/sternum_50_autocoll.rda")
```

```
load(file = "output/sternum_50_autocoll.rda")
plotcor(autocoll, type = "A", arrow = TRUE)
```

## Correlation between single window and all other windows

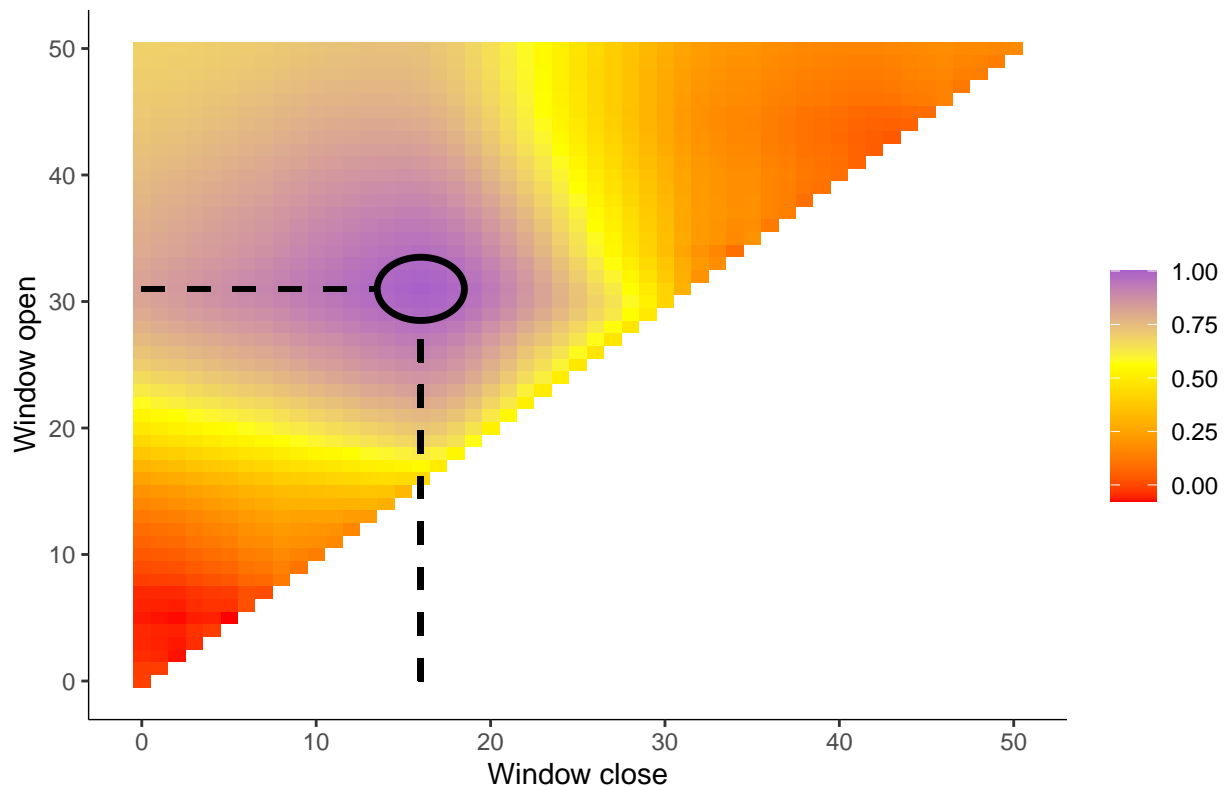

**Randwin** Using `randwin` to randomize the identity of the nestling, we are able to check if the window that was found before is actually important, or the relationship was just random.

```
# Performing randomization to identify  
# likelihood of of signals occurring by chance
```

```
sternum_50_rand1000 <- randwin(  
  repeats = 1000,  
  baseline = sternum_50_basemod,  
  xvar = list(tr_pcl = data_clim_sub$str_comp_1),  
  stat = c("mean"),  
  func = c("quad"),  
  type = "relative", # relative to the individual  
  range = c(50, 0),  
  cinterval = "day",  
  cdate = data_clim_sub$date,  
  bdate = data_am_nestlings_sternum_50$date_50days,  
  cmissing = FALSE  
)  
save(sternum_50_rand1000, file = "output/sternum_50_rand1000.rda")
```

```
load("output/sternum_50_rand1000.rda")
```

```
climwin::pvalue(  
  datasetrand = sternum_50_rand1000[[1]],  
  dataset = sternum_50_sw[[n_bestmod_sternum_50]]$Dataset,
```

```
metric = "AIC",
sample.size = sternum_50_sw[[n_bestmod_sternum_50]]$Dataset$sample.size[1]
)
```

```
## [1] 0.012
```

This panel shows a histogram of all  $\Delta AICc$  values from all models run on the randomized (in grey) and the  $\Delta AICc$  of the best model fitted on the observed data (dashed line). The best climate window in the randomized data is by definition a false positive, as the randomization procedure removes any climate signal from the data. The percentage of randomizations that generates a  $\Delta AICc$  value that is at least as low as the  $\Delta AICc$  value of the best model fitted to the observed data (P value above) is a measure of how likely it is that one obtained the observed  $\Delta AICc$  by chance and thus whether the signal is likely to be real or not. In our case we can say that the candidate signal is very unlikely to be a false positive:  $P < 0.05$ .

```
climwin::plothist(
  datasetrand = sternum_50_rand1000[[1]],
  dataset = sternum_50_sw[[n_bestmod_sternum_50]]$Dataset
)
```

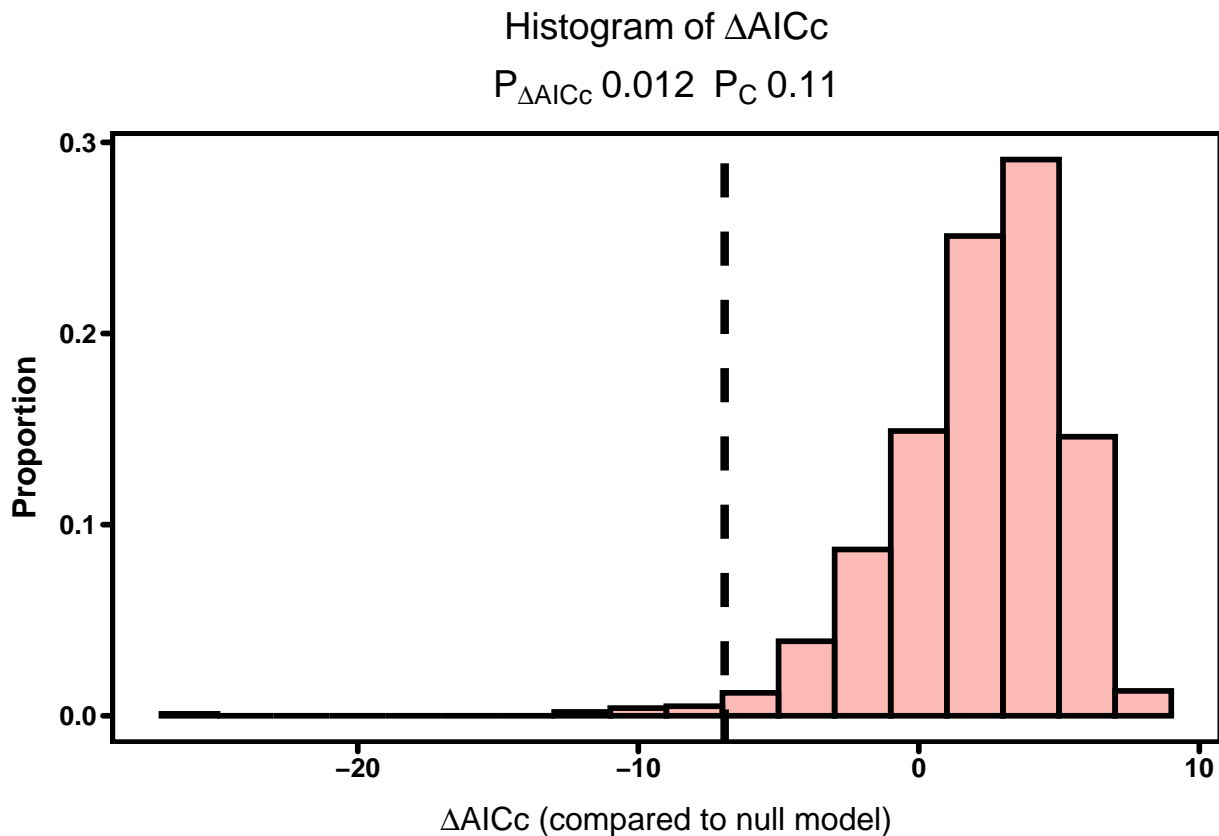

**Extracting the best window** The best window was obtained by averaging the opening and closing dates for all the best models ( $\Delta AICc < 2$ ). The best window opened 38.5 (mean; SD: 6.5) and closed 15.79 (mean; SD: 0.89) days before the 50 days measurement. Which corresponds to the age of the nestling of 12 and 34 days old.

```
sternum_50_bestsw <- singlewin(
  baseline = sternum_50_basemod,
  xvar = list(
    tr_pc1 = data_clim_sub$tr_comp_1
  ),
  stat = c("mean"),
  func = c("quad"),
  type = "relative",
  range = c(
    round(mean(sternum_50_bestmod$WindowOpen), 0),
    round(mean(sternum_50_bestmod$WindowClose), 0)
  ),
  cinterval = "day",
  cdate = data_clim_sub$date,
  bdate = data_am_nestlings_sternum_50$date_50days
)
```

```
## fixed-effect model matrix is rank deficient so dropping 2 columns / coefficients
```

```
# adding the climatic variable to the sternum_50 dataset
data_am_nestlings_sternum_50$signal_for_sternum_50 <-
  sternum_50_bestsw$BestModelData$climate
```

**Body mass at 50 days** The linear+quadratic term for the mean temperature better explains the variation in the data (deltaAICc has the lowest value), sorted by deltaAICc such that the best supported model is on top.

```
mass_50_mod_combos <- (mass_50_sw$combos)
mass_50_mod_combos[order(mass_50_mod_combos$DeltaAICc), ]
```

```
##  response  climate    type stat func DeltaAICc WindowOpen WindowClose
## 6  mass_50 temp_mean relative mean quad   -64.27         2         0
## 5  mass_50   tr_pc1 relative mean quad   -56.32         4         0
## 3  mass_50 rain_mean relative mean  lin   -51.49         9         0
## 7  mass_50 rain_mean relative mean quad   -46.89         9         0
## 8  mass_50 wind_mean relative mean quad   -40.15        45         8
## 1  mass_50   tr_pc1 relative mean  lin   -39.94         4         0
## 2  mass_50 temp_mean relative mean  lin   -35.18         1         0
## 4  mass_50 wind_mean relative mean  lin   -18.87        45        40
```

```
n_bestmod_mass_50 <- as.numeric(rownames(
  mass_50_mod_combos[order(mass_50_mod_combos$DeltaAICc), ]
))[1]
```

**The best quadratic models** The 30 best windows for the linear+quadratic models sorted by deltaAICc. To investigate any other tested hypothesis we can simply replace the number on the left or in the double square brackets with the corresponding list number.

```
head(mass_50_sw[[n_bestmod_mass_50]]$Dataset, 50)
```

| ##      | deltaAICc  | WindowOpen | WindowClose | ModelBeta  | Std.Error | ModelBetaQ   | Std.ErrorQ | ModelBetaC |
|---------|------------|------------|-------------|------------|-----------|--------------|------------|------------|
| ## 6    | -64.265745 | 2          | 0           | 8.0014807  | 0.3184047 | -0.192959345 | 0.4563156  | NA         |
| ## 3    | -57.417441 | 1          | 0           | 5.9146946  | 0.3188554 | -0.139728688 | 0.4574132  | NA         |
| ## 2    | -48.801874 | 1          | 1           | 5.2562216  | 0.3202113 | -0.124370013 | 0.4592101  | NA         |
| ## 5    | -45.503437 | 2          | 1           | 6.5996671  | 0.3208174 | -0.159444724 | 0.4595184  | NA         |
| ## 1    | -44.871127 | 0          | 0           | 4.5530382  | 0.3198698 | -0.105871770 | 0.4591271  | NA         |
| ## 10   | -44.739372 | 3          | 0           | 8.0230803  | 0.3208091 | -0.193644153 | 0.4599293  | NA         |
| ## 121  | -35.271271 | 15         | 15          | -5.7236610 | 0.3219224 | 0.145600952  | 0.4689043  | NA         |
| ## 122  | -28.813650 | 15         | 14          | -5.9096382 | 0.3225436 | 0.150690114  | 0.4691278  | NA         |
| ## 15   | -24.884130 | 4          | 0           | 6.7699591  | 0.3233282 | -0.161733539 | 0.4642305  | NA         |
| ## 139  | -24.053360 | 16         | 14          | -5.9596517 | 0.3232328 | 0.150508352  | 0.4713939  | NA         |
| ## 9    | -23.215307 | 3          | 1           | 5.9924116  | 0.3234409 | -0.144702742 | 0.4639332  | NA         |
| ## 138  | -18.398435 | 16         | 15          | -4.6501193 | 0.3239311 | 0.116241153  | 0.4718085  | NA         |
| ## 4    | -16.345357 | 2          | 2           | 4.2267672  | 0.3241902 | -0.101840063 | 0.4655616  | NA         |
| ## 157  | -15.395147 | 17         | 14          | -5.4872152 | 0.3243518 | 0.138185591  | 0.4732694  | NA         |
| ## 140  | -15.375912 | 16         | 13          | -5.6176560 | 0.3240217 | 0.140428808  | 0.4723567  | NA         |
| ## 1279 | -12.905738 | 50         | 47          | 1.3678827  | 0.3240612 | -0.049829258 | 0.4681603  | NA         |
| ## 123  | -12.371086 | 15         | 13          | -4.9925901 | 0.3242315 | 0.125637616  | 0.4710788  | NA         |
| ## 1278 | -12.213769 | 50         | 48          | 1.4118977  | 0.3240720 | -0.050341022 | 0.4678141  | NA         |
| ## 106  | -12.203046 | 14         | 14          | -4.0960462 | 0.3242509 | 0.104723174  | 0.4697100  | NA         |
| ## 1226 | -12.191126 | 49         | 49          | 1.4532133  | 0.3240324 | -0.050132671 | 0.4676623  | NA         |
| ## 1280 | -12.124291 | 50         | 46          | 1.2680288  | 0.3243788 | -0.047418607 | 0.4687205  | NA         |
| ## 21   | -12.027305 | 5          | 0           | 5.7528748  | 0.3249174 | -0.137258129 | 0.4679125  | NA         |
| ## 1277 | -11.966925 | 50         | 49          | 0.9682711  | 0.3241553 | -0.037986143 | 0.4677597  | NA         |
| ## 158  | -11.823227 | 17         | 13          | -5.5029344 | 0.3246075 | 0.137192885  | 0.4738899  | NA         |
| ## 1281 | -11.015150 | 50         | 45          | 0.8550540  | 0.3247216 | -0.036783970 | 0.4691790  | NA         |
| ## 176  | -9.953076  | 18         | 14          | -5.3554141 | 0.3250558 | 0.135516343  | 0.4741460  | NA         |
| ## 177  | -9.322745  | 18         | 13          | -5.6945928 | 0.3250141 | 0.142770026  | 0.4746506  | NA         |
| ## 1227 | -9.007762  | 49         | 48          | 1.5543038  | 0.3244950 | -0.052383371 | 0.4684170  | NA         |
| ## 1276 | -8.385601  | 50         | 50          | 0.4477120  | 0.3247501 | -0.022686123 | 0.4684220  | NA         |
| ## 156  | -8.291613  | 17         | 15          | -3.9568110 | 0.3251558 | 0.098331201  | 0.4731107  | NA         |
| ## 1228 | -8.140613  | 49         | 47          | 1.2620144  | 0.3246275 | -0.044991248 | 0.4690207  | NA         |
| ## 1282 | -7.075916  | 50         | 44          | 0.2410714  | 0.3254830 | -0.019691003 | 0.4700414  | NA         |
| ## 1229 | -7.037589  | 49         | 46          | 1.0705981  | 0.3249336 | -0.040124275 | 0.4696200  | NA         |
| ## 14   | -6.862556  | 4          | 1           | 4.3699728  | 0.3255317 | -0.103658302 | 0.4682194  | NA         |
| ## 1230 | -6.046203  | 49         | 45          | 0.5746021  | 0.3252348 | -0.027306799 | 0.4700261  | NA         |
| ## 1284 | -5.702757  | 50         | 42          | -0.9928712 | 0.3262797 | 0.013024044  | 0.4704723  | NA         |
| ## 1283 | -5.603272  | 50         | 43          | -0.4015480 | 0.3259940 | -0.002348656 | 0.4703643  | NA         |
| ## 28   | -5.570170  | 6          | 0           | 5.1919576  | 0.3257501 | -0.124269637 | 0.4703250  | NA         |
| ## 1285 | -5.550433  | 50         | 41          | -1.0187081 | 0.3264131 | 0.013189168  | 0.4706785  | NA         |
| ## 1288 | -5.370280  | 50         | 38          | -4.3638939 | 0.3267350 | 0.102250124  | 0.4707039  | NA         |
| ## 141  | -5.349017  | 16         | 12          | -4.5146059 | 0.3252159 | 0.111040645  | 0.4732118  | NA         |
| ## 178  | -5.335599  | 18         | 12          | -5.2555336 | 0.3254513 | 0.130259952  | 0.4748469  | NA         |
| ## 159  | -5.333387  | 17         | 12          | -4.6999299 | 0.3253386 | 0.115365050  | 0.4742245  | NA         |
| ## 1287 | -4.739701  | 50         | 39          | -3.3248530 | 0.3266830 | 0.074979745  | 0.4707444  | NA         |
| ## 197  | -4.672331  | 19         | 13          | -5.5028451 | 0.3256010 | 0.138793708  | 0.4753384  | NA         |
| ## 1291 | -4.380901  | 50         | 35          | -6.3747139 | 0.3268649 | 0.155041525  | 0.4717930  | NA         |
| ## 1286 | -4.371365  | 50         | 40          | -2.0213878 | 0.3266735 | 0.040255241  | 0.4707860  | NA         |
| ## 1138 | -4.186436  | 47         | 38          | -5.9523265 | 0.3268705 | 0.149630331  | 0.4704765  | NA         |
| ## 1290 | -4.043183  | 50         | 36          | -5.2365932 | 0.3269496 | 0.125004082  | 0.4714795  | NA         |
| ## 965  | -3.974394  | 43         | 25          | 13.3421156 | 0.3259410 | -0.339959105 | 0.4743405  | NA         |



| ##      | ModelInt   | Function | Furthest | Closest | Statistics    | Type K | ModWeight    | sample.size |
|---------|------------|----------|----------|---------|---------------|--------|--------------|-------------|
| ## 6    | 18.90363   | quad     | 50       | 0       | mean relative | 0      | 9.678487e-01 | 25          |
| ## 3    | 39.06261   | quad     | 50       | 0       | mean relative | 0      | 3.152951e-02 | 25          |
| ## 2    | 45.93467   | quad     | 50       | 0       | mean relative | 0      | 4.244931e-04 | 25          |
| ## 5    | 33.21668   | quad     | 50       | 0       | mean relative | 0      | 8.158757e-05 | 25          |
| ## 1    | 52.53170   | quad     | 50       | 0       | mean relative | 0      | 5.947297e-05 | 25          |
| ## 10   | 18.60605   | quad     | 50       | 0       | mean relative | 0      | 5.568130e-05 | 25          |
| ## 121  | 154.78937  | quad     | 50       | 0       | mean relative | 0      | 4.894829e-07 | 25          |
| ## 122  | 156.45590  | quad     | 50       | 0       | mean relative | 0      | 1.938576e-08 | 25          |
| ## 15   | 30.62282   | quad     | 50       | 0       | mean relative | 0      | 2.717680e-09 | 25          |
| ## 139  | 157.66145  | quad     | 50       | 0       | mean relative | 0      | 1.793903e-09 | 25          |
| ## 9    | 39.20231   | quad     | 50       | 0       | mean relative | 0      | 1.179827e-09 | 25          |
| ## 138  | 145.37933  | quad     | 50       | 0       | mean relative | 0      | 1.061323e-10 | 25          |
| ## 4    | 57.08835   | quad     | 50       | 0       | mean relative | 0      | 3.802134e-11 | 25          |
| ## 157  | 153.37041  | quad     | 50       | 0       | mean relative | 0      | 2.364243e-11 | 25          |
| ## 140  | 154.98822  | quad     | 50       | 0       | mean relative | 0      | 2.341613e-11 | 25          |
| ## 1279 | 91.67474   | quad     | 50       | 0       | mean relative | 0      | 6.809631e-12 | 25          |
| ## 123  | 148.43010  | quad     | 50       | 0       | mean relative | 0      | 5.212252e-12 | 25          |
| ## 1278 | 91.05801   | quad     | 50       | 0       | mean relative | 0      | 4.817976e-12 | 25          |
| ## 106  | 138.79694  | quad     | 50       | 0       | mean relative | 0      | 4.792212e-12 | 25          |
| ## 1226 | 90.34165   | quad     | 50       | 0       | mean relative | 0      | 4.763736e-12 | 25          |
| ## 1280 | 92.66743   | quad     | 50       | 0       | mean relative | 0      | 4.607173e-12 | 25          |
| ## 21   | 40.87098   | quad     | 50       | 0       | mean relative | 0      | 4.389089e-12 | 25          |
| ## 1277 | 94.90347   | quad     | 50       | 0       | mean relative | 0      | 4.258562e-12 | 25          |
| ## 158  | 154.11470  | quad     | 50       | 0       | mean relative | 0      | 3.963323e-12 | 25          |
| ## 1281 | 96.53364   | quad     | 50       | 0       | mean relative | 0      | 2.645987e-12 | 25          |
| ## 176  | 151.94715  | quad     | 50       | 0       | mean relative | 0      | 1.555827e-12 | 25          |
| ## 177  | 155.80137  | quad     | 50       | 0       | mean relative | 0      | 1.135237e-12 | 25          |
| ## 1227 | 89.25976   | quad     | 50       | 0       | mean relative | 0      | 9.698152e-13 | 25          |
| ## 1276 | 99.11526   | quad     | 50       | 0       | mean relative | 0      | 7.105399e-13 | 25          |
| ## 156  | 138.91248  | quad     | 50       | 0       | mean relative | 0      | 6.779210e-13 | 25          |
| ## 1228 | 92.04857   | quad     | 50       | 0       | mean relative | 0      | 6.286225e-13 | 25          |
| ## 1282 | 101.88165  | quad     | 50       | 0       | mean relative | 0      | 3.691425e-13 | 25          |
| ## 1229 | 93.86256   | quad     | 50       | 0       | mean relative | 0      | 3.621357e-13 | 25          |
| ## 14   | 54.90272   | quad     | 50       | 0       | mean relative | 0      | 3.317902e-13 | 25          |
| ## 1230 | 98.48596   | quad     | 50       | 0       | mean relative | 0      | 2.205944e-13 | 25          |
| ## 1284 | 113.25103  | quad     | 50       | 0       | mean relative | 0      | 1.857874e-13 | 25          |
| ## 1283 | 107.68886  | quad     | 50       | 0       | mean relative | 0      | 1.767719e-13 | 25          |
| ## 28   | 46.68107   | quad     | 50       | 0       | mean relative | 0      | 1.738703e-13 | 25          |
| ## 1285 | 113.69355  | quad     | 50       | 0       | mean relative | 0      | 1.721628e-13 | 25          |
| ## 1288 | 144.70749  | quad     | 50       | 0       | mean relative | 0      | 1.573329e-13 | 25          |
| ## 141  | 144.93189  | quad     | 50       | 0       | mean relative | 0      | 1.556691e-13 | 25          |
| ## 178  | 152.11223  | quad     | 50       | 0       | mean relative | 0      | 1.546283e-13 | 25          |
| ## 159  | 146.94491  | quad     | 50       | 0       | mean relative | 0      | 1.544573e-13 | 25          |
| ## 1287 | 134.91394  | quad     | 50       | 0       | mean relative | 0      | 1.147866e-13 | 25          |
| ## 197  | 153.69299  | quad     | 50       | 0       | mean relative | 0      | 1.109844e-13 | 25          |
| ## 1291 | 163.79464  | quad     | 50       | 0       | mean relative | 0      | 9.593540e-14 | 25          |
| ## 1286 | 122.83998  | quad     | 50       | 0       | mean relative | 0      | 9.547908e-14 | 25          |
| ## 1138 | 157.76346  | quad     | 50       | 0       | mean relative | 0      | 8.704648e-14 | 25          |
| ## 1290 | 153.07979  | quad     | 50       | 0       | mean relative | 0      | 8.102974e-14 | 25          |
| ## 965  | -29.87635  | quad     | 50       | 0       | mean relative | 0      | 7.829012e-14 | 25          |
| ##      | Randomised |          |          |         |               |        |              |             |
| ## 6    |            | no       |          |         |               |        |              |             |
| ## 3    |            | no       |          |         |               |        |              |             |

|         |    |
|---------|----|
| ## 2    | no |
| ## 5    | no |
| ## 1    | no |
| ## 10   | no |
| ## 121  | no |
| ## 122  | no |
| ## 15   | no |
| ## 139  | no |
| ## 9    | no |
| ## 138  | no |
| ## 4    | no |
| ## 157  | no |
| ## 140  | no |
| ## 1279 | no |
| ## 123  | no |
| ## 1278 | no |
| ## 106  | no |
| ## 1226 | no |
| ## 1280 | no |
| ## 21   | no |
| ## 1277 | no |
| ## 158  | no |
| ## 1281 | no |
| ## 176  | no |
| ## 177  | no |
| ## 1227 | no |
| ## 1276 | no |
| ## 156  | no |
| ## 1228 | no |
| ## 1282 | no |
| ## 1229 | no |
| ## 14   | no |
| ## 1230 | no |
| ## 1284 | no |
| ## 1283 | no |
| ## 28   | no |
| ## 1285 | no |
| ## 1288 | no |
| ## 141  | no |
| ## 178  | no |
| ## 159  | no |
| ## 1287 | no |
| ## 197  | no |
| ## 1291 | no |
| ## 1286 | no |
| ## 1138 | no |
| ## 1290 | no |
| ## 965  | no |

The best windows (deltaAICc difference from the best model  $< 2$ ) for the linear+quadratic models sorted by deltaAICc. There is only one best window:

```

mass_50_bestmod <- subset(
  mass_50_sw[[n_bestmod_mass_50]]$Dataset,
  deltaAICc < mass_50_sw[[n_bestmod_mass_50]]$Dataset$deltaAICc[1] + 2
)

mass_50_bestmod

```

```

##   deltaAICc WindowOpen WindowClose ModelBeta Std.Error ModelBetaQ Std.ErrorQ ModelBetaC ModelInt
## 6 -64.26574         2         0 8.001481 0.3184047 -0.1929593 0.4563156          NA 18.90363
##   Function Furthest Closest Statistics      Type K ModWeight sample.size Randomised
## 6    quad      50      0    mean relative 0 0.9678487          25          no

```

As it can be seen here, all the other models have a deltaAICc difference from the best model much larger than 2.

```
head(mass_50_sw[[n_bestmod_mass_50]]$Dataset)
```

```

##   deltaAICc WindowOpen WindowClose ModelBeta Std.Error ModelBetaQ Std.ErrorQ ModelBetaC
## 6 -64.26574         2         0 8.001481 0.3184047 -0.1929593 0.4563156          NA
## 3 -57.41744         1         0 5.914695 0.3188554 -0.1397287 0.4574132          NA
## 2 -48.80187         1         1 5.256222 0.3202113 -0.1243700 0.4592101          NA
## 5 -45.50344         2         1 6.599667 0.3208174 -0.1594447 0.4595184          NA
## 1 -44.87113         0         0 4.553038 0.3198698 -0.1058718 0.4591271          NA
## 10 -44.73937        3         0 8.023080 0.3208091 -0.1936442 0.4599293          NA
##   ModelInt Function Furthest Closest Statistics      Type K   ModWeight sample.size Randomised
## 6 18.90363    quad      50      0    mean relative 0 9.678487e-01          25          no
## 3 39.06261    quad      50      0    mean relative 0 3.152951e-02          25          no
## 2 45.93467    quad      50      0    mean relative 0 4.244931e-04          25          no
## 5 33.21668    quad      50      0    mean relative 0 8.158757e-05          25          no
## 1 52.53170    quad      50      0    mean relative 0 5.947297e-05          25          no
## 10 18.60605    quad      50      0    mean relative 0 5.568130e-05          25          no

```

**Windows plot** It's possible to extract the time windows of all the best supported models (i.e. multi-model inference). This panel shows the opening and closing points of the time windows that were best supported by the data, here those models that made up 95% model confidence set.

```
plotwin(mass_50_sw[[n_bestmod_mass_50]]$Dataset)
```

```

## Warning in plotwin(mass_50_sw[[n_bestmod_mass_50]]$Dataset): Top window has a weight greater
## than 0.95. Plotting single best window only.

```

### Climate window range for 95 % confidence set

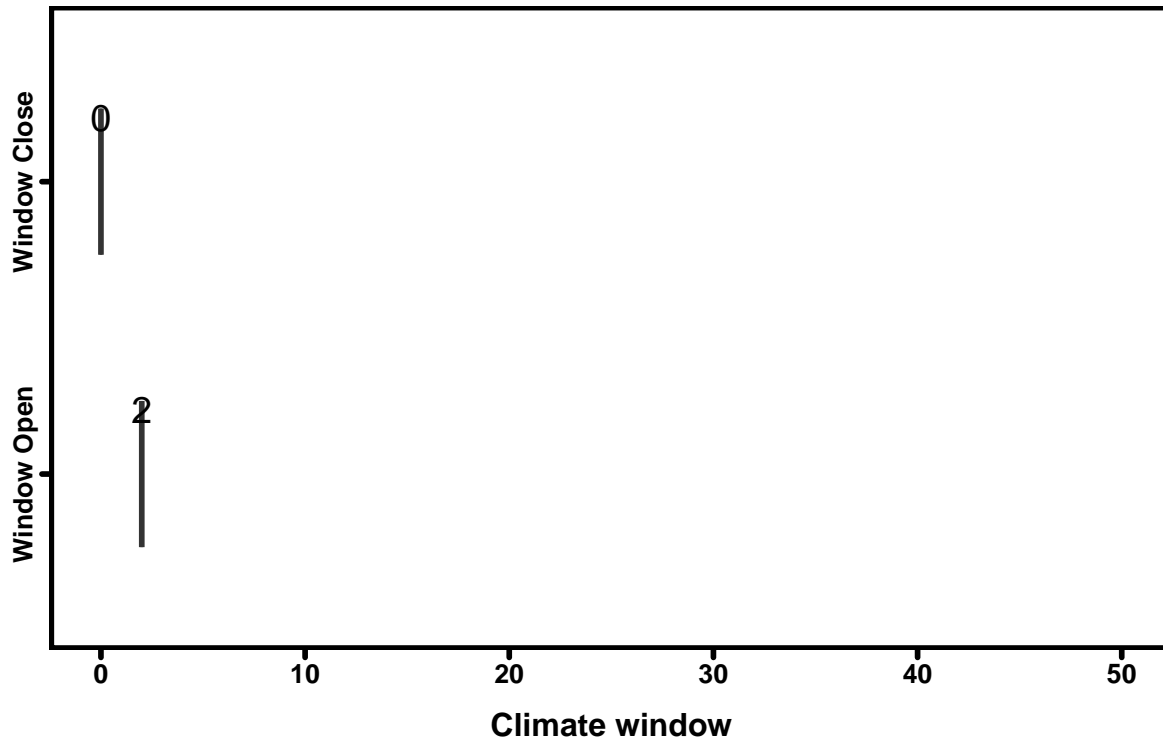

**Delta plot** The variation in deltaAICc between time windows can be better investigated using the following plot:

```
plotdelta(  
  dataset =  
    mass_50_sw[[n_bestmod_mass_50]]$Dataset, arrow = TRUE  
)
```

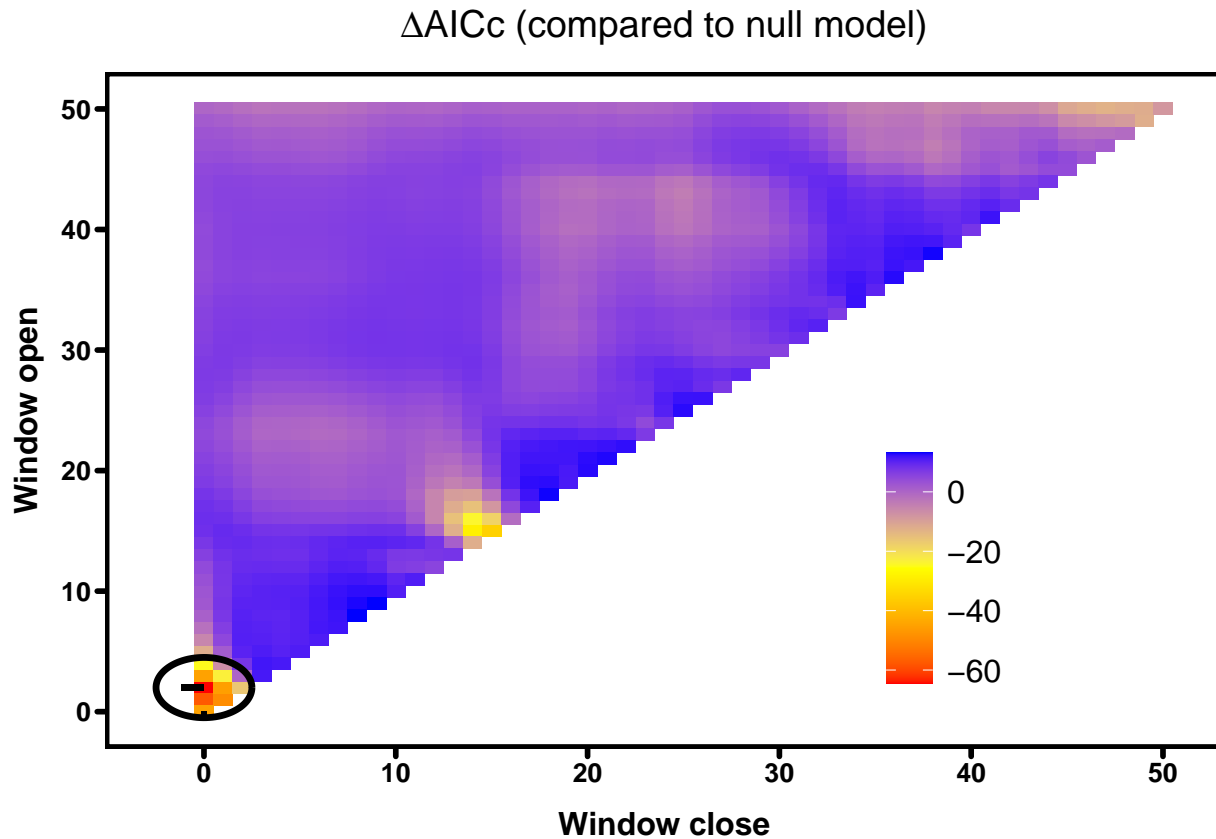

Warmer areas shows values with the lowest deltaAICc (i.e. “best models”). As explained by van de Pol et al., 2016, these deltaAICc landscapes of the different time windows shows multiple peaks (red areas) instead of a clear single peak. This can indicate the presence of multiple (e.g. possibly both long- and short-lag) weather signals within the same weather variable, but it can also occur due to collinearity or chance.

The evidence for multiple signals can be therefore investigated by adding the best supported of the weather windows to the baseline model, and re-fitting all the different time windows again: this tests whether there is still strong model support for the second best (e.g. short-lag) weather window once the other best supported (e.g. long-lag) weather window has been accounted for in the baseline model (here in the Step 2).

**Beta plot** This panel shows the model support (deltaAICc) for all fitted time windows tried, shown for each combination of Window open (y-axis) and Window close (x-axis). Models with the lowest deltaAICc (red) are the best supported (colours show the deltaAICc levels compared to the null model, see legend). Strongly supported windows will often be grouped together.

```
plotbetas(mass_50_sw[[n_bestmod_mass_50]]$Dataset, arrow = TRUE)
```

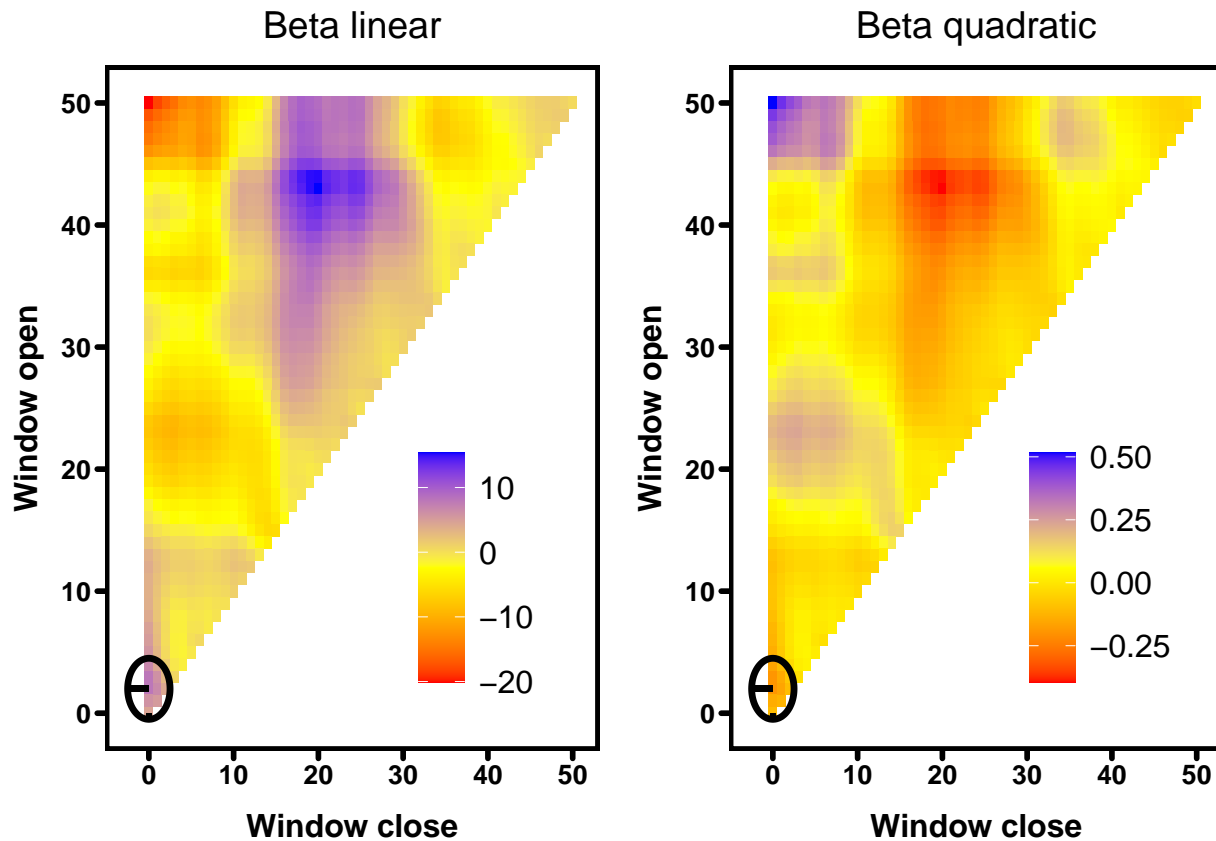

**Autocollinearity** Correlation between the mean temperature during the best supported time window and the mean temperature over all other time windows.

```
autocoll <- autowin(
  reference = mass_50_sw[[n_bestmod_mass_50]],
  baseline = mass_50_basemod,
  xvar = list(
    tr_pcl = data_clim_sub$tr_comp_1
  ),
  type = "relative",
  range = c(50, 0),
  stat = "mean",
  cdate = data_clim_sub$date,
  bdate = data_am_nestlings_mass_50$date_50days,
  func = "quad",
  # cmissing = FALSE,
  cinterval = "day"
)

save(autocoll, file = "output/mass_50_autocoll.rda")
```

```
load(file = "output/mass_50_autocoll.rda")
plotcor(autocoll, type = "A", arrow = TRUE)
```

## Correlation between single window and all other windows

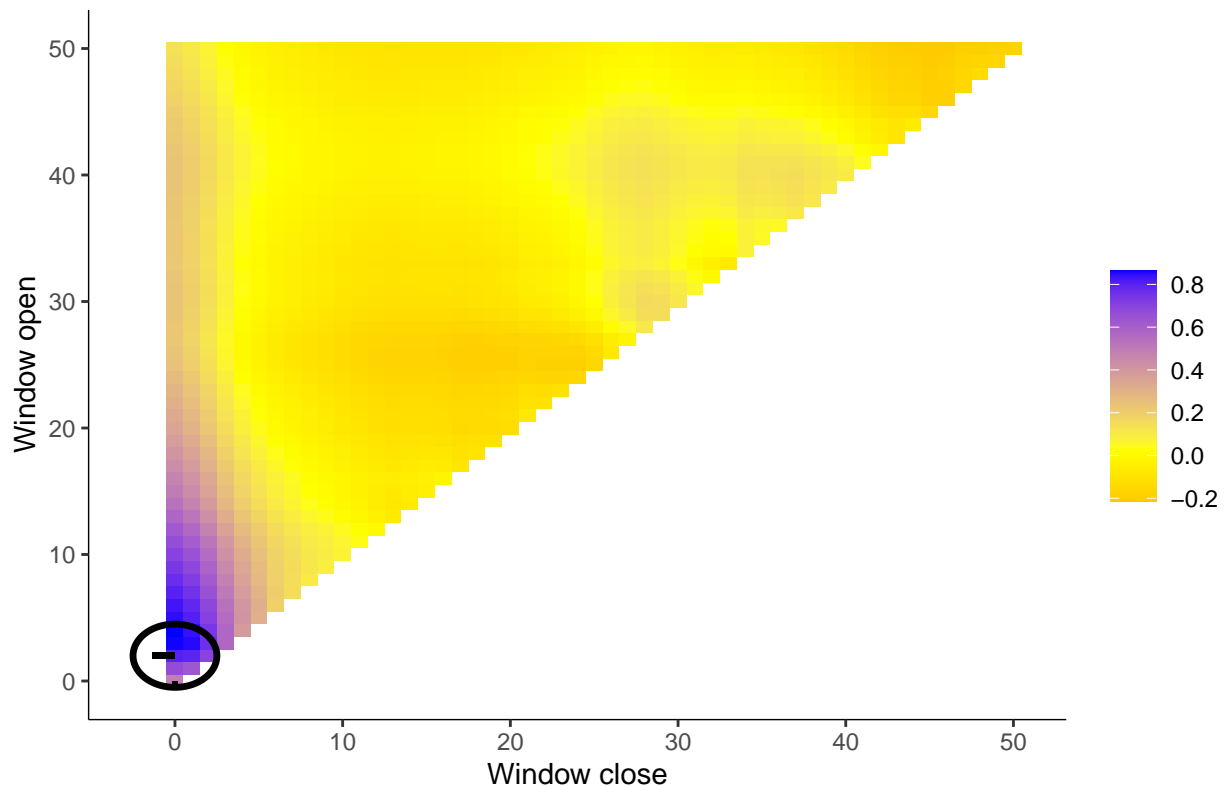

**Randwin** Using `randwin` to randomize the identity of the nestling, we are able to check if the window that was found before is actually important, or the relationship was just random.

```
# Performing randomization to identify
# likelihood of of signals occurring by chance

mass_50_rand1000 <- randwin(
  repeats = 1000,
  baseline = mass_50_basemod,
  xvar = list(temp_mean = data_clim_sub$T.daily.mean),
  stat = c("mean"),
  func = c("quad"),
  type = "relative", # relative to the individual
  range = c(50, 0),
  cinterval = "day",
  cdate = data_clim_sub$date,
  bdate = data_am_nestlings_mass_50$date_50days,
  cmissing = FALSE
)
save(mass_50_rand1000, file = "output/mass_50_rand1000.rda")

load("output/mass_50_rand1000.rda")

climwin::pvalue(
  datasetrand = mass_50_rand1000[[1]],
  dataset = mass_50_sw[[n_bestmod_mass_50]]$Dataset,
```

```
metric = "AIC",
sample.size = mass_50_sw[[n_bestmod_mass_50]]$Dataset$sample.size[1]
)
```

```
## [1] "<0.001"
```

This panel shows a histogram of all  $\Delta AICc$  values from all models run on the randomized (in grey) and the  $\Delta AICc$  of the best model fitted on the observed data (dashed line). The best climate window in the randomized data is by definition a false positive, as the randomization procedure removes any climate signal from the data. The percentage of randomizations that generates a  $\Delta AICc$  value that is at least as low as the  $\Delta AICc$  value of the best model fitted to the observed data (P value above) is a measure of how likely it is that one obtained the observed  $\Delta AICc$  by chance and thus whether the signal is likely to be real or not. In our case we can say that the candidate signal is very unlikely to be a false positive:  $P < 0.001$ .

```
climwin::plothist(
  datasetrand = mass_50_rand1000[[1]],
  dataset = mass_50_sw[[n_bestmod_mass_50]]$Dataset
)
```

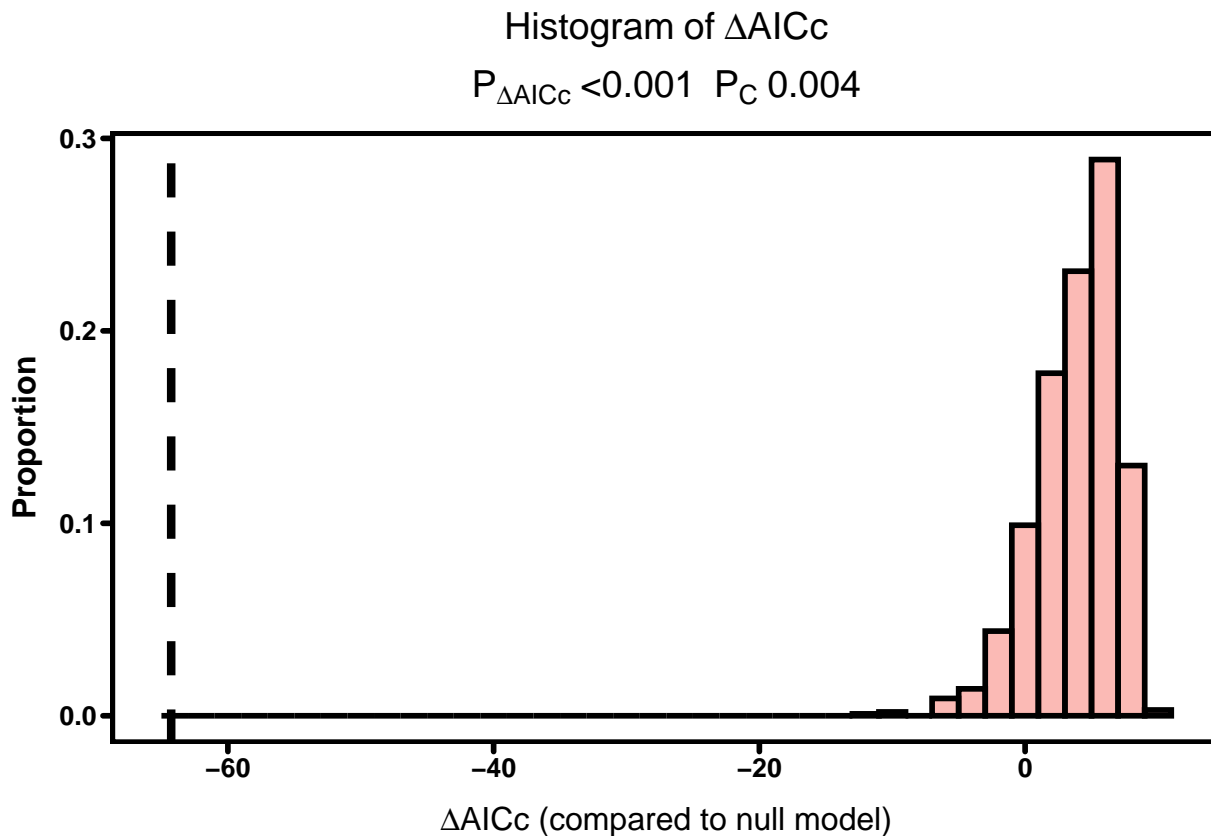

**Extracting the best window** The best window was obtained by averaging the opening and closing dates for all the best models ( $\Delta AICc < 2$ ). In the case of the body mass there was only one top model and the window opened 2 and closed 0 days before the 50 days measurement, which corresponds to the age of the nestling of 46 and 50 days old.



```

mass_50_bestsw <- singlewin(
  baseline = mass_50_basemod,
  xvar = list(
    # tr_pc1 = data_clim_sub$str_comp_1
    temp_mean = data_clim_sub$T.daily.mean
  ),
  stat = c("mean"),
  func = c("quad"),
  type = "relative",
  range = c(
    round(mean(mass_50_bestmod$WindowOpen), 0),
    round(mean(mass_50_bestmod$WindowClose), 0)
  ),
  cinterval = "day",
  cdate = data_clim_sub$date,
  bdate = data_am_nestlings_mass_50$date_50days
)

```

```
## fixed-effect model matrix is rank deficient so dropping 2 columns / coefficients
```

```

# adding the climatic variable to the mass_50 dataset
data_am_nestlings_mass_50$signal_for_mass_50 <-
  mass_50_bestsw$BestModelData$climate

```

## Adding the variables to the dataset

Extracting values for the best variable within the best window for each trait for each individual so I can use them in a glmm.

```

am_nestlings_clim <- Reduce(function(x, y) merge(x, y, all = TRUE), list(
  data_am_nestlings_wing_50,
  data_am_nestlings_sternum_50,
  data_am_nestlings_mass_50
))

```

Climatic models, quadratic effects are kept even if not significant, if present in the best model suggested by climwin.

```

wing_50_climmod <- lmer(
  wing_50 ~
    brood_size + colony +
    hatch_doy_sc + age_days_sc50 +
    signal_for_wing_50 +
    I(signal_for_wing_50^2) +
    (1 | year_f) + (1 | nestcode_rearing),
  control = lmerControl(optimizer = "bobyqa", optCtrl = list(maxfun = 1e+06)),
  data = data_am_nestlings_wing_50
)

```

```

sternum_50_climmod <- lmer(
  sternum_50 ~

```

```

    brood_size + colony +
    hatch_doy_sc + age_days_sc50 +
    signal_for_sternum_50 +
    I(signal_for_sternum_50^2) +
    (1 | year_f) + (1 | nestcode_rearing),
    control = lmerControl(optimizer = "bobyqa", optCtrl = list(maxfun = 1e+06)),
    data = data_am_nestlings_sternum_50
)

mass_50_climmod <- lmer(
  mass_50 ~
    brood_size + colony +
    hatch_doy_sc + age_days_sc50 +
    signal_for_mass_50 +
    I(signal_for_mass_50^2) +
    (1 | year_f) + (1 | nestcode_rearing),
    control = lmerControl(optimizer = "bobyqa", optCtrl = list(maxfun = 1e+06)),
    data = data_am_nestlings_mass_50
)

```

```

labels <- c(
  `(Intercept)` = "Intercept",
  hatch_doy_sc = "Hatching day",
  brood_size = "Hatching brood size",
  age_days_sc50 = "Age (days)",
  colonySolothurn = "Colony [Solothurn]",
  signal_for_wing_50 = "PC1 (age: 1-48)",
  `I(signal_for_wing_50^2)` = "PC1 (age: 1-48) 2",
  signal_for_sternum_50 = "PC1 (age: 12-34)",
  `I(signal_for_sternum_50^2)` = "PC1 (age: 12-34) 2",
  signal_for_mass_50 = "Temp (age: 48-50)",
  `I(signal_for_mass_50^2)` = "Temp (age: 48-50) 2"
)

sjPlot::tab_model(
  wing_50_climmod,
  sternum_50_climmod,
  mass_50_climmod,
  file = "output/Tab_wicm_models_50.doc",
  string.est = "Estimate",
  string.se = "SE",
  show.ci = FALSE,
  show.se = TRUE,
  show.stat = FALSE,
  show.df = FALSE,
  pred.labels = labels
)

```

## Figure

```

cowplot::plot_grid(
  fun_climres(wing_50_climmod, data_am_nestlings_wing_50),

```

```

fun_climres(sternum_50_climmod, data_am_nestlings_sternum_50),
fun_climres(mass_50_climmod, data_am_nestlings_mass_50),
ncol = 1, align = c("v", "h")
)

```

```

# Save the plot to the figures directory
ggsave("figures/Fig. 2 - traits-weather.png", width = 4, height = 8, dpi = 300)

```

## Testing for segments

```

sternum_50_climlme <- lme(
  sternum_50 ~
    signal_for_sternum_50 +
    # I(signal_for_sternum_50^2) +
    brood_size + colony +
    hatch_doy_sc + age_days_sc50,
  random = list(~ 1 | year_f, ~ 1 | nestcode_rearing),
  control = lmerControl(optimizer = "bobyqa", optCtrl = list(maxfun = 1e+06)),
  data = data_am_nestlings_sternum_50
)

sternum_50_climmod_segmented <- segmented(sternum_50_climlme,
  seg.Z = ~signal_for_sternum_50, psi = 0.4,
  random = list(
    year_f = pdDiag(~ 1 + signal_for_sternum_50 + U),
    nestcode_rearing = pdDiag(~ 1 + signal_for_sternum_50 + U)
  )
)
save(sternum_50_climmod_segmented,
  file = "output/sternum_50_climmod_segmented_04.rda"
)

sternum_50_climmod_segmented <- segmented(sternum_50_climlme,
  seg.Z = ~signal_for_sternum_50, psi = 0,
  random = list(
    year_f = pdDiag(~ 1 + signal_for_sternum_50 + U),
    nestcode_rearing = pdDiag(~ 1 + signal_for_sternum_50 + U)
  )
)
save(sternum_50_climmod_segmented,
  file = "output/sternum_50_climmod_segmented_0.rda"
)

sternum_50_climmod_segmented <- segmented(sternum_50_climlme,
  seg.Z = ~signal_for_sternum_50, psi = 0.8,
  random = list(
    year_f = pdDiag(~ 1 + signal_for_sternum_50 + U),
    nestcode_rearing = pdDiag(~ 1 + signal_for_sternum_50 + U)
  )
)

```

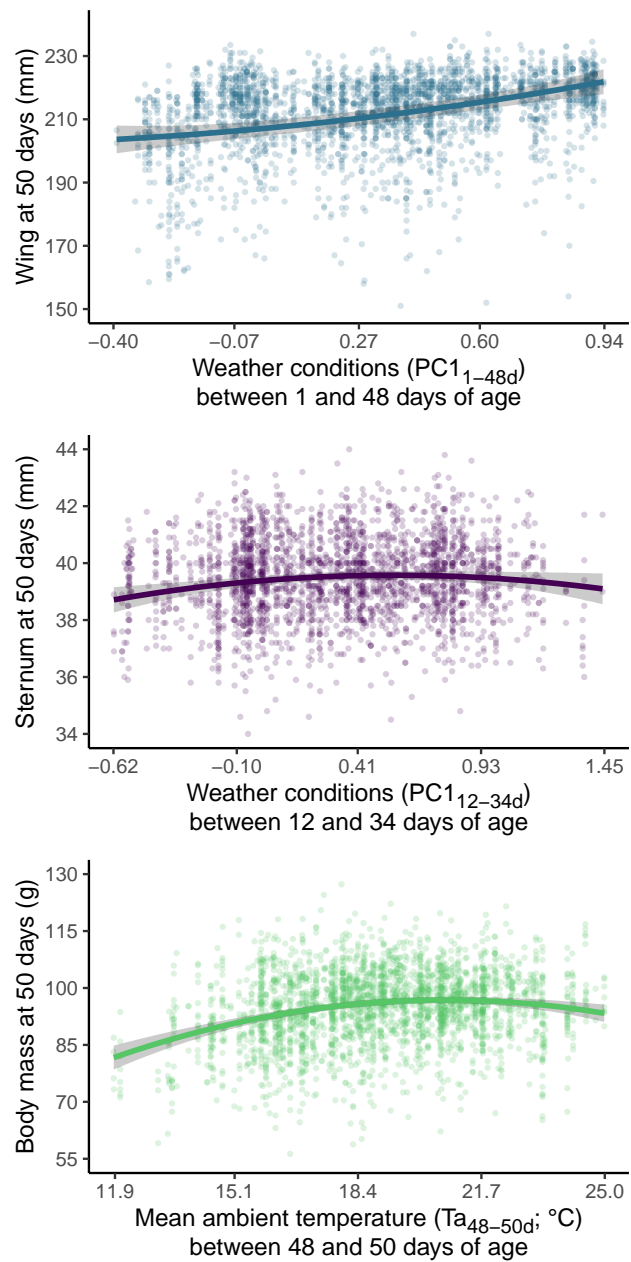

Figure 3: Fig. 2 - Variation in wing length, sternum length and body mass of 50-day-old nestling Alpine swifts in relation to weather conditions encountered earlier in their development. Weather conditions resulted from a principal component analysis (PC1) between daily average temperature and daily rain, and traits were affected by weather conditions over different time windows. Low PC1 values indicate cold and rainy days, and high values indicate sunny and warm days. Solid lines (and 95% confidence intervals) are predictions from the models presented in Table 2. Climatic windows are reported using the nestling's age as a reference.

```
save(sternum_50_climmod_segmented,
     file = "output/sternum_50_climmod_segmented_08.rda"
)
```

**Sternum length** Summary of the segmented analysis

psi = 0

```
load("output/sternum_50_climmod_segmented_0.rda")
summary(sternum_50_climmod_segmented)
```

```
## Segmented mixed-effects model fit by REML
##      AIC      BIC   logLik
## 8498.841 8585.837 -4234.42
## Bootstrap restarting on 10 samples; 3 different solution(s)
##
## Random effects:
## Formula: ~1 + signal_for_sternum_50 + U | year_f
## Structure: Diagonal
##      (Intercept) signal_for_sternum_50          U
## StdDev:  0.2020344          0.3586896 0.0001815599
##
## Formula: ~1 + signal_for_sternum_50 + U | nestcode_rearing %in% year_f
## Structure: Diagonal
##      (Intercept) signal_for_sternum_50          U Residual
## StdDev:  0.5877018          0.1656474 0.03823937  1.23168
##
## Fixed effects:
##              Value Std.Error   DF t-value p-value
## (Intercept)  41.38751  0.84875 1252  48.763  0.000
## bsh_ax      -0.34937  0.04905 1166  -7.122  0.000
## colonySolothurn  0.17642  0.06835 1166   2.581  0.010
## hatch_doy_sc   -0.22559  0.04076 1252  -5.535  0.000
## age_days_sc50  0.08825  0.02050 1252   4.305  0.000
## -- leftS:
## signal_for_sternum_50  3.42086  1.69671 1252   2.016  0.044
## -- diffS:
## U                  -3.25225  1.70482 1252  -1.908
## -- break:
## GO                  -0.37101  0.08845 1166
## psi.link = identity
##
## Standardized Within-Group Residuals:
##      Min      Q1      Med      Q3      Max
## -6.12336881 -0.57426371  0.01170877  0.59116152  2.82134160
##
## Number of Observations: 2447
## Number of Groups:
##              year_f nestcode_rearing %in% year_f
##              22              1191
```

```
mean(sternum_50_climmod_segmented$psi)
```

```
## [1] -0.3552971
```

```
psi = 0.4
```

```
load("output/sternum_50_climmod_segmented_04.rda")  
summary(sternum_50_climmod_segmented)
```

```
## Segmented mixed-effects model fit by REML  
##      AIC      BIC    logLik  
## 8499.856 8586.852 -4234.928  
## Bootstrap restarting on 10 samples; 3 different solution(s)  
##  
## Random effects:  
## Formula: ~1 + signal_for_sternum_50 + U | year_f  
## Structure: Diagonal  
##      (Intercept) signal_for_sternum_50      U  
## StdDev: 0.2453159      0.01219222 1.547717  
##  
## Formula: ~1 + signal_for_sternum_50 + U | nestcode_rearing %in% year_f  
## Structure: Diagonal  
##      (Intercept) signal_for_sternum_50      U Residual  
## StdDev: 0.5949472      1.927089e-05 7.278493e-09 1.231978  
##  
## Fixed effects:  
##      Value Std.Error DF t-value p-value  
## (Intercept)      40.16049 0.15477 1253 259.485 0.0000  
## bsh_ax      -0.35298 0.04909 1165 -7.190 0.0000  
## colonySolothurn      0.15740 0.06825 1165 2.306 0.0213  
## hatch_doy_sc      -0.20187 0.04117 1253 -4.903 0.0000  
## age_days_sc50      0.09706 0.02042 1253 4.752 0.0000  
## -- leftS:  
## signal_for_sternum_50 0.45642 0.15092 1253 3.024 0.0025  
## -- diffS:  
## U      -1.68317 1.25816 1165 -1.338  
## -- break:  
## GO      0.81258 0.11778 1165  
## psi.link = identity  
##  
## Standardized Within-Group Residuals:  
##      Min      Q1      Med      Q3      Max  
## -6.113264015 -0.575664046 0.009521131 0.582781653 2.815703002  
##  
## Number of Observations: 2447  
## Number of Groups:  
##      year_f nestcode_rearing %in% year_f  
##      22      1191
```

```
mean(sternum_50_climmod_segmented$psi)
```

```
## [1] 0.8377074
```

psi = 0.8

```
load("output/sternum_50_climmod_segmented_08.rda")
summary(sternum_50_climmod_segmented)
```

```
## Segmented mixed-effects model fit by REML
##      AIC      BIC    logLik
## 8499.863 8586.86 -4234.932
## Bootstrap restarting on 10 samples; 3 different solution(s)
##
## Random effects:
## Formula: ~1 + signal_for_sternum_50 + U | year_f
## Structure: Diagonal
##      (Intercept) signal_for_sternum_50      U
## StdDev: 0.2473956      0.01030922 1.330668
##
## Formula: ~1 + signal_for_sternum_50 + U | nestcode_rearing %in% year_f
## Structure: Diagonal
##      (Intercept) signal_for_sternum_50      U Residual
## StdDev: 0.594737      1.882626e-05 9.555731e-09 1.232142
##
## Fixed effects:
##      Value Std.Error  DF t-value p-value
## (Intercept) 40.15957 0.15500 1253 259.101 0.0000
## bsh_ax -0.35267 0.04910 1165 -7.182 0.0000
## colonySolothurn 0.15726 0.06834 1165 2.301 0.0216
## hatch_doy_sc -0.20197 0.04120 1253 -4.902 0.0000
## age_days_sc50 0.09701 0.02043 1253 4.749 0.0000
## -- leftS:
## signal_for_sternum_50 0.46091 0.15169 1253 3.038 0.0024
## -- diffS:
## U -1.60754 1.14038 1165 -1.410
## -- break:
## GO 0.87940 0.11584 1165
## psi.link = identity
##
## Standardized Within-Group Residuals:
##      Min      Q1      Med      Q3      Max
## -6.113739944 -0.575721368 0.009786115 0.582781417 2.815736437
##
## Number of Observations: 2447
## Number of Groups:
##      year_f nestcode_rearing %in% year_f
##      22      1191
```

```
mean(sternum_50_climmod_segmented$psi)
```

```
## [1] 0.874424
```

The threshold found can be quite different, it seems it's not possible to identify a consistent break point, thus we decided not to use the threshold approach for the sternum length.

```

mass_50_climlme <- lme(
  mass_50 ~
    signal_for_mass_50 +
    # I(signal_for_mass_50^2) +
    brood_size + colony +
    hatch_doy_sc + age_days_sc50,
  random = list(~ 1 | year_f, ~ 1 | nestcode_rearing),
  control = lmerControl(optimizer = "bobyqa", optCtrl = list(maxfun = 1e+06)),
  data = data_am_nestlings_mass_50
)

mass_50_climmod_segmented <- segmented(mass_50_climlme,
  seg.Z = ~signal_for_mass_50, psi = 20,
  random = list(
    year_f = pdDiag(~ 1 + signal_for_mass_50 + U),
    nestcode_rearing = pdDiag(~ 1 + signal_for_mass_50 + U)
  )
)

save(mass_50_climmod_segmented, file = "output/mass_50_climmod_segmented_20.rda")

mass_50_climmod_segmented <- segmented(mass_50_climlme,
  seg.Z = ~signal_for_mass_50, psi = 19,
  random = list(
    year_f = pdDiag(~ 1 + signal_for_mass_50 + U),
    nestcode_rearing = pdDiag(~ 1 + signal_for_mass_50 + U)
  )
)

save(mass_50_climmod_segmented, file = "output/mass_50_climmod_segmented_19.rda")

mass_50_climmod_segmented <- segmented(mass_50_climlme,
  seg.Z = ~signal_for_mass_50, psi = 21,
  random = list(
    year_f = pdDiag(~ 1 + signal_for_mass_50 + U),
    nestcode_rearing = pdDiag(~ 1 + signal_for_mass_50 + U)
  )
)

save(mass_50_climmod_segmented, file = "output/mass_50_climmod_segmented_21.rda")

mass_50_climmod_segmented <- segmented(mass_50_climlme,
  seg.Z = ~signal_for_mass_50, psi = 22,
  random = list(
    year_f = pdDiag(~ 1 + signal_for_mass_50 + U),
    nestcode_rearing = pdDiag(~ 1 + signal_for_mass_50 + U)
  )
)

save(mass_50_climmod_segmented, file = "output/mass_50_climmod_segmented_22.rda")

mass_50_climmod_segmented <- segmented(mass_50_climlme,
  seg.Z = ~signal_for_mass_50, psi = 23,
  random = list(
    year_f = pdDiag(~ 1 + signal_for_mass_50 + U),

```



```

    nestcode_rearing = pdDiag(~ 1 + signal_for_mass_50 + U)
  )
)
save(mass_50_climmod_segmented, file = "output/mass_50_climmod_segmented_23.rda")

mass_50_climmod_segmented <- segmented(mass_50_climlme,
  seg.Z = ~signal_for_mass_50, psi = 16,
  random = list(
    year_f = pdDiag(~ 1 + signal_for_mass_50 + U),
    nestcode_rearing = pdDiag(~ 1 + signal_for_mass_50 + U)
  )
)
save(mass_50_climmod_segmented, file = "output/mass_50_climmod_segmented_16.rda")

mass_50_climmod_segmented2 <- segmented(mass_50_climlme,
  seg.Z = ~signal_for_mass_50, psi = c(17, 22),
  random = list(
    year_f = pdDiag(~ 1 + signal_for_mass_50 + U),
    nestcode_rearing = pdDiag(~ 1 + signal_for_mass_50 + U)
  )
)
save(mass_50_climmod_segmented2,
  file = "output/mass_50_climmod_segmented_2-17-22.rda"
)

```

**Body mass** The analysis was repeated using different starting values ( $\psi$ ) to check if that was affecting the threshold found. Summary of the segmented analysis:

$\psi = 16$

```

load("output/mass_50_climmod_segmented_16.rda")
summary(mass_50_climmod_segmented)

```

```

## Segmented mixed-effects model fit by REML
##      AIC      BIC    logLik
## 19090.38 19178.82 -9530.191
## Bootstrap restarting on 10 samples; 6 different solution(s)
##
## Random effects:
## Formula: ~1 + signal_for_mass_50 + U | year_f
## Structure: Diagonal
##      (Intercept) signal_for_mass_50      U
## StdDev:    2.513369      0.001395197 1.266925
##
## Formula: ~1 + signal_for_mass_50 + U | nestcode_rearing %in% year_f
## Structure: Diagonal
##      (Intercept) signal_for_mass_50      U Residual
## StdDev:    5.292576      0.01473296 0.05008139 6.791907
##
## Fixed effects:
##      Value Std.Error DF t-value p-value
## (Intercept)    69.3383   3.7229 1381  18.625  0.0000
## bsh_ax         -2.4003   0.3154 1280  -7.611  0.0000

```

```

## colonySolothurn      2.5634      0.4577 1280      5.601      0.0000
## hatch_doy_sc         -1.5504      0.2994 1381     -5.179      0.0000
## age_days_sc50        0.2206      0.1344 1381      1.642      0.1009
## -- leftS:
## signal_for_mass_50   1.7136      0.2055 1381      8.338      0.0000
## -- diffS:
## U                    -2.3270      0.4935 1381     -4.715
## -- break:
## G0                   19.1590      0.2900 1381
## psi.link = identity
##
## Standardized Within-Group Residuals:
##      Min      Q1      Med      Q3      Max
## -3.85009835 -0.48382193  0.03584051  0.53958220  4.12865580
##
## Number of Observations: 2693
## Number of Groups:
##                year_f nestcode_rearing %in% year_f
##                25                1307

```

psi = 20

```

load("output/mass_50_climmod_segmented_20.rda")
summary(mass_50_climmod_segmented)

```

```

## Segmented mixed-effects model fit by REML
##      AIC      BIC      logLik
## 19090.37 19178.81 -9530.185
## Bootstrap restarting on 10 samples; 3 different solution(s)
##
## Random effects:
## Formula: ~1 + signal_for_mass_50 + U | year_f
## Structure: Diagonal
##      (Intercept) signal_for_mass_50      U
## StdDev:      2.515159      0.001408265 1.241755
##
## Formula: ~1 + signal_for_mass_50 + U | nestcode_rearing %in% year_f
## Structure: Diagonal
##      (Intercept) signal_for_mass_50      U Residual
## StdDev:      5.292365      0.01483897 0.04884255 6.792138
##
## Fixed effects:
##      Value Std.Error  DF t-value p-value
## (Intercept) 69.0893  3.7867 1381 18.245 0.0000
## bsh_ax      -2.3988  0.3154 1280 -7.606 0.0000
## colonySolothurn 2.5624  0.4577 1280  5.598 0.0000
## hatch_doy_sc   -1.5507  0.2994 1381 -5.179 0.0000
## age_days_sc50  0.2198  0.1344 1381  1.636 0.1022
## -- leftS:
## signal_for_mass_50 1.7290  0.2097 1381  8.244 0.0000
## -- diffS:
## U              -2.3166  0.4864 1381 -4.763
## -- break:

```

```

## G0          19.1349    0.2908 1381
## psi.link = identity
##
## Standardized Within-Group Residuals:
##      Min      Q1      Med      Q3      Max
## -3.85069006 -0.48266406  0.03708332  0.54051849  4.12827680
##
## Number of Observations: 2693
## Number of Groups:
##           year_f nestcode_rearing %in% year_f
##           25          1307

```

psi = 21

```

load("output/mass_50_climmod_segmented_21.rda")
summary(mass_50_climmod_segmented)

```

```

## Segmented mixed-effects model fit by REML
##      AIC      BIC    logLik
## 19090.4 19178.83 -9530.198
## Bootstrap restarting on 10 samples; 2 different solution(s)
##
## Random effects:
## Formula: ~1 + signal_for_mass_50 + U | year_f
## Structure: Diagonal
##      (Intercept) signal_for_mass_50      U
## StdDev:      2.52527      0.001413049 1.223453
##
## Formula: ~1 + signal_for_mass_50 + U | nestcode_rearing %in% year_f
## Structure: Diagonal
##      (Intercept) signal_for_mass_50      U Residual
## StdDev:      5.292029      0.01488652 0.04727261 6.792072
##
## Fixed effects:
##           Value Std.Error  DF t-value p-value
## (Intercept)  68.8372   3.8157 1381  18.041  0.0000
## bsh_ax      -2.3970   0.3154 1280  -7.600  0.0000
## colonySolothurn  2.5624   0.4578 1280   5.598  0.0000
## hatch_doy_sc   -1.5508   0.2997 1381  -5.175  0.0000
## age_days_sc50   0.2184   0.1345 1381   1.624  0.1046
## -- leftS:
## signal_for_mass_50 1.7446   0.2117 1381   8.243  0.0000
## -- diffS:
## U              -2.3077   0.4820 1381  -4.788
## -- break:
## G0          19.1047    0.2927 1381
## psi.link = identity
##
## Standardized Within-Group Residuals:
##      Min      Q1      Med      Q3      Max
## -3.85137691 -0.48288586  0.03695215  0.53929450  4.12791184
##
## Number of Observations: 2693

```

```
## Number of Groups:
##           year_f nestcode_rearing %in% year_f
##           25           1307
```

psi = 22

```
load("output/mass_50_climmod_segmented_22.rda")
summary(mass_50_climmod_segmented)
```

```
## Segmented mixed-effects model fit by REML
##      AIC      BIC    logLik
## 19090.4 19178.83 -9530.198
## Bootstrap restarting on 10 samples; 2 different solution(s)
##
## Random effects:
## Formula: ~1 + signal_for_mass_50 + U | year_f
## Structure: Diagonal
##      (Intercept) signal_for_mass_50      U
## StdDev:      2.52527      0.001413049 1.223453
##
## Formula: ~1 + signal_for_mass_50 + U | nestcode_rearing %in% year_f
## Structure: Diagonal
##      (Intercept) signal_for_mass_50      U Residual
## StdDev:      5.292029      0.01488652 0.04727261 6.792072
##
## Fixed effects:
##           Value Std.Error  DF t-value p-value
## (Intercept)  68.8372   3.8157 1381  18.041  0.0000
## bsh_ax      -2.3970   0.3154 1280  -7.600  0.0000
## colonySolothurn  2.5624   0.4578 1280   5.598  0.0000
## hatch_doy_sc   -1.5508   0.2997 1381  -5.175  0.0000
## age_days_sc50   0.2184   0.1345 1381   1.624  0.1046
## -- leftS:
## signal_for_mass_50 1.7446   0.2117 1381   8.243  0.0000
## -- diffS:
## U                -2.3077   0.4820 1381  -4.788
## -- break:
## G0                19.1047   0.2927 1381
## psi.link = identity
##
## Standardized Within-Group Residuals:
##      Min      Q1      Med      Q3      Max
## -3.85137692 -0.48288586 0.03695216 0.53929450 4.12791184
##
## Number of Observations: 2693
## Number of Groups:
##           year_f nestcode_rearing %in% year_f
##           25           1307
```

psi = 23

```
load("output/mass_50_climmod_segmented_23.rda")
summary(mass_50_climmod_segmented)
```

```
## Segmented mixed-effects model fit by REML
##      AIC      BIC    logLik
## 19090.37 19178.81 -9530.186
## Bootstrap restarting on 10 samples; 1 different solution(s)
##
## Random effects:
## Formula: ~1 + signal_for_mass_50 + U | year_f
## Structure: Diagonal
##      (Intercept) signal_for_mass_50      U
## StdDev:    2.512856      0.001400537 1.262121
##
## Formula: ~1 + signal_for_mass_50 + U | nestcode_rearing %in% year_f
## Structure: Diagonal
##      (Intercept) signal_for_mass_50      U Residual
## StdDev:    5.292569      0.01476722 0.04996561 6.79192
##
## Fixed effects:
##      Value Std.Error  DF t-value p-value
## (Intercept)    69.2932   3.7285 1381  18.585 0.0000
## bsh_ax         -2.4001   0.3154 1280  -7.610 0.0000
## colonySolothurn 2.5631   0.4577 1280   5.600 0.0000
## hatch_doy_sc   -1.5504   0.2994 1381  -5.179 0.0000
## age_days_sc50  0.2205   0.1344 1381   1.641 0.1011
## -- leftS:
## signal_for_mass_50 1.7164   0.2059 1381   8.336 0.0000
## -- diffS:
## U                -2.3252   0.4927 1381  -4.719
## -- break:
## G0                19.1538   0.2872 1381
## psi.link = identity
##
## Standardized Within-Group Residuals:
##      Min      Q1      Med      Q3      Max
## -3.85021117 -0.48336447 0.03608181 0.53985955 4.12859034
##
## Number of Observations: 2693
## Number of Groups:
##      year_f nestcode_rearing %in% year_f
##      25      1307
```

psi = 19

```
load("output/mass_50_climmod_segmented_19.rda")
summary(mass_50_climmod_segmented)
```

```
## Segmented mixed-effects model fit by REML
##      AIC      BIC    logLik
## 19090.4 19178.83 -9530.198
## Bootstrap restarting on 10 samples; 2 different solution(s)
```

```

##
## Random effects:
## Formula: ~1 + signal_for_mass_50 + U | year_f
## Structure: Diagonal
##      (Intercept) signal_for_mass_50      U
## StdDev:    2.525282      0.001413091 1.223397
##
## Formula: ~1 + signal_for_mass_50 + U | nestcode_rearing %in% year_f
## Structure: Diagonal
##      (Intercept) signal_for_mass_50      U Residual
## StdDev:    5.292029      0.01488681 0.04726972 6.792072
##
## Fixed effects:
##      Value Std.Error  DF t-value p-value
## (Intercept)    68.8366   3.8157 1381  18.040  0.0000
## bsh_ax         -2.3970   0.3154 1280  -7.600  0.0000
## colonySolithurn  2.5624   0.4578 1280   5.598  0.0000
## hatch_doy_sc    -1.5508   0.2997 1381  -5.175  0.0000
## age_days_sc50   0.2184   0.1345 1381   1.624  0.1046
## -- leftS:
## signal_for_mass_50  1.7446   0.2117 1381   8.243  0.0000
## -- diffS:
## U                -2.3077   0.4819 1381  -4.788
## -- break:
## G0                19.1046   0.2927 1381
## psi.link = identity
##
## Standardized Within-Group Residuals:
##      Min      Q1      Med      Q3      Max
## -3.85137870 -0.48288665  0.03695542  0.53929255  4.12791094
##
## Number of Observations: 2693
## Number of Groups:
##      year_f nestcode_rearing %in% year_f
##      25      1307

```

All the threshold found are very similar, this we decided to use the threshold identified by this last model. The threshold is at 19.1531402 according to the segmented analysis. The two slopes (before and after the point) are:

```

segmented_threshold <- mean(mass_50_climmod_segmented$psi)

data_am_nestlings_mass_501 <- subset(
  data_am_nestlings_mass_50,
  signal_for_mass_50 < segmented_threshold
)
data_am_nestlings_mass_502 <- subset(
  data_am_nestlings_mass_50,
  signal_for_mass_50 > segmented_threshold
)

```

**Before the point**

```

mass_50_climmod1 <- lmer(
  mass_50 ~
    signal_for_mass_50 +
    brood_size + colony +
    hatch_doy_sc + age_days_sc50 +
    (1 | year_f) + (1 | nestcode_rearing),
  control = lmerControl(optimizer = "bobyqa", optCtrl = list(maxfun = 1e+06)),
  data = data_am_nestlings_mass_501
)
summary(mass_50_climmod1)

## Linear mixed model fit by REML. t-tests use Satterthwaite's method ['lmerModLmerTest']
## Formula: mass_50 ~ signal_for_mass_50 + brood_size + colony + hatch_doy_sc +
##   age_days_sc50 + (1 | year_f) + (1 | nestcode_rearing)
## Data: data_am_nestlings_mass_501
## Control: lmerControl(optimizer = "bobyqa", optCtrl = list(maxfun = 1e+06))
##
## REML criterion at convergence: 10315.7
##
## Scaled residuals:
##   Min       1Q   Median       3Q      Max
## -3.7567 -0.4819  0.0292  0.5206  4.0466
##
## Random effects:
##   Groups                Name            Variance Std.Dev.
## nestcode_rearing (Intercept) 32.330    5.686
## year_f            (Intercept)  7.895    2.810
## Residual                            48.426    6.959
## Number of obs: 1443, groups: nestcode_rearing, 715; year_f, 25
##
## Fixed effects:
##              Estimate Std. Error    df t value Pr(>|t|)
## (Intercept)    69.4941    4.5005 387.7888  15.442 < 2e-16 ***
## signal_for_mass_50  1.7663    0.2474 470.9707   7.139 3.58e-12 ***
## brood_size      -2.9802    0.4531 805.4378  -6.577 8.64e-11 ***
## colonySolothurn  3.2735    0.6450 655.8994   5.076 5.04e-07 ***
## hatch_doy_sc    -1.2887    0.4053 146.5579  -3.180 0.0018 **
## age_days_sc50     0.3164    0.1788 713.6018   1.770 0.0772 .
## ---
## Signif. codes:  0 '***' 0.001 '**' 0.01 '*' 0.05 '.' 0.1 ' ' 1
##
## Correlation of Fixed Effects:
##              (Intr) s___50 brd_sz clnySl htch__
## sgnl_fr__50 -0.950
## brood_size  -0.239 -0.014
## colnySlthrn -0.079 -0.007 -0.054
## hatch_dy_sc -0.197  0.134  0.138  0.094
## ag_dys_sc50 -0.009  0.049 -0.123 -0.108 -0.033

car::Anova(mass_50_climmod1)

## Analysis of Deviance Table (Type II Wald chisquare tests)

```

```
##
## Response: mass_50
##               Chisq Df Pr(>Chisq)
## signal_for_mass_50 50.9685  1 9.386e-13 ***
## brood_size         43.2537  1 4.808e-11 ***
## colony             25.7608  1 3.865e-07 ***
## hatch_doy_sc      10.1116  1 0.001473 **
## age_days_sc50     3.1329  1 0.076728 .
## ---
## Signif. codes:  0 '***' 0.001 '**' 0.01 '*' 0.05 '.' 0.1 ' ' 1
```

## After the point

```
mass_50_climmod2 <- lmer(
  mass_50 ~
    signal_for_mass_50 +
    # I(signal_for_mass_50^2) +
    brood_size + colony +
    hatch_doy_sc + age_days_sc50 +
    (1 | year_f) + (1 | nestcode_rearing),
  control = lmerControl(optimizer = "bobyqa", optCtrl = list(maxfun = 1e+06)),
  data = data_am_nestlings_mass_502
)
summary(mass_50_climmod2)
```

```
## Linear mixed model fit by REML. t-tests use Satterthwaite's method ['lmerModLmerTest']
## Formula: mass_50 ~ signal_for_mass_50 + brood_size + colony + hatch_doy_sc +
##   age_days_sc50 + (1 | year_f) + (1 | nestcode_rearing)
## Data: data_am_nestlings_mass_502
## Control: lmerControl(optimizer = "bobyqa", optCtrl = list(maxfun = 1e+06))
##
## REML criterion at convergence: 8717.9
##
## Scaled residuals:
##   Min       1Q   Median       3Q      Max
## -3.6675 -0.4777  0.0479  0.5484  2.6921
##
## Random effects:
##   Groups             Name                Variance Std.Dev.
## nestcode_rearing (Intercept) 25.133    5.013
## year_f             (Intercept)  1.622    1.274
## Residual                                42.829    6.544
## Number of obs: 1250, groups: nestcode_rearing, 597; year_f, 24
##
## Fixed effects:
##              Estimate Std. Error      df t value Pr(>|t|)
## (Intercept)  110.12453   5.05255 204.70678  21.796 < 2e-16 ***
## signal_for_mass_50 -0.47951   0.23259 205.55329  -2.062 0.040504 *
## brood_size      -1.88957   0.43565 745.90016  -4.337 1.64e-05 ***
## colonySolothurn  2.25863   0.62198 442.01146   3.631 0.000315 ***
## hatch_doy_sc    -1.91266   0.36992  71.14396  -5.170 2.06e-06 ***
## age_days_sc50   -0.07131   0.20929 557.30963  -0.341 0.733429
## ---
```



```
## Signif. codes:  0 '***' 0.001 '**' 0.01 '*' 0.05 '.' 0.1 ' ' 1
##
## Correlation of Fixed Effects:
##      (Intr) s___50 brd_sz clnySl htch__
## sgnl_fr__50 -0.968
## brood_size  -0.204 -0.021
## colnySlthrn -0.041 -0.029 -0.049
## hatch_dy_sc -0.044  0.034  0.066 -0.028
## ag_dys_sc50 -0.012  0.042 -0.024 -0.223  0.058
```

```
car::Anova(mass_50_climmod2)
```

```
## Analysis of Deviance Table (Type II Wald chisquare tests)
##
## Response: mass_50
##              Chisq Df Pr(>Chisq)
## signal_for_mass_50  4.2502  1  0.0392456 *
## brood_size         18.8125  1  1.442e-05 ***
## colony             13.1869  1  0.0002819 ***
## hatch_doy_sc       26.7339  1  2.335e-07 ***
## age_days_sc50      0.1161  1  0.7333002
## ---
## Signif. codes:  0 '***' 0.001 '**' 0.01 '*' 0.05 '.' 0.1 ' ' 1
```

```
clim_predict <-
  data.frame(effects::effect("signal_for_mass_50",
    mass_50_climmod,
    partial.residuals = TRUE
  ))
clim_predict_01 <-
  data.frame(effects::effect("signal_for_mass_50",
    mass_50_climmod1,
    partial.residuals = TRUE
  ))
clim_predict_02 <-
  data.frame(effects::effect("signal_for_mass_50",
    mass_50_climmod2,
    partial.residuals = TRUE
  ))

par_xmin <- round(min(data_am_nestlings_mass_50$signal_for_mass_50) - 0.005, 2)
par_xmax <- round(max(data_am_nestlings_mass_50$signal_for_mass_50) + 0.005, 2)

plot_clim_mass_50 <- ggplot(
  clim_predict,
  aes(signal_for_mass_50, fit)
) +
  geom_point(
    data = data_am_nestlings_mass_50,
    aes(
```

```

    x = signal_for_mass_50,
    y = mass_50
  ),
  col = par_col_mass_50,
  size = 1, shape = 16, alpha = 0.2
) +
geom_vline(
  xintercept = segmented_threshold,
  linetype = "dashed",
  color = "dodgerblue"
) +
geom_ribbon(
  data = clim_predict_01,
  aes(ymin = lower, ymax = upper),
  alpha = .25
) +
geom_line(
  data = clim_predict_01, aes(signal_for_mass_50, fit),
  col = "darkgreen",
  linewidth = 1.2
) +
geom_ribbon(
  data = clim_predict_02,
  aes(ymin = lower, ymax = upper),
  alpha = .25
) +
geom_line(
  data = clim_predict_02, aes(signal_for_mass_50, fit),
  col = "#20b2aa",
  linewidth = 1.2
) +
theme(
  legend.position = "none",
  panel.grid.major = element_blank(),
  panel.grid.minor = element_blank(),
  panel.background = element_blank(),
  axis.line = element_line(colour = "black"),
  axis.title.x = element_markdown()
) +
xlab(
  "Mean ambient temperature (Ta<sub>48-50d</sub>; °C)<br>between 48 and 50 days of age"
) +
ylab("Body mass at 50 days (g)") +
scale_y_continuous(
  limits = c(55, 130),
  breaks = c(seq(55, 150, 15))
) +
scale_x_continuous(
  limits = c(par_xmin, par_xmax),
  breaks = c(round(seq(
    par_xmin, par_xmax,
    (par_xmax - par_xmin) / 4
  ), 1))
), 1))

```

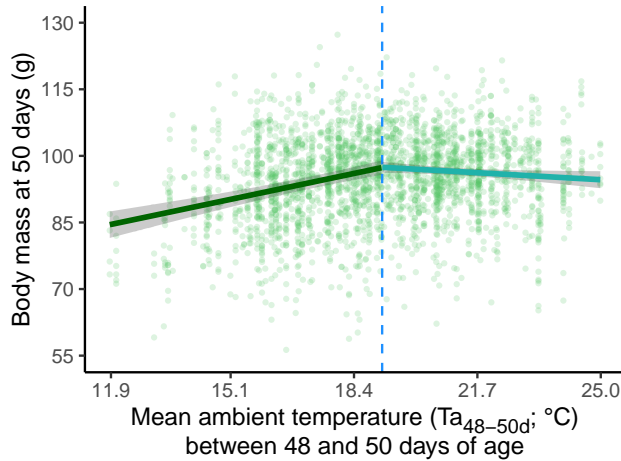

Figure 4: Fig. 3 - Variation in body mass of 50-day-old nestling Alpine swifts in relation to daily average temperature in the 2 days before the measurement. The analysis using the segmented package identified a threshold at 19.1°C. Solid lines (and 95% confidence intervals) are predictions from the models presented in Table 2. Climatic windows are reported using the nestling's age as a reference.

)

## Figure

plot\_clim\_mass\_50

```
# Save the plot to the figures directory
ggsave("figures/Fig. 3 - mass-weather_segmented.png", width = 4, height = 3, dpi = 300)
```

## Supporting Information 02: Growth rates

To estimate growth rates, I extracted the slope of the linear regression between the measurements of the trait within the windows identified by the climwin analyses.

```
# Growth rates -----
am_growth_wing <- data_am_nestlings_all %>%
  subset(!is.na(wing)) %>%
  subset(age_days <= 48) %>%
  subset(age_days >= 1) %>%
  group_by(ring) %>%
  mutate(
    wing_n_measures = n()
  ) %>%
  ungroup()

am_growth_wing <- am_growth_wing %>%
  subset(!is.na(wing_n_measures) & wing_n_measures > 2) %>%
  dplyr::select(ring, wing, age_days, wing_n_measures) %>%
```

```

distinct() %>%
group_by(ring) %>%
mutate(
  wing_growth = coefficients(lm(wing ~ age_days))[2],
  wing_r2 = summary(lm(wing ~ age_days))$r.squared
) %>%
ungroup() %>%
dplyr::select(
  ring, wing_growth, wing_n_measures, wing_r2
) %>%
distinct()

```

```

## Warning: There were 6 warnings in `mutate()`.
## The first warning was:
## i In argument: `wing_r2 = summary(lm(wing ~ age_days))$r.squared`.
## i In group 61: `ring = ring_000074`.
## Caused by warning in `summary.lm()`:
## ! essentially perfect fit: summary may be unreliable
## i Run `dplyr::last_dplyr_warnings()` to see the 5 remaining warnings.

```

```

am_growth_sternum <- data_am_nestlings_all %>%
  subset(!is.na(sternum)) %>%
  subset(age_days <= 34) %>%
  subset(age_days >= 12) %>%
  group_by(ring) %>%
  mutate(
    sternum_n_measures = n()
  ) %>%
  ungroup()

am_growth_sternum <- am_growth_sternum %>%
  subset(!is.na(sternum_n_measures) & sternum_n_measures >= 2) %>%
  dplyr::select(ring, sternum, age_days, sternum_n_measures) %>%
  distinct() %>%
  group_by(ring) %>%
  mutate(
    sternum_growth = coefficients(lm(sternum ~ age_days))[2],
    sternum_r2 = summary(lm(sternum ~ age_days))$r.squared
  ) %>%
  ungroup() %>%
  dplyr::select(
    ring, sternum_growth, sternum_n_measures, sternum_r2
  ) %>%
  distinct()

```

```

## Warning: There were 3 warnings in `mutate()`.
## The first warning was:
## i In argument: `sternum_r2 = summary(lm(sternum ~ age_days))$r.squared`.
## i In group 620: `ring = ring_000987`.
## Caused by warning in `summary.lm()`:
## ! essentially perfect fit: summary may be unreliable
## i Run `dplyr::last_dplyr_warnings()` to see the 2 remaining warnings.

```

```

# adding the growth rates to the dataset
am_nestlings_clim <- merge(am_nestlings_clim,
  merge(am_growth_wing, am_growth_sternum, all = TRUE),
  all.x = TRUE
)

rm(am_growth_wing, am_growth_sternum)

# creating the subsets for the analyses without NAs
data_am_nestlings_wing_growth <- subset(
  am_nestlings_clim, !is.na(wing_growth)
)
data_am_nestlings_sternum_growth <- subset(
  am_nestlings_clim, !is.na(sternum_growth)
)

```

The warnings in this case just indicate that in some cases we have perfect fit, as it's quite likely with fitting a linear model using 2-3 points.

## Checking the resulting growth rates

### Wing growth rate

The histograms of the R squared values are plotted here.

```
hist(data_am_nestlings_wing_growth$wing_r2, breaks = 50)
```

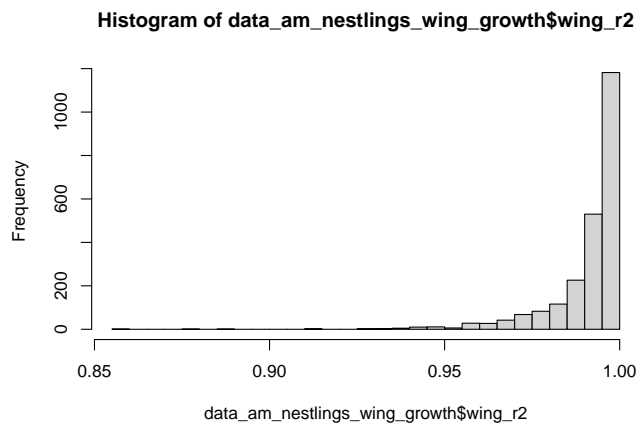

The r2 value for the wing growth rates are  $0.99 + 0.01$  (mean + SD). The histogram and the average values show that the linear fit is a good approximation of the growth of the nestlings within the time window considered.

### Sternum growth rate

The histograms of the R squared values are plotted here.

```
hist(data_am_nestlings_sternum_growth$sternum_r2, breaks = 50)
```

Histogram of data\_am\_nestlings\_sternum\_growth\$sternum\_r2

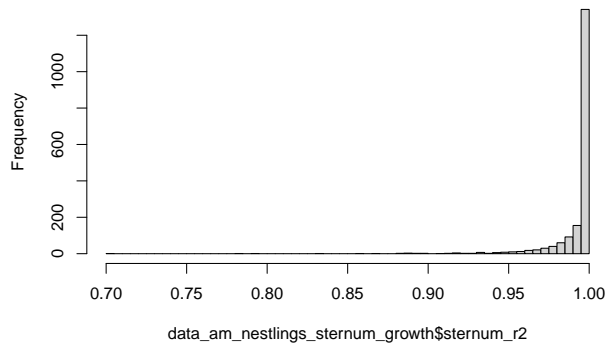

As for the sternum we constructed the slopes for nestlings with at least 2 measurements within the window, here we show also the R squared for nestlings with at least 3 measurements within the window to check that the R squared obtained are still good.

```
hist(subset(
  data_am_nestlings_sternum_growth,
  sternum_n_measures > 2
)$sternum_r2, breaks = 50)
```

of subset(data\_am\_nestlings\_sternum\_growth, sternum\_n\_measures >

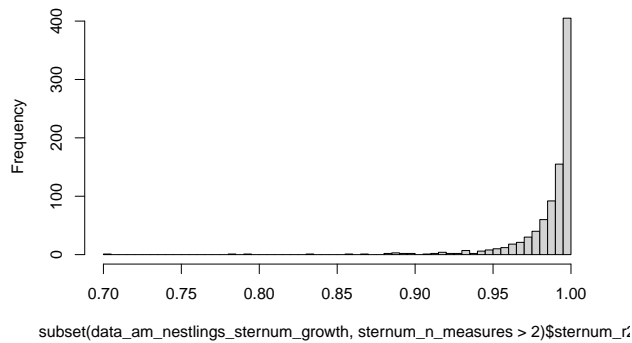

This shows that using a linear slope for the sternum is a good approximation even fore nestlings with only 2 measurements.

The r2 value for the sternum growth rates are  $0.99 + 0.02$  (mean + SD). The histograms and the average values show that the linear fit is a good approximation of the growth of the nestlings within the time window considered.

## Growth rate models

### Wing length

```
wing_growth_climmod_quad <- lmer(
  wing_growth ~
  signal_for_wing_50 +
  I(signal_for_wing_50^2) +
  brood_size + colony +
  hatch_doy_sc +
  (1 | year_f) + (1 | nestcode_rearing),
```

```

control = lmerControl(optimizer = "bobyqa", optCtrl = list(maxfun = 1e+06)),
data = data_am_nestlings_wing_growth
)
wing_growth_climmod_lin <- lmer(
  wing_growth ~
    signal_for_wing_50 +
    brood_size + colony +
    hatch_doy_sc +
    (1 | year_f) + (1 | nestcode_rearing),
  control = lmerControl(optimizer = "bobyqa", optCtrl = list(maxfun = 1e+06)),
  data = data_am_nestlings_wing_growth
)
MuMin::AICc(wing_growth_climmod_quad, wing_growth_climmod_lin)

```

```

##                df      AICc
## wing_growth_climmod_quad  9 1534.603
## wing_growth_climmod_lin   8 1533.470

```

The AIC value is very similar but linear is lower and more parsimonious.

## Sternum length

```

sternum_growth_climmod_quad <- lmer(
  sternum_growth ~
    signal_for_sternum_50 + I(signal_for_sternum_50^2) +
    brood_size + colony +
    hatch_doy_sc +
    (1 | year_f) + (1 | nestcode_rearing),
  control = lmerControl(optimizer = "bobyqa", optCtrl = list(maxfun = 1e+06)),
  data = data_am_nestlings_sternum_growth
)
sternum_growth_climmod_lin <- lmer(
  sternum_growth ~
    signal_for_sternum_50 +
    brood_size + colony +
    hatch_doy_sc +
    (1 | year_f) + (1 | nestcode_rearing),
  control = lmerControl(optimizer = "bobyqa", optCtrl = list(maxfun = 1e+06)),
  data = data_am_nestlings_sternum_growth
)
MuMin::AICc(sternum_growth_climmod_quad, sternum_growth_climmod_lin)

```

```

##                df      AICc
## sternum_growth_climmod_quad  9 -2191.962
## sternum_growth_climmod_lin   8 -2197.919

```

```
# quadratic seems better
```

The linear model has a lower AIC value.

```

wing_growth_climmod <- lmer(
  wing_growth ~
    brood_size + colony +
    hatch_doy_sc +
    signal_for_wing_50 +
    (1 | year_f) + (1 | nestcode_rearing),
  control = lmerControl(optimizer = "bobyqa", optCtrl = list(maxfun = 1e+06)),
  data = data_am_nestlings_wing_growth
)
summary(wing_growth_climmod)

```

```

## Linear mixed model fit by REML. t-tests use Satterthwaite's method ['lmerModLmerTest']
## Formula: wing_growth ~ brood_size + colony + hatch_doy_sc + signal_for_wing_50 +
##   (1 | year_f) + (1 | nestcode_rearing)
## Data: data_am_nestlings_wing_growth
## Control: lmerControl(optimizer = "bobyqa", optCtrl = list(maxfun = 1e+06))
##
## REML criterion at convergence: 1517.4
##
## Scaled residuals:
##   Min       1Q   Median       3Q      Max
## -7.5306 -0.3636  0.0996  0.4841  4.0765
##
## Random effects:
##   Groups                Name                Variance Std.Dev.
## nestcode_rearing (Intercept) 0.05580  0.2362
## year_f            (Intercept) 0.09736  0.3120
## Residual                                0.06619  0.2573
## Number of obs: 2344, groups: nestcode_rearing, 1141; year_f, 25
##
## Fixed effects:
##              Estimate Std. Error      df t value Pr(>|t|)
## (Intercept)      4.97208   0.07832  46.68061  63.484 < 2e-16 ***
## brood_size       -0.13328   0.01391 1276.31114  -9.584 < 2e-16 ***
## colonySlothurn    0.07707   0.02183 1074.50792   3.530 0.000434 ***
## hatch_doy_sc     -0.14156   0.01417 1104.04962  -9.992 < 2e-16 ***
## signal_for_wing_50 0.12872   0.08637  382.29280   1.490 0.136971
## ---
## Signif. codes:  0 '***' 0.001 '**' 0.01 '*' 0.05 '.' 0.1 ' ' 1
##
## Correlation of Fixed Effects:
##              (Intr) brd_sz clnySl htch__
## brood_size  -0.437
## colnySlthrn -0.154 -0.077
## hatch_dy_sc -0.126  0.131  0.083
## sgnl_fr__50 -0.328 -0.017 -0.062  0.110

```

```

sternum_growth_climmod <- lmer(
  sternum_growth ~
    brood_size + colony +
    hatch_doy_sc +
    signal_for_sternum_50 +
    (1 | year_f) + (1 | nestcode_rearing),

```



```

control = lmerControl(optimizer = "bobyqa", optCtrl = list(maxfun = 1e+06)),
data = data_am_nestlings_sternum_growth
)
summary(sternum_growth_climmod)

## Linear mixed model fit by REML. t-tests use Satterthwaite's method ['lmerModLmerTest']
## Formula: sternum_growth ~ brood_size + colony + hatch_doy_sc + signal_for_sternum_50 +
## (1 | year_f) + (1 | nestcode_rearing)
## Data: data_am_nestlings_sternum_growth
## Control: lmerControl(optimizer = "bobyqa", optCtrl = list(maxfun = 1e+06))
##
## REML criterion at convergence: -2214
##
## Scaled residuals:
##   Min       1Q   Median       3Q      Max
## -5.2793 -0.4484  0.0261  0.4572 10.2427
##
## Random effects:
##   Groups             Name                Variance Std.Dev.
## nestcode_rearing (Intercept) 0.007301 0.08545
## year_f             (Intercept) 0.011989 0.10949
## Residual                                0.010893 0.10437
## Number of obs: 1824, groups: nestcode_rearing, 893; year_f, 21
##
## Fixed effects:
##              Estimate Std. Error      df t value Pr(>|t|)
## (Intercept)    9.130e-01  3.132e-02 4.855e+01  29.149 < 2e-16 ***
## brood_size     -2.782e-02  5.829e-03 1.038e+03  -4.773 2.08e-06 ***
## colonySolothurn -1.585e-03  9.607e-03 8.725e+02  -0.165 0.86897
## hatch_doy_sc   -1.810e-02  6.120e-03 8.544e+02  -2.958 0.00318 **
## signal_for_sternum_50 8.008e-02  2.714e-02 3.429e+02   2.951 0.00339 **
## ---
## Signif. codes:  0 '***' 0.001 '**' 0.01 '*' 0.05 '.' 0.1 ' ' 1
##
## Correlation of Fixed Effects:
##              (Intr) brd_sz clnySl htch__
## brood_size  -0.488
## colnySlthrn -0.224 -0.061
## hatch_dy_sc -0.010  0.092  0.078
## sgnl_fr__50 -0.356  0.070  0.046 -0.206

labels <- c(
  `(Intercept)` = "Intercept",
  hatch_doy_sc = "Hatching day",
  brood_size = "Hatching brood size",
  colonySolothurn = "Colony [Solothurn]",
  signal_for_wing_50 = "PC1 (age: 1-48)",
  `I(signal_for_wing_50^2)` = "PC1 (age: 1-48) 2",
  signal_for_sternum_50 = "PC1 (age: 12-34)",
  `I(signal_for_sternum_50^2)` = "PC1 (age: 12-34) 2"
)

sjPlot::tab_model(

```

```

wing_growth_climmod,
sternum_growth_climmod,
file = "output/Tab_wicm_models_growth.doc",
string.est = "Estimate",
string.se = "SE",
show.ci = FALSE,
show.se = TRUE,
show.stat = FALSE,
show.df = FALSE,
pred.labels = labels
)

```

## Figure

```

cowplot::plot_grid(
  fun_climres(wing_growth_climmod, data_am_nestlings_wing_growth),
  fun_climres(sternum_growth_climmod, data_am_nestlings_sternum_growth),
  nrow = 2, align = c("v", "h")
)

```

```

# Save the plot to the figures directory
ggsave("figures/Fig. 4 - growths-weather.png", width = 4, height = 5, dpi = 300)

```

## Supporting Information 03: Correlation between the size and growth

### Figure

Here we show the correlation between the size at 50 days (wing, sternum and mass) and the growth rates (wing and sternum).

```

PerformanceAnalytics::chart.Correlation(am_nestlings_clim[
  ,
  c("wing_50", "wing_growth", "sternum_50", "sternum_growth", "mass_50")
], histogram = TRUE, pch = 19, method = "pearson")

```

```

## Warning in par(usr): argument 1 does not name a graphical parameter
## Warning in par(usr): argument 1 does not name a graphical parameter
## Warning in par(usr): argument 1 does not name a graphical parameter
## Warning in par(usr): argument 1 does not name a graphical parameter
## Warning in par(usr): argument 1 does not name a graphical parameter
## Warning in par(usr): argument 1 does not name a graphical parameter
## Warning in par(usr): argument 1 does not name a graphical parameter
## Warning in par(usr): argument 1 does not name a graphical parameter
## Warning in par(usr): argument 1 does not name a graphical parameter
## Warning in par(usr): argument 1 does not name a graphical parameter

```

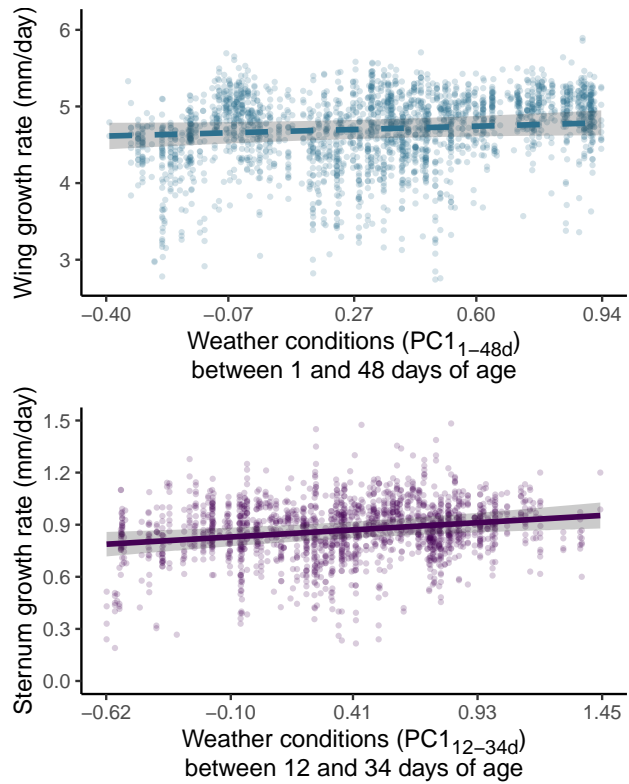

Figure 5: Fig. 4 - Variation in wing and sternum growth rates of nestling Alpine swifts in relation to weather conditions encountered during development. Weather conditions resulted from a principal component analysis (PC1) between daily average temperature and daily rain, and traits were affected by weather conditions over different time windows. PC1 has low values with cold and rainy days and high values with sunny and warm days. Solid lines (and 95% confidence intervals) are predictions from the models presented in Table 3. Climatic windows are reported using the nestling's age as a reference.

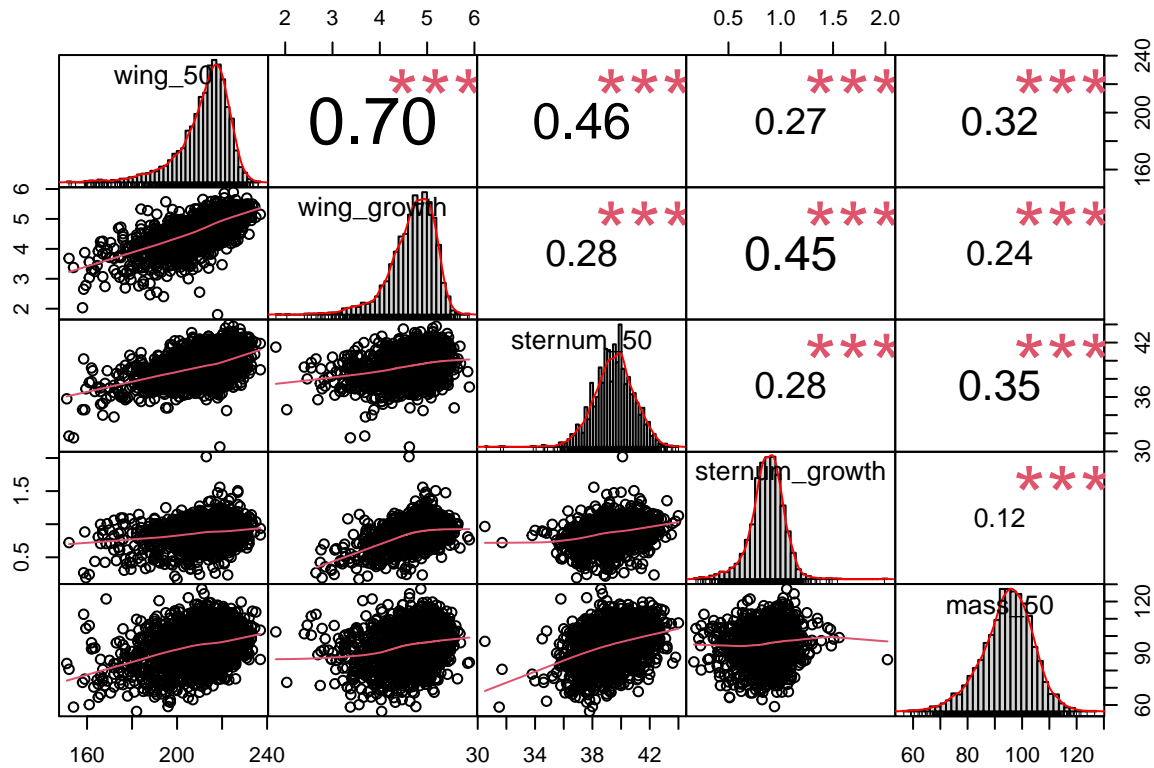

In the above plot:

- The distribution of each variable is shown on the diagonal.
- On the bottom of the diagonal: the bivariate scatter plots with a fitted line are displayed
- On the top of the diagonal: the value of the correlation (Pearson r) plus the significance level as stars
- Each significance level (p-values: 0, 0.001, 0.01, 0.05, 0.1, 1) is associated to a symbol.

## Pearson's correlation tests

### Wing length

```
cor.test(am_nestlings_clim$wing_50, am_nestlings_clim$wing_growth)
```

```
##
## Pearson's product-moment correlation
##
## data: am_nestlings_clim$wing_50 and am_nestlings_clim$wing_growth
## t = 47.217, df = 2342, p-value < 2.2e-16
## alternative hypothesis: true correlation is not equal to 0
## 95 percent confidence interval:
## 0.6770023 0.7185188
## sample estimates:
## cor
## 0.6983475
```

### Sternum length

```

cor.test(am_nestlings_clim$sternum_50, am_nestlings_clim$sternum_growth)

##
## Pearson's product-moment correlation
##
## data:  am_nestlings_clim$sternum_50 and am_nestlings_clim$sternum_growth
## t = 12.544, df = 1822, p-value < 2.2e-16
## alternative hypothesis: true correlation is not equal to 0
## 95 percent confidence interval:
##  0.2391484 0.3236600
## sample estimates:
##      cor
## 0.281951

```

## Supporting Information 04: Short-term consequences

### Probability of fledging

To investigate the number of nestlings that survived I use `cbind()` with the number of nestlings that fledged and the number of nestlings that did not fledge (number of hatchlings - number of fledglings) using the data from nests with at least 1 nestling fledging.

```

data_am_nests$hatch_date <- as.Date(data_am_nests$hatch_date)
data_am_nests$date_50days <- data_am_nests$hatch_date + 50
data_am_nests$hatch_doy_sc <- fun_scale(yday(data_am_nests$hatch_date))
data_am_nests$year_f <- data_am_nests$year

data_am_nests <- droplevels(data_am_nests)
data_am_nests$prop <- data_am_nests$fledged /
  (data_am_nests$fledged + data_am_nests$not_fledg)

data_signals <- am_nestlings_clim[c(
  "date_50days", "signal_for_wing_50",
  "signal_for_sternum_50", "signal_for_mass_50"
)] %>%
  distinct(date_50days, .keep_all = TRUE)

data_am_nests <- merge(
  data_am_nests,
  data_signals,
  all.x = TRUE, all.y = FALSE
)
data_am_nests$obs <- seq_len(nrow(data_am_nests))

```

I'm interested in comparing the weather variables that affect each of the trait, to see which is the window that best affects the probability of fledging. To be able to compare the 3 models I first create a subset that has complete cases for all 3 weather conditions.

```

am_nest_clim_reduced <- subset(subset(
  subset(data_am_nests, !is.na(signal_for_mass_50)),
  !is.na(signal_for_wing_50)
), !is.na(signal_for_sternum_50))

am_nest_clim_wing <- subset(data_am_nests, !is.na(signal_for_wing_50))

fledg_surv_climmod_wing <- glmer(
  cbind(fledged, not_fledg) ~
  brood_size +
  colony +
  hatch_doy_sc +
  signal_for_wing_50 +
  (1 | year_f) +
  (1 | obs),
  data = am_nest_clim_reduced,
  family = binomial,
  control = glmerControl(optimizer = "bobyqa", optCtrl = list(maxfun = 1e+06))
)

fledg_surv_climmod_sternum <- glmer(
  cbind(fledged, not_fledg) ~
  brood_size +
  colony +
  hatch_doy_sc +
  signal_for_sternum_50 +
  (1 | year_f) +
  (1 | obs),
  data = am_nest_clim_reduced,
  family = binomial,
  control = glmerControl(optimizer = "bobyqa", optCtrl = list(maxfun = 1e+06))
)

fledg_surv_climmod_mass <- glmer(
  cbind(fledged, not_fledg) ~
  brood_size +
  colony +
  hatch_doy_sc +
  signal_for_mass_50 +
  (1 | year_f) +
  (1 | obs),
  data = am_nest_clim_reduced,
  family = binomial,
  control = glmerControl(optimizer = "bobyqa", optCtrl = list(maxfun = 1e+06))
)

MuMin::AICc(
  fledg_surv_climmod_wing,
  fledg_surv_climmod_sternum,
  fledg_surv_climmod_mass
)

```

```
##                df      AICc
```

```
## fledg_surv_climmod_wing      7 2696.659
## fledg_surv_climmod_sternum  7 2699.054
## fledg_surv_climmod_mass     7 2698.325
```

The climatic window for the sternum length is better even if the models have very similar AIC ( $\Delta AIC_c < 4$ ). To keep a larger sample size and to be consistent with the following analysis we decided to use the one for the wing length. The window for sternum length is anyway fully included in the window for wing length.

### Testing for quadratic effects

```
fledg_surv_climmod_quad <- glmer(
  cbind(fledged, not_fledged) ~
    brood_size +
    colony +
    hatch_doy_sc +
    signal_for_wing_50 +
    I(signal_for_wing_50^2) +
    (1 | year_f) +
    (1 | obs),
  data = am_nest_clim_wing,
  family = binomial,
  control = glmerControl(optimizer = "bobyqa", optCtrl = list(maxfun = 1e+06))
)
fledg_surv_climmod_lin <- glmer(
  cbind(fledged, not_fledged) ~
    brood_size +
    colony +
    hatch_doy_sc +
    signal_for_wing_50 +
    (1 | year_f) +
    (1 | obs),
  data = am_nest_clim_wing,
  family = binomial,
  control = glmerControl(optimizer = "bobyqa", optCtrl = list(maxfun = 1e+06))
)
MuMIn::AICc(fledg_surv_climmod_lin, fledg_surv_climmod_quad)
```

```
##                df    AICc
## fledg_surv_climmod_lin  7 3020.567
## fledg_surv_climmod_quad  8 3022.307
```

Not keeping the quadratic effect

**Checking for overdispersion** The models above showed overdispersion when I did not included an observation-level random effect. See an example of the results on overdispersion here:

```
fledg_surv_climmod_lin_overdispersed <- glmer(
  cbind(fledged, not_fledged) ~
    brood_size +
    colony +
    hatch_doy_sc +
    signal_for_wing_50 +
    (1 | year_f),
```

```

data = am_nest_clim_wing,
family = binomial,
control = glmerControl(optimizer = "bobyqa", optCtrl = list(maxfun = 1e+06))
)
performance::check_overdispersion(fledg_surv_climmod_lin_overdispersed)

```

```

## # Overdispersion test
##
## dispersion ratio = 1.178
##           p-value = 0.008

```

```
## Overdispersion detected.
```

Therefore in all the models on fledgling survival presented above I have included an observation level random effect that deals with the overdispersion of the data. See new results here:

```
performance::check_overdispersion(fledg_surv_climmod_lin)
```

```

## # Overdispersion test
##
## dispersion ratio = 1.055
##           p-value = 0.336

```

```
## No overdispersion detected.
```

Now there seem to be no overdispersion detected.

## Age at fledging

For some years we have data on the age at fledging, so we can check the correlation between age at fledging, size and growth of nestlings

Correlation plot, plus I've tried some analyses, but they are VERY preliminary and need to be checked.

```

am_age_fledging <- am_nestlings_clim %>%
  subset(!duplicated(ring)) %>%
  subset(!is.na(age_fledging)) %>%
  # subset(!is.na(sternum_50)) %>%
  # subset(year < 2012) %>%
  dplyr::select(
    year, ring, age_fledging,
    brood_size, colony, hatch_doy_sc,
    date_50days,
    wing_50, wing_growth,
    sternum_50, sternum_growth,
    mass_50,
    year_f, nestcode_rearing,
    signal_for_mass_50, signal_for_wing_50,
    signal_for_sternum_50
  )

```



```

am_age_fledging <- am_age_fledging %>%
  filter(year != 2012) %>%
  droplevels()

am_age_fledging_reduced <- am_age_fledging %>%
  filter(!is.na(signal_for_mass_50)) %>%
  filter(!is.na(signal_for_wing_50)) %>%
  filter(!is.na(signal_for_sternum_50))

am_age_fledging_wing <- am_age_fledging %>%
  filter(!is.na(signal_for_wing_50))

age_fledg_climmod_wing <- lmer(
  age_fledging ~
    signal_for_wing_50 +
    brood_size +
    colony +
    hatch_doy_sc +
    (1 | year_f) + (1 | nestcode_rearing),
  data = am_age_fledging_reduced,
  control = lmerControl(
    optimizer = "bobyqa",
    optCtrl = list(maxfun = 1e+07)
  )
)

age_fledg_climmod_sternum <- lmer(
  age_fledging ~
    signal_for_sternum_50 +
    brood_size +
    colony +
    hatch_doy_sc +
    (1 | year_f) + (1 | nestcode_rearing),
  data = am_age_fledging_reduced,
  control = lmerControl(
    optimizer = "bobyqa",
    optCtrl = list(maxfun = 1e+07)
  )
)

age_fledg_climmod_mass <- lmer(
  age_fledging ~
    signal_for_mass_50 +
    brood_size +
    colony +
    hatch_doy_sc +
    (1 | year_f) + (1 | nestcode_rearing),
  data = am_age_fledging_reduced,
  control = lmerControl(
    optimizer = "bobyqa",
    optCtrl = list(maxfun = 1e+07)
  )
)

```

```
)
MuMIn::AICc(age_fledg_climmod_wing, age_fledg_climmod_sternum, age_fledg_climmod_mass)

##                df      AICc
## age_fledg_climmod_wing    8 2936.399
## age_fledg_climmod_sternum  8 2948.733
## age_fledg_climmod_mass    8 2940.965
```

The climatic window for the wings is the best one.

### Testing for quadratic effects

```
age_fledg_climmod_quad <- lmer(
  age_fledging ~
    signal_for_wing_50 +
    I(signal_for_wing_50^2) +
    brood_size +
    colony +
    hatch_doy_sc +
    (1 | year_f) + (1 | nestcode_rearing),
  data = am_age_fledging_wing,
  control = lmerControl(
    optimizer = "bobyqa",
    optCtrl = list(maxfun = 1e+07)
  )
)

age_fledg_climmod_lin <- lmer(
  age_fledging ~
    signal_for_wing_50 +
    brood_size +
    colony +
    hatch_doy_sc +
    (1 | year_f) + (1 | nestcode_rearing),
  data = am_age_fledging_wing,
  control = lmerControl(
    optimizer = "bobyqa",
    optCtrl = list(maxfun = 1e+07)
  )
)
MuMIn::AICc(age_fledg_climmod_quad, age_fledg_climmod_lin)

##                df      AICc
## age_fledg_climmod_quad    9 3918.432
## age_fledg_climmod_lin    8 3920.814
```

Models practically the same, not keeping the quadratic effect

```
labels <- c(
  `(Intercept)` = "Intercept",
  hatch_doy_sc = "Hatching day",
```

```

brood_size = "Hatching brood size",
signal_for_wing_50 = "PC1 (age: 1-48)",
`I(signal_for_wing_50^2)` = "PC1 (age: 1-48) 2",
colonySolothurn = "Colony [Solothurn]"
)

sjPlot::tab_model(
  fledg_surv_climmod_lin,
  age_fledg_climmod_lin,
  file = "output/Tab_short_conseq.doc",
  string.est = "Estimate",
  string.se = "SE",
  string.pred = "Predictors",
  show.ci = FALSE,
  show.se = TRUE,
  show.stat = FALSE,
  show.df = FALSE,
  pred.labels = labels
)

```

## Figure

```

eff_data <- data.frame(effects::effect("signal_for_wing_50",
  fledg_surv_climmod_lin,
  partial.residuals = TRUE
))
plot_fledg <- ggplot(eff_data, aes(signal_for_wing_50, fit)) +
  geom_ribbon(aes(ymin = lower, ymax = upper), alpha = .25) +
  geom_line(linewidth = 1) +
  theme(
    legend.position = "none",
    panel.grid.major = element_blank(),
    panel.grid.minor = element_blank(),
    panel.background = element_blank(),
    axis.line = element_line(colour = "black")
  ) +
  xlab("") +
  geom_jitter(
    data = am_nest_clim_wing,
    aes(
      x = signal_for_wing_50,
      y = prop
    ),
    height = 0.03,
    size = 1,
    shape = 19,
    alpha = 0.2
  ) +
  ylab("Nestling survival up to fledging") +
  scale_x_continuous(limits = c(-0.4, 1), breaks = seq(-0.4, 1, 0.2)) +
  scale_y_continuous(limits = c(0, 1.03), breaks = seq(0, 1, 0.2)) +
  annotate("text", x = -0.4, y = 1, label = "(a)")

```

```

eff_data <- data.frame(effects::effect("signal_for_wing_50",
  age_fledg_climmod_quad,
  partial.residuals = TRUE
))
plot_age_fl <- ggplot(eff_data, aes(signal_for_wing_50, fit)) +
  geom_ribbon(aes(ymin = lower, ymax = upper), alpha = .25) +
  geom_line(linewidth = 1) +
  theme(
    legend.position = "none",
    panel.grid.major = element_blank(),
    panel.grid.minor = element_blank(),
    panel.background = element_blank(),
    axis.line = element_line(colour = "black"),
    axis.title.x = element_markdown()
  ) +
  xlab("Weather conditions (PC1<sub>1-48d</sub><br>between 1 and 48 days of age") +
  geom_point(
    data = am_age_fledging_wing,
    aes(
      x = signal_for_wing_50,
      y = age_fledging
    ),
    size = 1,
    shape = 19,
    alpha = 0.2
  ) +
  ylab("Age at fledging (days)") +
  scale_y_continuous(limits = c(50, 76), breaks = seq(45, 90, 5)) +
  scale_x_continuous(limits = c(-0.4, 1), breaks = seq(-0.4, 1, 0.2)) +
  annotate("text", x = -0.4, y = 75, label = "(b)")

cowplot::plot_grid(plot_fledg, plot_age_fl,
  nrow = 2, align = "v"
)

```

```

# Save the plot to the figures directory
ggsave("figures/Fig. 5.png", width = 4, height = 5, dpi = 300)

```

## Session information

On top of using renv, the R session information is printed here for reproducibility.

```
sessionInfo()
```

```

## R version 4.3.3 (2024-02-29)
## Platform: aarch64-apple-darwin20 (64-bit)
## Running under: macOS Sonoma 14.4.1
##
## Matrix products: default
## BLAS: /System/Library/Frameworks/Accelerate.framework/Versions/A/Frameworks/vecLib.framework/Versi

```

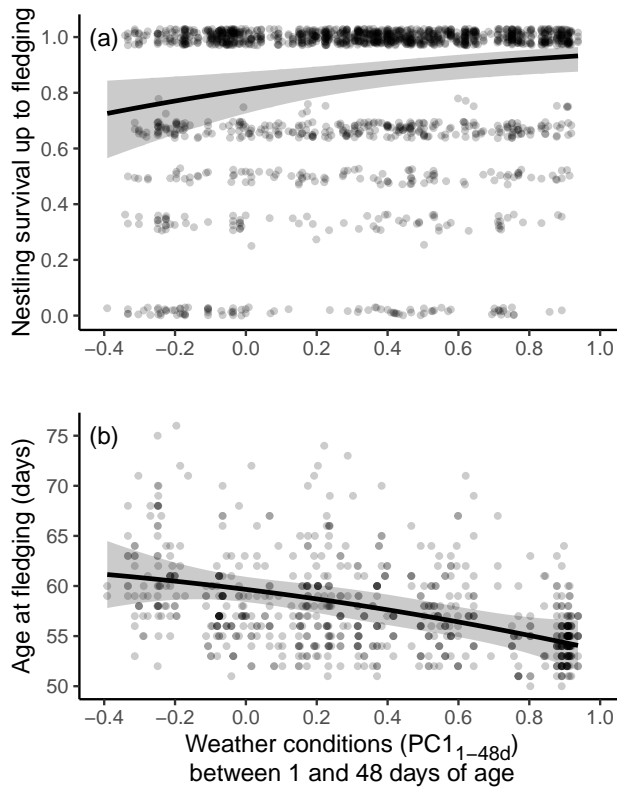

Figure 6: Fig. 5 - Variation in (a) the nestling survival (calculated as the weighted proportion of hatchlings from a nest that successfully fledge) and (b) age at fledging (in days) in relation to weather conditions encountered during development in nestling Alpine swifts. Weather conditions are the resultant of a principal component analysis between daily average temperature and daily rain in the window that best explains the variation in wing length at 50 days. Predicted lines are obtained using average values of the other continuous variables. Climatic windows are reported using the nestling's age as a reference.

```

## LAPACK: /Library/Frameworks/R.framework/Versions/4.3-arm64/Resources/lib/libRlapack.dylib; LAPACK v
##
## locale:
## [1] en_US.UTF-8/en_US.UTF-8/en_US.UTF-8/C/en_US.UTF-8/en_US.UTF-8
##
## time zone: Europe/Zurich
## tzcode source: internal
##
## attached base packages:
## [1] stats      graphics  grDevices datasets  utils      methods    base
##
## other attached packages:
## [1] viridis_0.6.5      viridisLite_0.4.2  ggeffects_1.5.2    visreg_2.7.0
## [5] emmeans_1.10.1    tidyr_1.3.1        performance_0.11.0 sjPlot_2.8.15
## [9] scales_1.3.0      ggtext_0.1.2       MuMIn_1.47.5       segmented_2.0-3
## [13] nlme_3.1-164      MASS_7.3-60.0.1    climwin_1.2.3      gridExtra_2.3
## [17] ggplot2_3.5.0     lmerTest_3.1-3     lme4_1.1-35.2      Matrix_1.6-5
## [21] lubridate_1.9.3   dplyr_1.1.4
##
## loaded via a namespace (and not attached):
## [1] DBI_1.2.2          rlang_1.1.3        magrittr_2.0.3
## [4] compiler_4.3.3    mgcv_1.9-1         vctr_0.6.5
## [7] quadprog_1.5-8    stringr_1.5.1      pkgconfig_2.0.3
## [10] crayon_1.5.2      fastmap_1.1.1     backports_1.4.1
## [13] labeling_0.4.3    utf8_1.2.4         rmarkdown_2.26
## [16] markdown_1.12     nloptr_2.0.3      tinytex_0.50
## [19] purrr_1.0.2       xfun_0.43          jsonlite_1.8.8
## [22] highr_0.10        reshape_0.8.9     sjmisc_2.8.9
## [25] broom_1.0.5       R6_2.5.1          stringi_1.8.3
## [28] car_3.1-2         boot_1.3-30       numDeriv_2016.8-1.1
## [31] estimability_1.5  Rcpp_1.0.12       RcppRoll_0.3.0
## [34] knitr_1.46        modelr_0.1.11     DHARMA_0.4.6
## [37] zoo_1.8-12        splines_4.3.3     nnet_7.3-19
## [40] timechange_0.3.0 tidyselect_1.2.1  effects_4.2-2
## [43] abind_1.4-5       yaml_2.3.8        codetools_0.2-20
## [46] sjlabelled_1.2.0 lattice_0.22-6    tibble_3.2.1
## [49] plyr_1.8.9        withr_3.0.0       bayestestR_0.13.2
## [52] evaluate_0.23     PerformanceAnalytics_2.0.4 survival_3.5-8
## [55] survey_4.4-2      xts_0.13.2        xml2_1.3.6
## [58] pillar_1.9.0     carData_3.0-5     renv_1.0.7
## [61] stats4_4.3.3     insight_0.19.10   generics_0.1.3
## [64] munsell_0.5.1    commonmark_1.9.1  minqa_1.2.6
## [67] xtable_1.8-4     glue_1.7.0        tools_4.3.3
## [70] mvtnorm_1.2-4    cowplot_1.1.3     grid_4.3.3
## [73] mitools_2.4      colorspace_2.1-0  cli_3.6.2
## [76] evd_2.3-6.1     fansi_1.0.6       sjstats_0.18.2
## [79] gtable_0.3.4     digest_0.6.35     farver_2.1.1
## [82] htmltools_0.5.8.1 lifecycle_1.0.4   gridtext_0.1.5

```

References for the uploaded packages

```

packages <- c()
for (i in 1:14) {
  packages[i] <- sessionInfo()$otherPkgs[[i]]$Package
}

```

```
print(citation(packages[i]))
}
```

```
## To cite viridis/viridisLite in publications use:
```

```
##
```

```
## Simon Garnier, Noam Ross, Robert Rudis, Antônio P. Camargo, Marco Sciaini, and  
## Cédric Scherer (2024). viridis(Lite) - Colorblind-Friendly Color Maps for R. viridis  
## package version 0.6.5.
```

```
##
```

```
## A BibTeX entry for LaTeX users is
```

```
##
```

```
## @Manual{,
```

```
## title = {{viridis(Lite)} - Colorblind-Friendly Color Maps for R},
```

```
## author = {{Garnier} and {Simon} and {Ross} and {Noam} and {Rudis} and {Robert} and {Camargo} and
```

```
## year = {2024},
```

```
## note = {viridis package version 0.6.5},
```

```
## url = {https://sjmgarnier.github.io/viridis/},
```

```
## doi = {10.5281/zenodo.4679423},
```

```
## }
```

```
## To cite viridis/viridisLite in publications use:
```

```
##
```

```
## Simon Garnier, Noam Ross, Robert Rudis, Antônio P. Camargo, Marco Sciaini, and  
## Cédric Scherer (2023). viridis(Lite) - Colorblind-Friendly Color Maps for R.
```

```
## viridisLite package version 0.4.2.
```

```
##
```

```
## A BibTeX entry for LaTeX users is
```

```
##
```

```
## @Manual{,
```

```
## title = {{viridis(Lite)} - Colorblind-Friendly Color Maps for R},
```

```
## author = {{Garnier} and {Simon} and {Ross} and {Noam} and {Rudis} and {Robert} and {Camargo} and
```

```
## year = {2023},
```

```
## note = {viridisLite package version 0.4.2},
```

```
## url = {https://sjmgarnier.github.io/viridis/},
```

```
## doi = {10.5281/zenodo.4678327},
```

```
## }
```

```
## To cite package 'ggeffects' in publications use:
```

```
##
```

```
## Lüdecke D (2018). "ggeffects: Tidy Data Frames of Marginal Effects from Regression  
## Models." _Journal of Open Source Software_, *3*(26), 772. doi:10.21105/joss.00772
```

```
## <https://doi.org/10.21105/joss.00772>.
```

```
##
```

```
## A BibTeX entry for LaTeX users is
```

```
##
```

```
## @Article{,
```

```
## title = {ggeffects: Tidy Data Frames of Marginal Effects from Regression Models.},
```

```
## volume = {3},
```

```
## doi = {10.21105/joss.00772},
```

```
## number = {26},
```

```
## journal = {Journal of Open Source Software},
```

```
## author = {Daniel Lüdecke},
```

```
## year = {2018},
```

```
## pages = {772},
```

```
## }
```

```

## To cite visreg in publications use:
##
##   Breheny P and Burchett W (2017). Visualization of Regression Models Using visreg.
##   The R Journal, 9: 56-71.
##
## A BibTeX entry for LaTeX users is
##
##   @Article{,
##     author = {Patrick Breheny and Woodrow Burchett},
##     title = {Visualization of Regression Models Using visreg},
##     journal = {The R Journal},
##     year = {2017},
##     volume = {9},
##     pages = {56--71},
##     number = {2},
##   }
## To cite package 'emmeans' in publications use:
##
##   Lenth R (2024). _emmeans: Estimated Marginal Means, aka Least-Squares Means_. R
##   package version 1.10.1, <https://CRAN.R-project.org/package=emmeans>.
##
## A BibTeX entry for LaTeX users is
##
##   @Manual{,
##     title = {emmeans: Estimated Marginal Means, aka Least-Squares Means},
##     author = {Russell V. Lenth},
##     year = {2024},
##     note = {R package version 1.10.1},
##     url = {https://CRAN.R-project.org/package=emmeans},
##   }
## To cite package 'tidyr' in publications use:
##
##   Wickham H, Vaughan D, Girlich M (2024). _tidyr: Tidy Messy Data_. R package version
##   1.3.1, <https://CRAN.R-project.org/package=tidyr>.
##
## A BibTeX entry for LaTeX users is
##
##   @Manual{,
##     title = {tidyr: Tidy Messy Data},
##     author = {Hadley Wickham and Davis Vaughan and Maximilian Girlich},
##     year = {2024},
##     note = {R package version 1.3.1},
##     url = {https://CRAN.R-project.org/package=tidyr},
##   }
## To cite package 'performance' in publications use:
##
##   Lüdtke et al., (2021). performance: An R Package for Assessment, Comparison and
##   Testing of Statistical Models. Journal of Open Source Software, 6(60), 3139.
##   https://doi.org/10.21105/joss.03139
##
## A BibTeX entry for LaTeX users is
##
##   @Article{,
##     title = {{performance}: An {R} Package for Assessment, Comparison and Testing of Statistical Models}

```



```

##   author = {Daniel Lüdecke and Mattan S. Ben-Shachar and Indrajeet Patil and Philip Waggoner and D
##   year = {2021},
##   journal = {Journal of Open Source Software},
##   volume = {6},
##   number = {60},
##   pages = {3139},
##   doi = {10.21105/joss.03139},
## }
## To cite package 'sjPlot' in publications use:
##
##   Lüdecke D (2023). _sjPlot: Data Visualization for Statistics in Social Science_. R
##   package version 2.8.15, <https://CRAN.R-project.org/package=sjPlot>.
##
## A BibTeX entry for LaTeX users is
##
##   @Manual{,
##     title = {sjPlot: Data Visualization for Statistics in Social Science},
##     author = {Daniel Lüdecke},
##     year = {2023},
##     note = {R package version 2.8.15},
##     url = {https://CRAN.R-project.org/package=sjPlot},
##   }
## To cite package 'scales' in publications use:
##
##   Wickham H, Pedersen T, Seidel D (2023). _scales: Scale Functions for Visualization_.
##   R package version 1.3.0, <https://CRAN.R-project.org/package=scales>.
##
## A BibTeX entry for LaTeX users is
##
##   @Manual{,
##     title = {scales: Scale Functions for Visualization},
##     author = {Hadley Wickham and Thomas Lin Pedersen and Dana Seidel},
##     year = {2023},
##     note = {R package version 1.3.0},
##     url = {https://CRAN.R-project.org/package=scales},
##   }
## To cite package 'ggtext' in publications use:
##
##   Wilke C, Wiernik B (2022). _ggtext: Improved Text Rendering Support for 'ggplot2'_.
##   R package version 0.1.2, <https://CRAN.R-project.org/package=ggtext>.
##
## A BibTeX entry for LaTeX users is
##
##   @Manual{,
##     title = {ggtext: Improved Text Rendering Support for 'ggplot2'},
##     author = {Claus O. Wilke and Brenton M. Wiernik},
##     year = {2022},
##     note = {R package version 0.1.2},
##     url = {https://CRAN.R-project.org/package=ggtext},
##   }
## To cite package 'MuMIn' in publications use:
##
##   Bartoń K (2023). _MuMIn: Multi-Model Inference_. R package version 1.47.5,
##   <https://CRAN.R-project.org/package=MumIn>.

```

```

##
## A BibTeX entry for LaTeX users is
##
## @Manual{,
##   title = {MuMIn: Multi-Model Inference},
##   author = {Kamil Bartoń},
##   year = {2023},
##   note = {R package version 1.47.5},
##   url = {https://CRAN.R-project.org/package=MuMIn},
## }
##
## ATTENTION: This citation information has been auto-generated from the package
## DESCRIPTION file and may need manual editing, see 'help("citation")'.
## To cite segmented in publications use one or more of the following papers:
##
## Fasola S, Muggeo VMR, Kuchenhoff K. (2018). A heuristic, iterative algorithm for
## change-point detection in abrupt change models. Computational Statistics, 33,
## 997-1015.
##
## Muggeo VMR (2003). Estimating regression models with unknown break-points.
## Statistics in Medicine, 22, 3055-3071.
##
## Muggeo VMR (2008). segmented: an R Package to Fit Regression Models with Broken-Line
## Relationships. R News, 8/1, 20-25. URL https://cran.r-project.org/doc/Rnews/.
##
## Muggeo VMR (2016). Testing with a nuisance parameter present only under the
## alternative: a score-based approach with application to segmented modelling. J of
## Statistical Computation and Simulation, 86, 3059-3067.
##
## Muggeo VMR (2017). Interval estimation for the breakpoint in segmented regression: a
## smoothed score-based approach. Australian & New Zealand Journal of Statistics, 59,
## 311-322.
##
## Muggeo VMR, Atkinhs DC, Gallopp RJ, Dimidjian S (2014). Segmented mixed models with
## random changepoints: a maximum likelihood approach with application to treatment for
## depression study Statistical Modelling, 14, 293-313.
##
## To see these entries in BibTeX format, use 'print(<citation>, bibtex=TRUE)',
## 'toBibtex(.)', or set 'options(citation.bibtex.max=999)'.
## To cite package 'nlme' in publications use:
##
## Pinheiro J, Bates D, R Core Team (2023). _nlme: Linear and Nonlinear Mixed Effects
## Models_. R package version 3.1-164, <https://CRAN.R-project.org/package=nlme>.
##
## Pinheiro JC, Bates DM (2000). _Mixed-Effects Models in S and S-PLUS_. Springer, New
## York. doi:10.1007/b98882 <https://doi.org/10.1007/b98882>.
##
## To see these entries in BibTeX format, use 'print(<citation>, bibtex=TRUE)',
## 'toBibtex(.)', or set 'options(citation.bibtex.max=999)'.
## To cite the MASS package in publications use:
##
## Venables, W. N. & Ripley, B. D. (2002) Modern Applied Statistics with S. Fourth
## Edition. Springer, New York. ISBN 0-387-95457-0
##

```

```
## A BibTeX entry for LaTeX users is
##
## @Book{,
##   title = {Modern Applied Statistics with S},
##   author = {W. N. Venables and B. D. Ripley},
##   publisher = {Springer},
##   edition = {Fourth},
##   address = {New York},
##   year = {2002},
##   note = {ISBN 0-387-95457-0},
##   url = {https://www.stats.ox.ac.uk/pub/MASS4/},
## }
```
